# Supplementary material
Source: PubMed Central journal article supplement (PMC3025753)
Supplement: NIHMS261578-supplement-1_si_001.pdf [file NIHMS261578-supplement-1_si_001.pdf]

## Supporting Information

# Oxidation of Organotrifluoroborates via Oxone<sup>®</sup>

Gary A. Molander\* and Livia N. Cavalcanti

Roy and Diana Vagelos Laboratories, Department of Chemistry,

University of Pennsylvania, Philadelphia, Pennsylvania, 19104-6323

[gmolandr@sas.upenn.edu](mailto:gmolandr@sas.upenn.edu)

### Contents:

|                                                                     |        |
|---------------------------------------------------------------------|--------|
| General Considerations .....                                        | S1     |
| Analysis of 3-Hydroxy-N-(4-methoxyphenyl)butanamide using SFC ..... | S2     |
| NMR spectras .....                                                  | S3-S92 |

**General Considerations:** All of the reagents and HPLC grade acetone were used as received. Melting points (°C) are uncorrected. <sup>1</sup>H, <sup>13</sup>C, and <sup>19</sup>F NMR spectra were recorded at 500.4, 125.8, and 470.8 MHz, respectively. <sup>19</sup>F NMR chemical shifts were referenced to external CFCl<sub>3</sub> (0.0 ppm). Compounds **4d** and **4e** were characterized by comparison of their NMR data with commercially available samples.

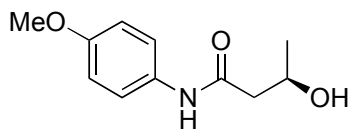

### Analysis of 3-Hydroxy-*N*-(4-methoxyphenyl)butanamide using SFC.

Analysis was performed using Column OD-H, 20% *i*-PrOH, 4 mL, 12MPa.

(*S*) – isomer  $t_r = 2.3$  min and (*R*) – isomer  $t_r = 2.4$  min.

### Chromatogram of racemic 3-Hydroxy-*N*-(4-methoxyphenyl)butanamide product:

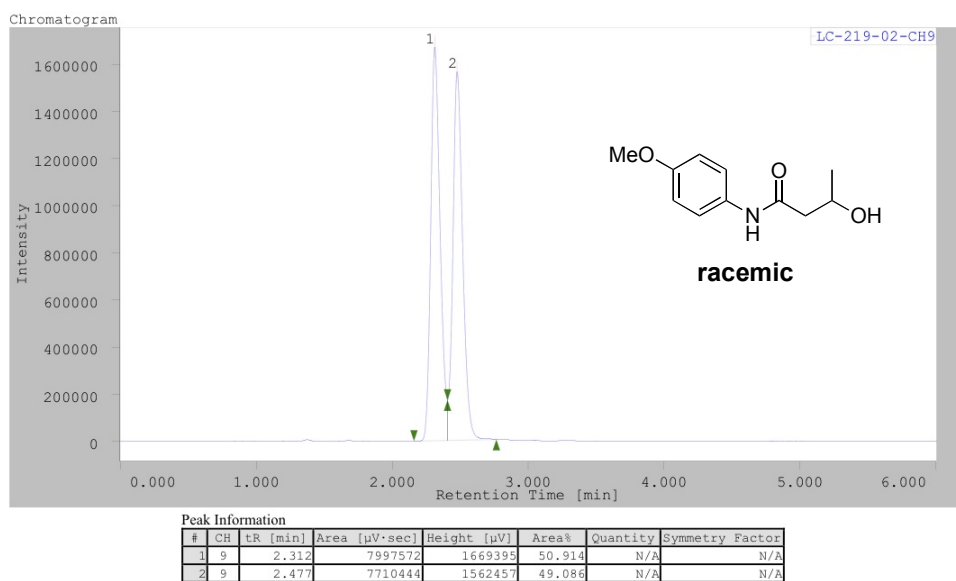

### Chromatogram of enantioenriched 3-Hydroxy-*N*-(4-methoxyphenyl)butanamide product (5):

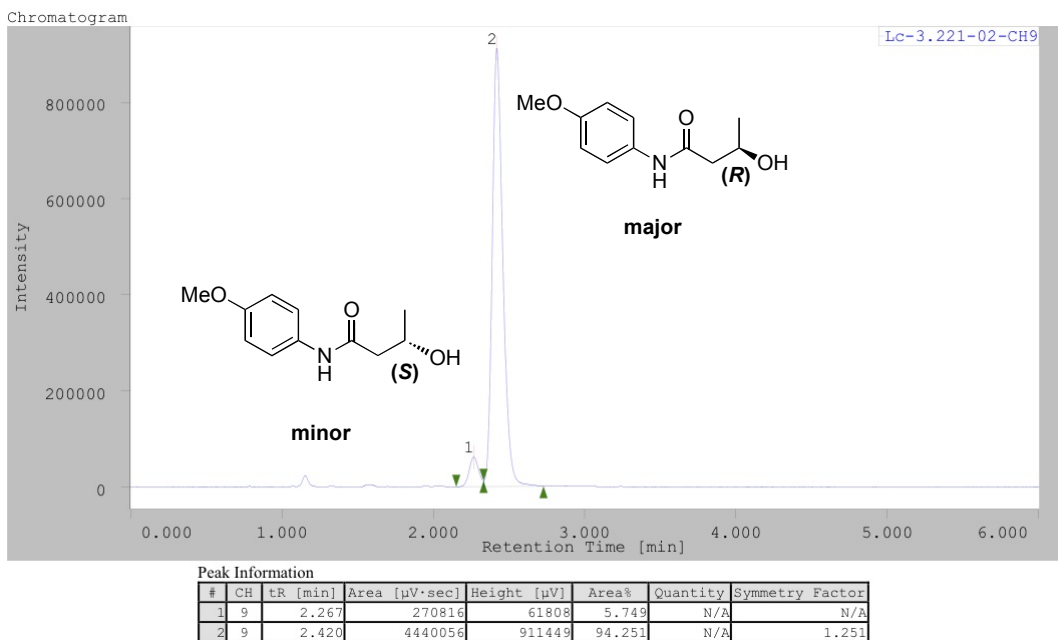

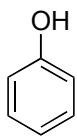

**(1a)**

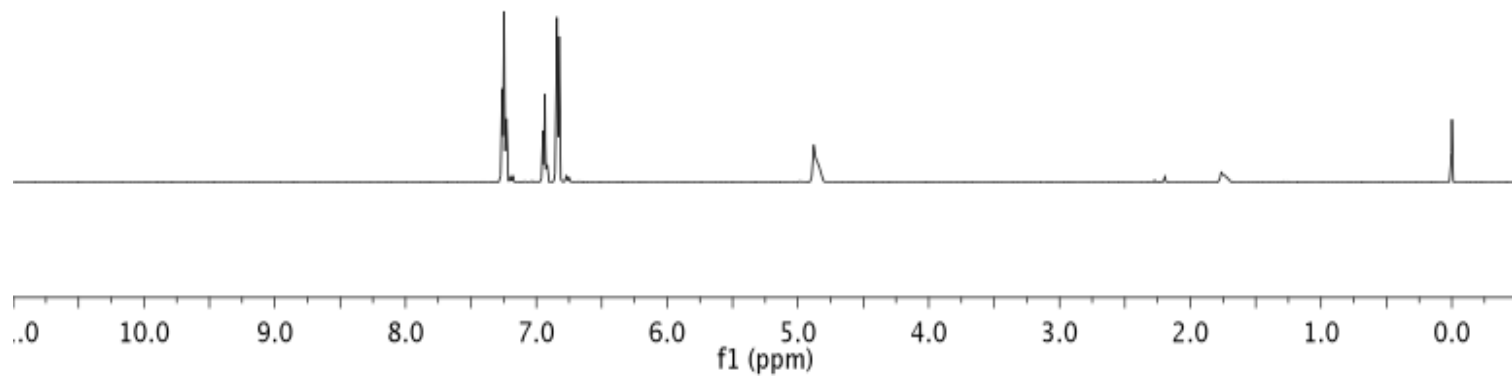

**<sup>1</sup>H NMR (500 MHz, CDCl<sub>3</sub>) Spectrum of Phenol (1a)**

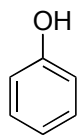

(1a)

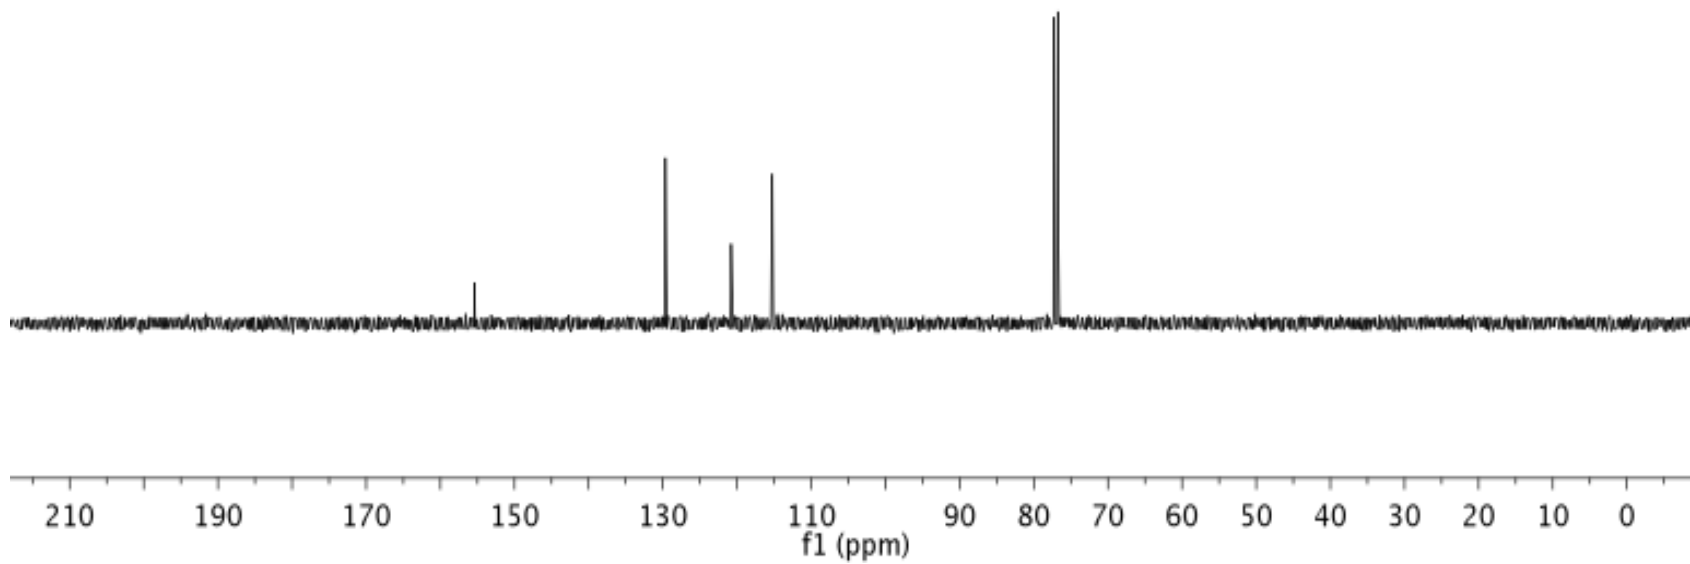

$^{13}\text{C}$  NMR (128.5 MHz,  $\text{CDCl}_3$ ) Spectrum of Phenol (1a)

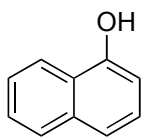

**(1b)**

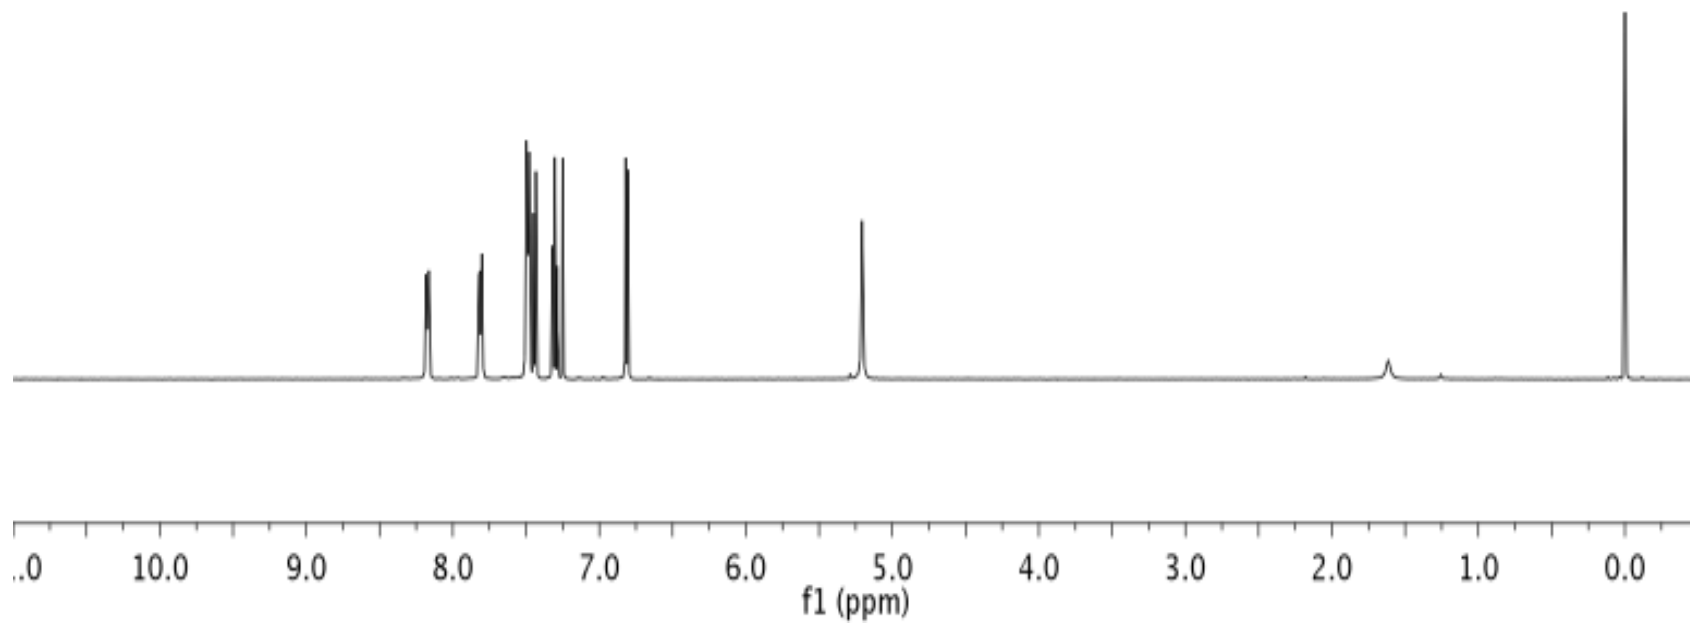

$^1\text{H}$  NMR (500 MHz,  $\text{CDCl}_3$ ) Spectrum of Naphthalen-1-ol (1b)

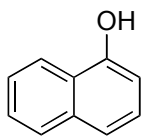

**(1b)**

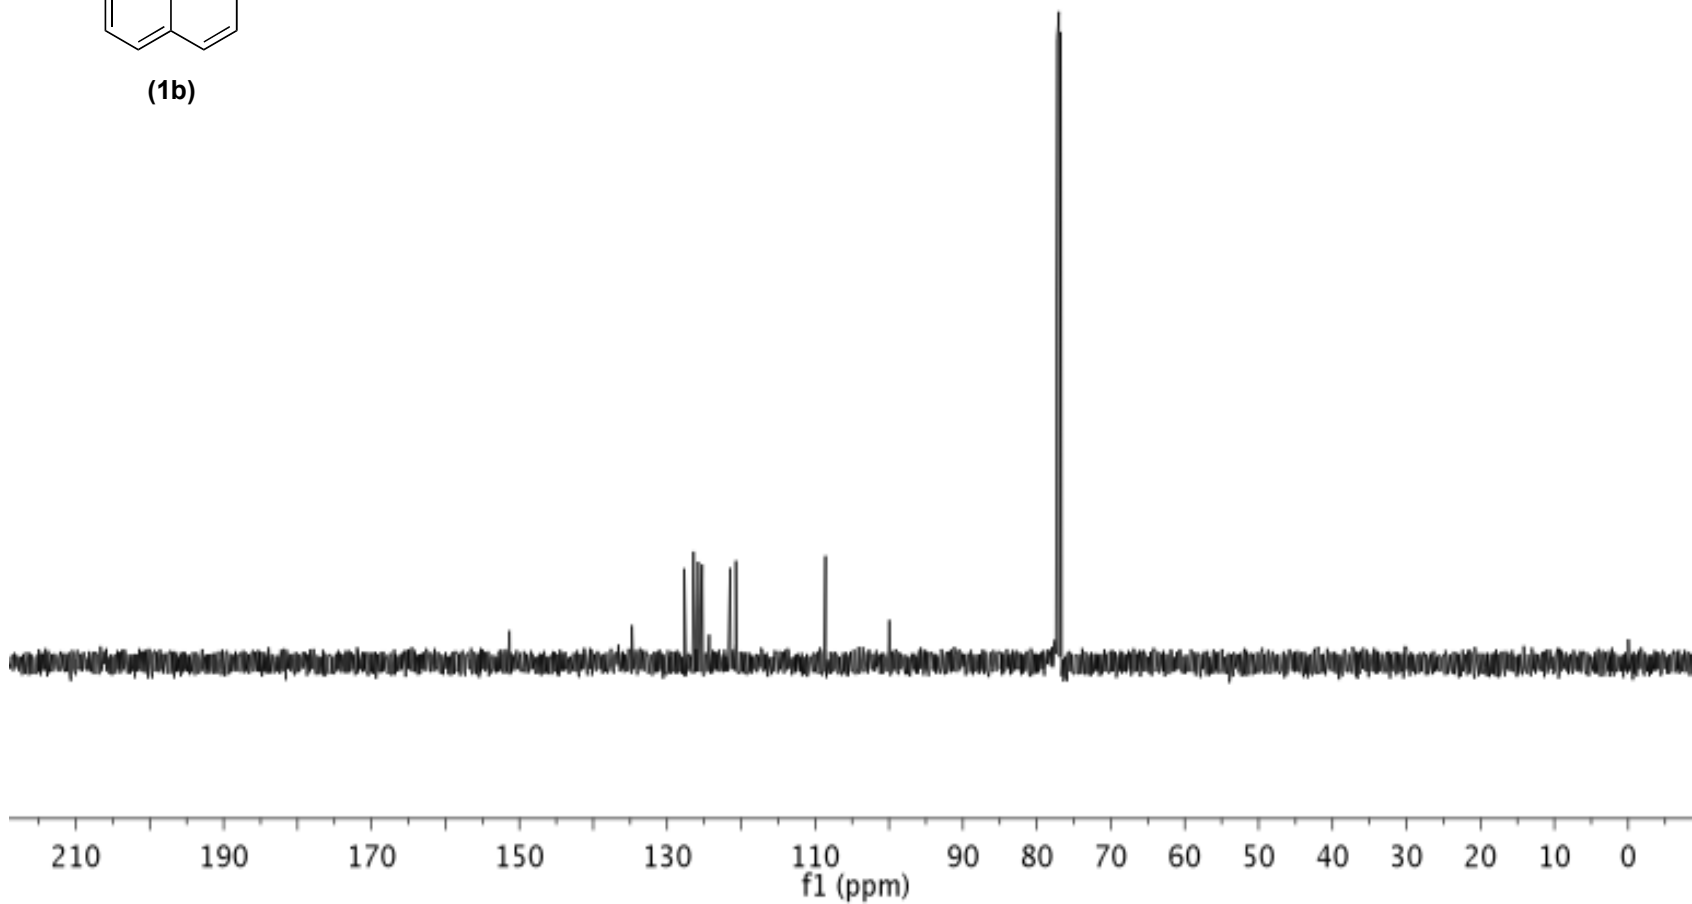

$^{13}\text{C}$  NMR (128.5 MHz,  $\text{CDCl}_3$ ) Spectrum of Naphthalen-1-ol (1b)

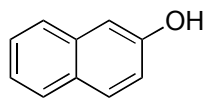

(1c)

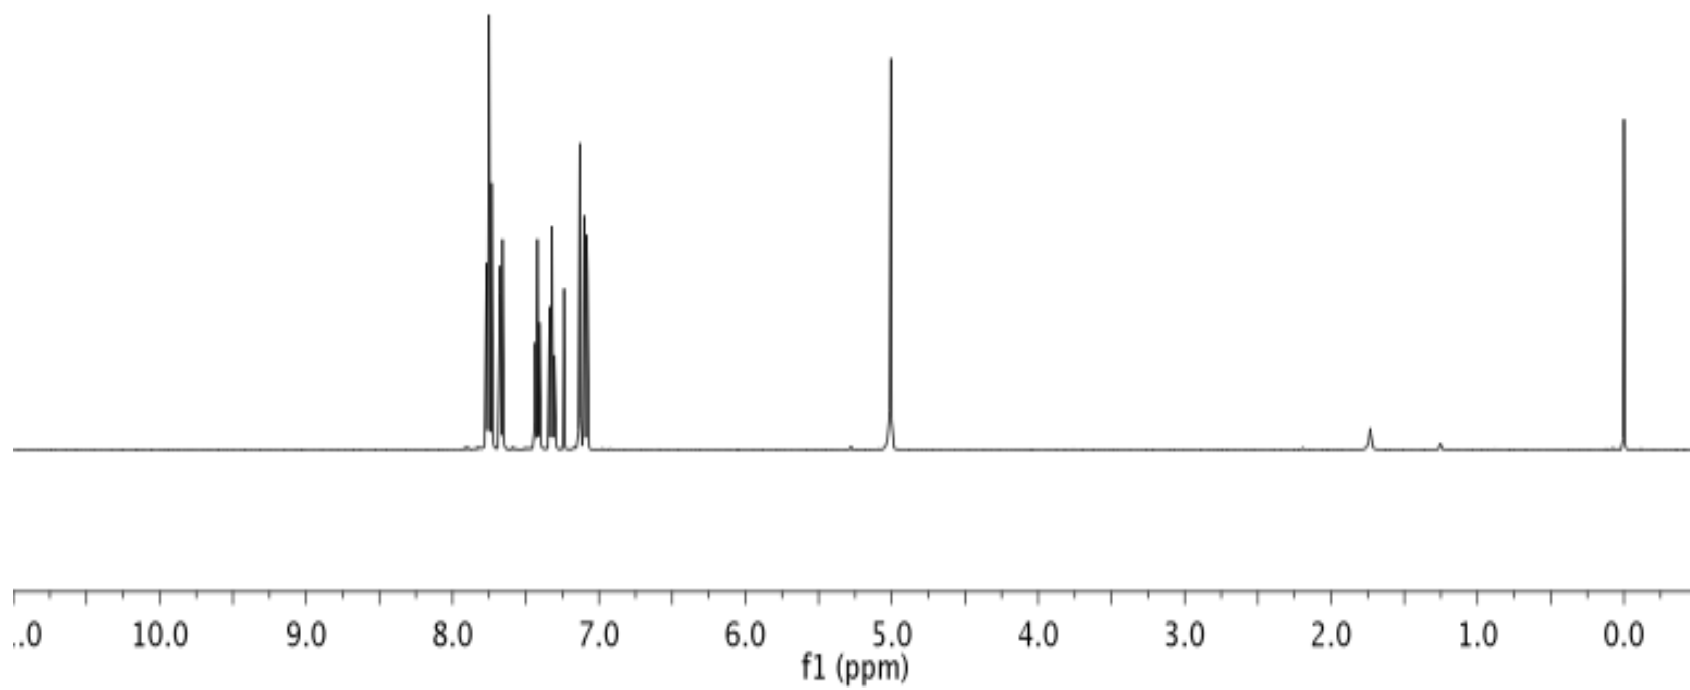

<sup>1</sup>H NMR (500 MHz, CDCl<sub>3</sub>) Spectrum of Naphthalen-2-ol (1c)

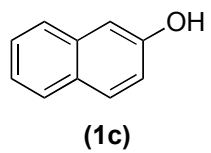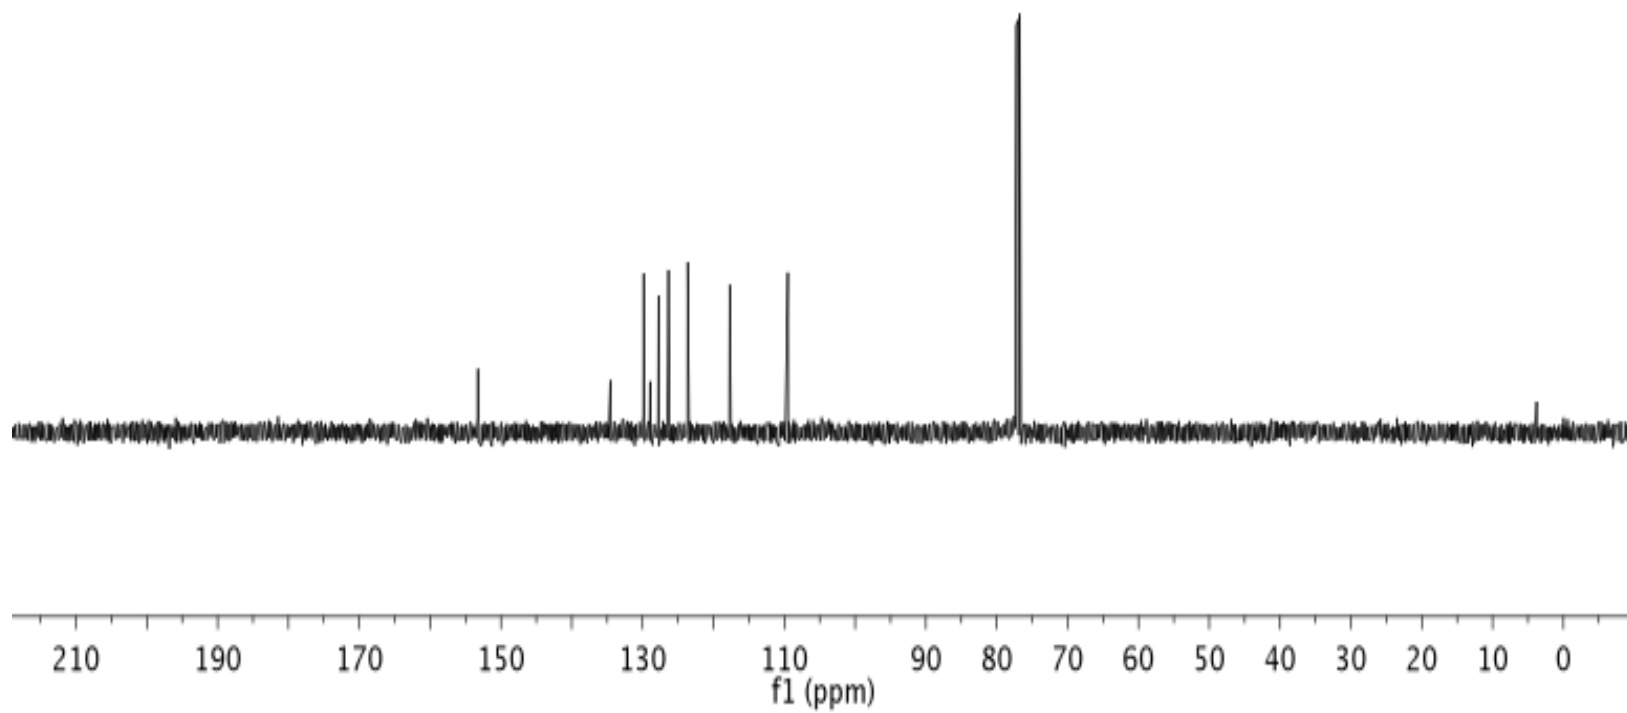

$^{13}\text{C}$  NMR (128.5 MHz,  $\text{CDCl}_3$ ) Spectrum of Naphthalen-2-ol (1c)



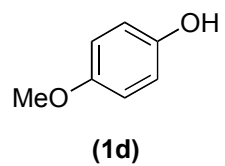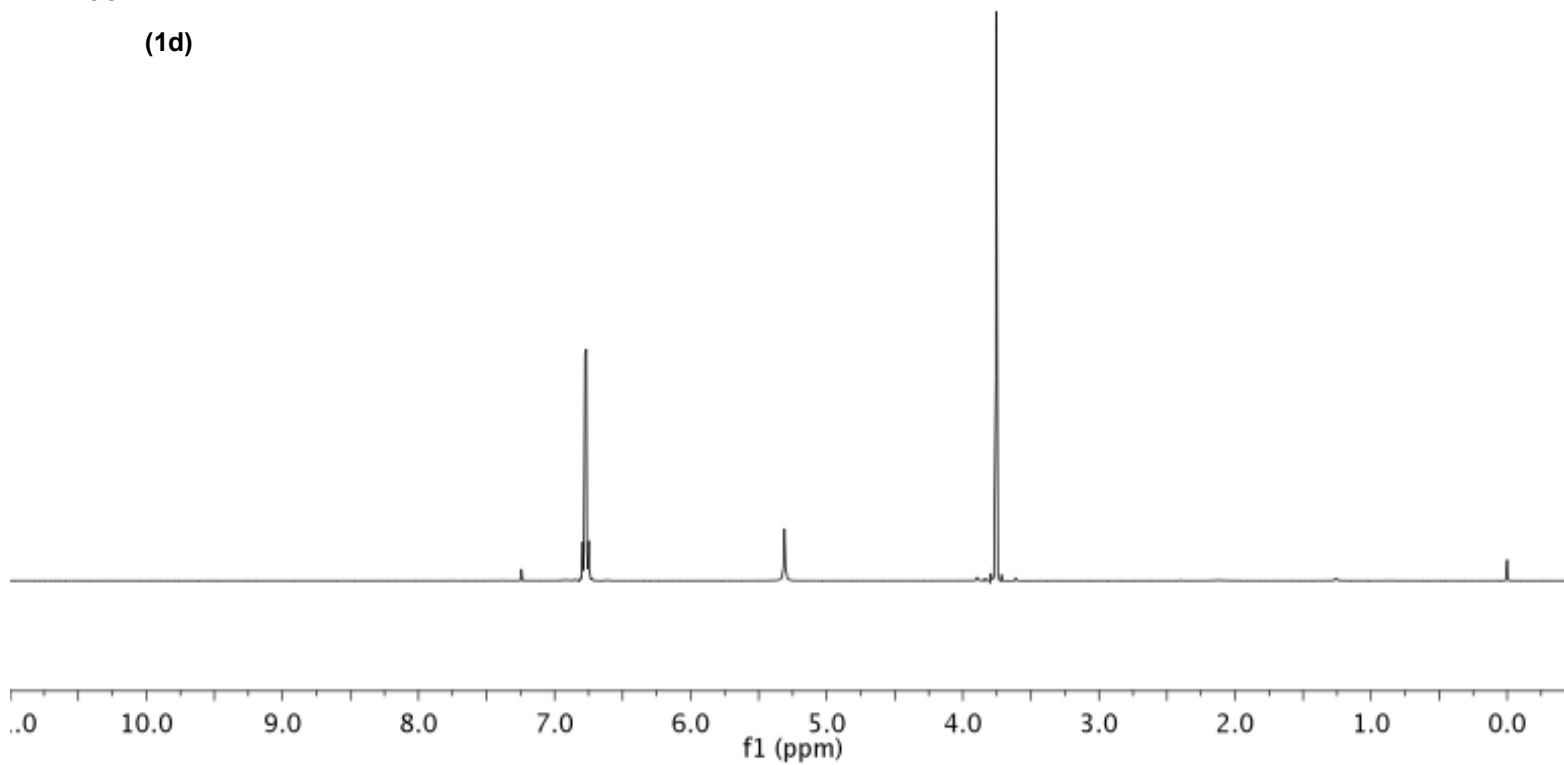

$^1\text{H}$  NMR (500 MHz,  $\text{CDCl}_3$ ) Spectrum of 4-Methoxyphenol (1d)

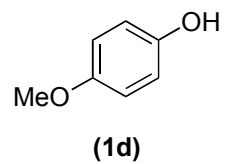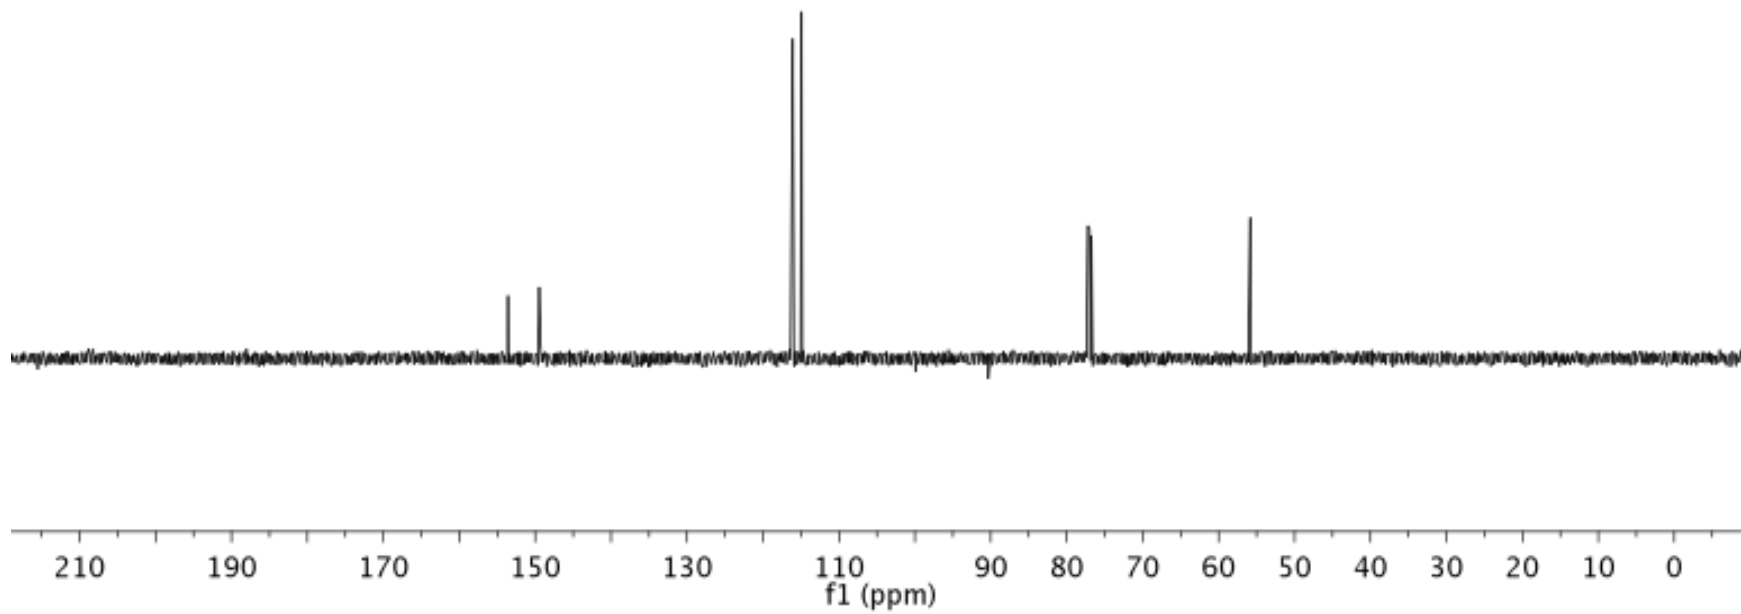

$^{13}\text{C}$  NMR (128.5 MHz,  $\text{CDCl}_3$ ) Spectrum of 4-Methoxyphenol (1d)

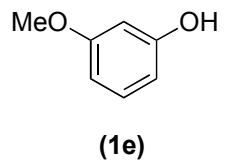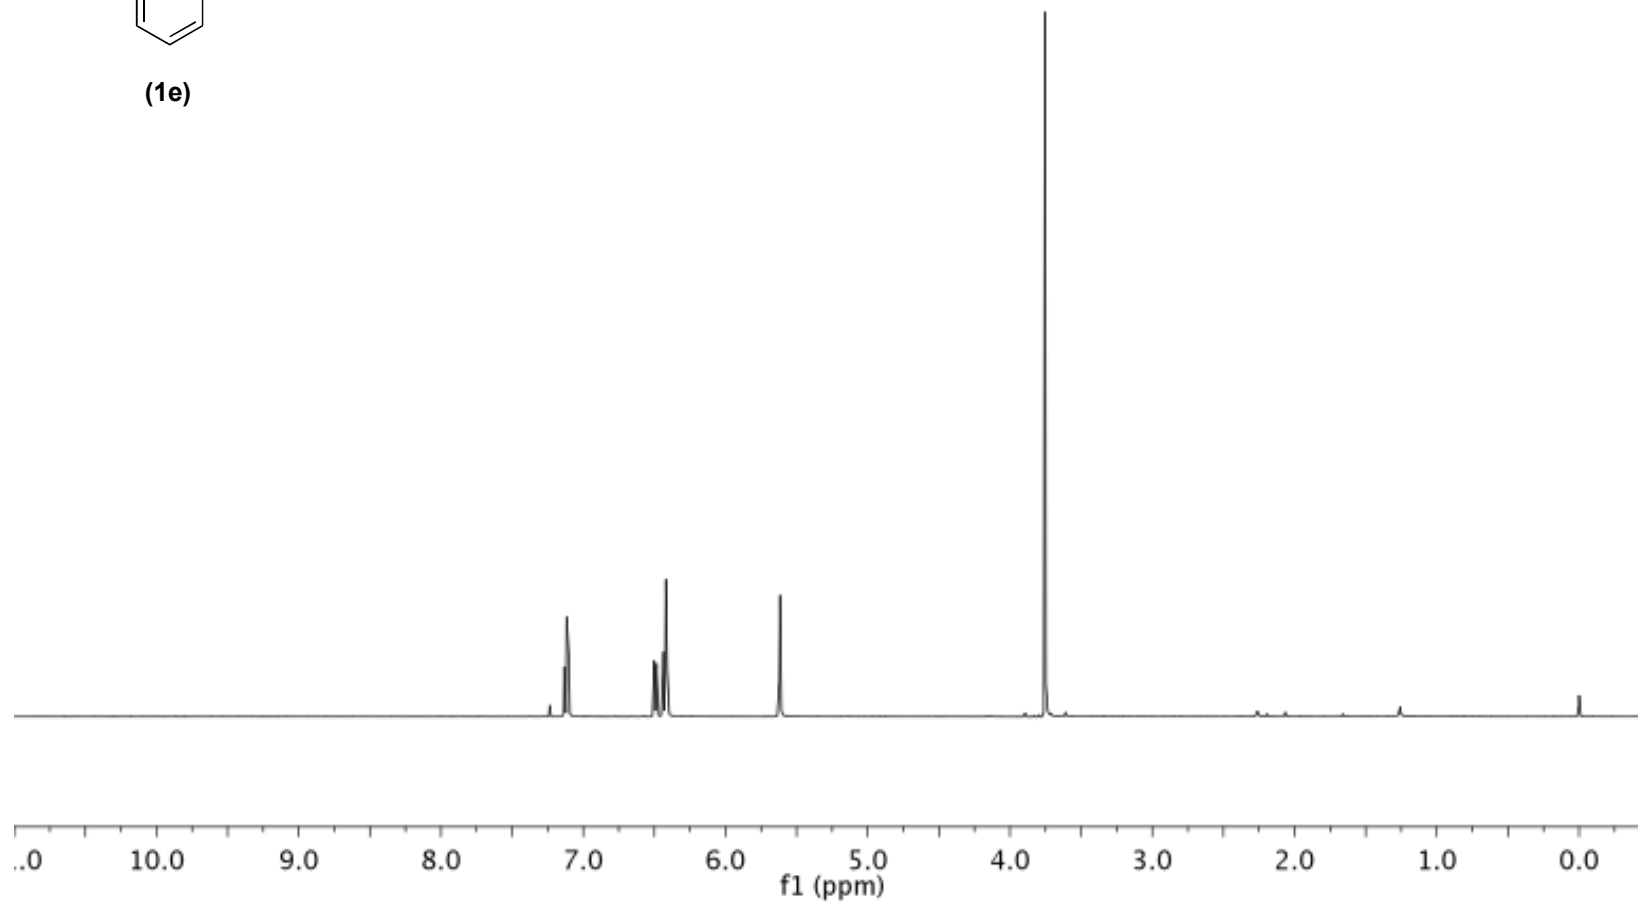

$^1\text{H}$  NMR (500 MHz,  $\text{CDCl}_3$ ) Spectrum of 3-Methoxyphenol (1e)

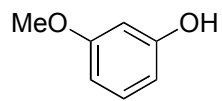

(1e)

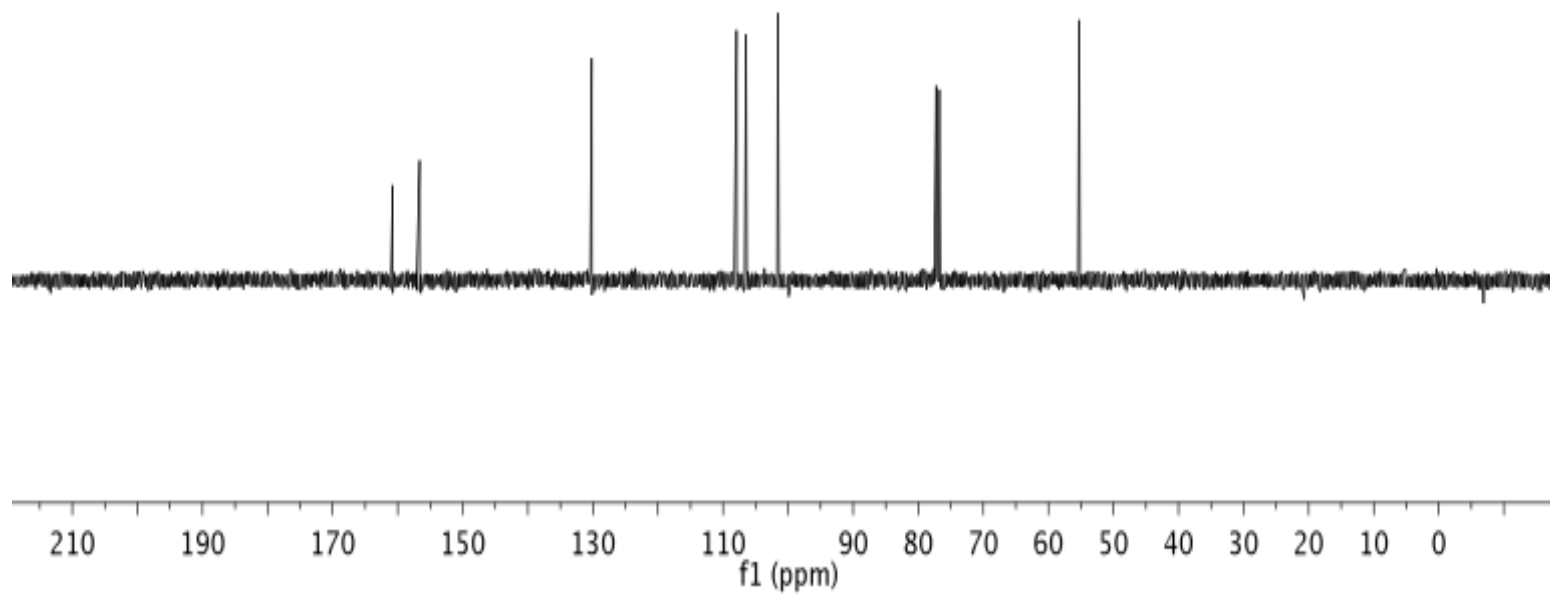

<sup>13</sup>C NMR (128.5 MHz, CDCl<sub>3</sub>) Spectrum of 3-Methoxyphenol (1e)

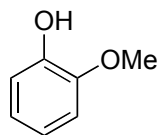

(1f)

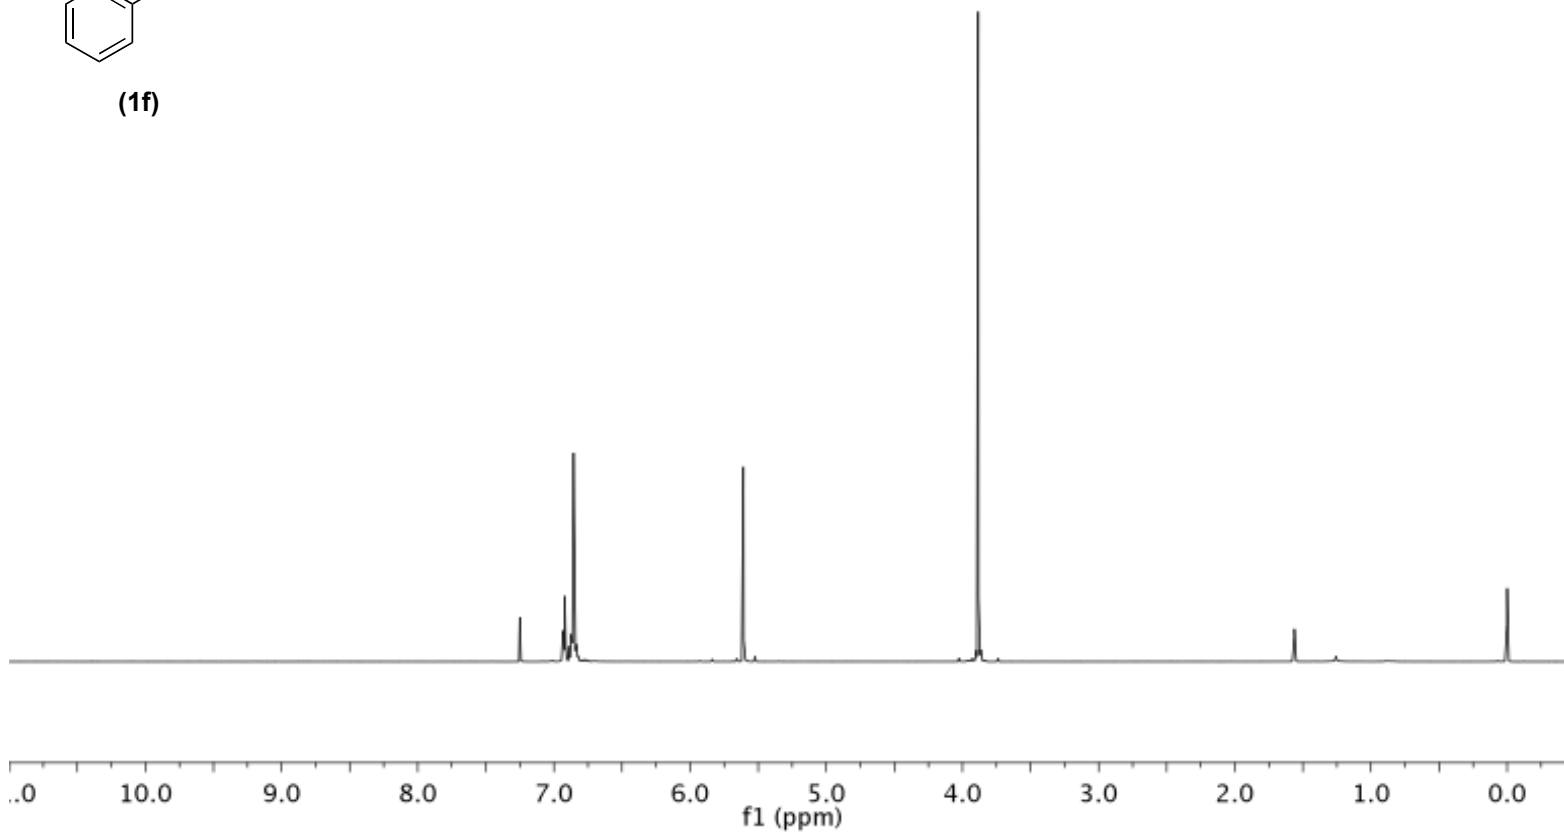

<sup>1</sup>H NMR (500 MHz, CDCl<sub>3</sub>) Spectrum of 2-Methoxyphenol (1f)

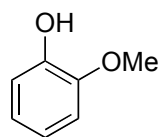

(1f)

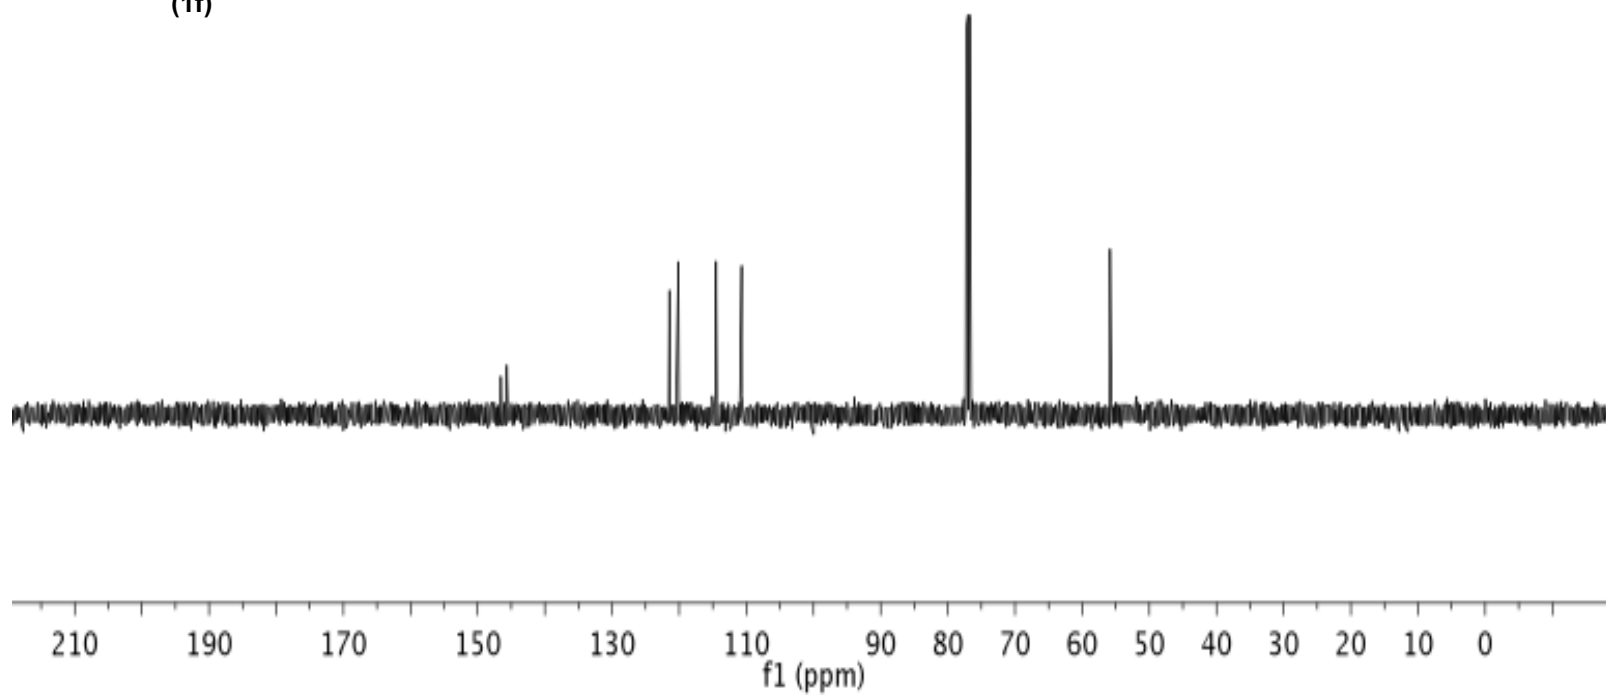

$^{13}\text{C}$  NMR (128.5 MHz,  $\text{CDCl}_3$ ) Spectrum of 2-Methoxyphenol (1f)

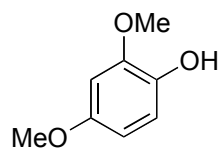

**(1g)**

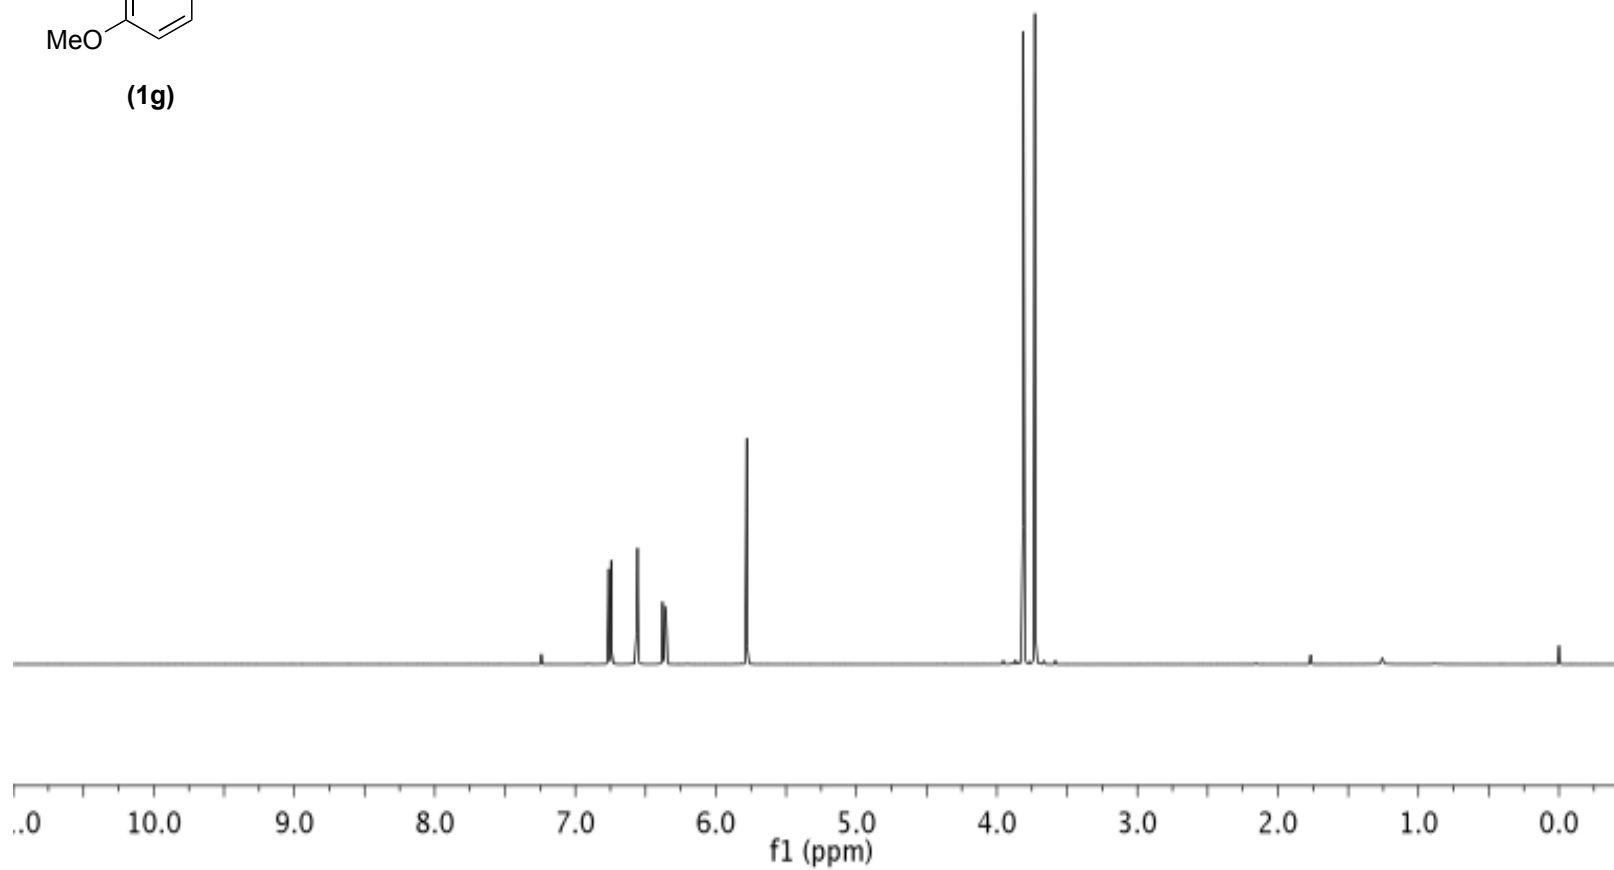

**<sup>1</sup>H NMR (500 MHz, CDCl<sub>3</sub>) Spectrum of 2,4-Dimethoxyphenol (1g)**

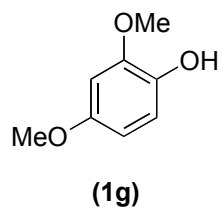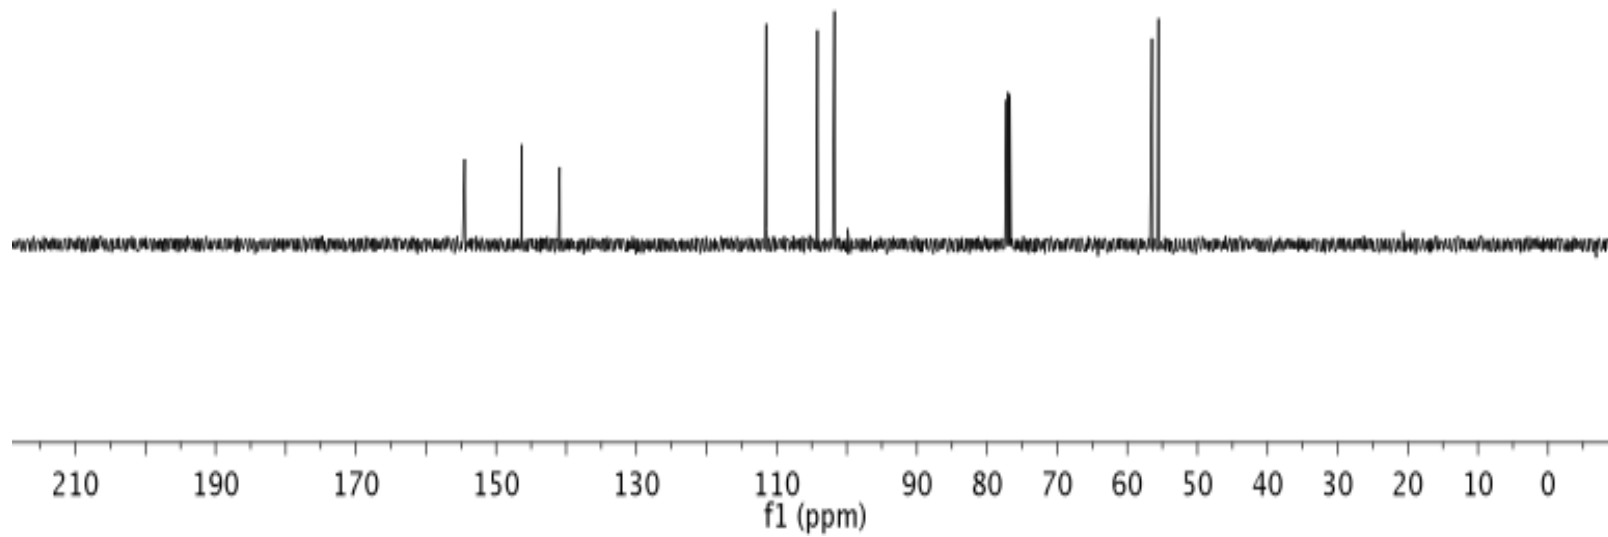

<sup>13</sup>C NMR (128.5 MHz, CDCl<sub>3</sub>) Spectrum of 2,4-Dimethoxyphenol (1g)



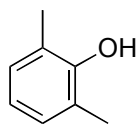

(1h)

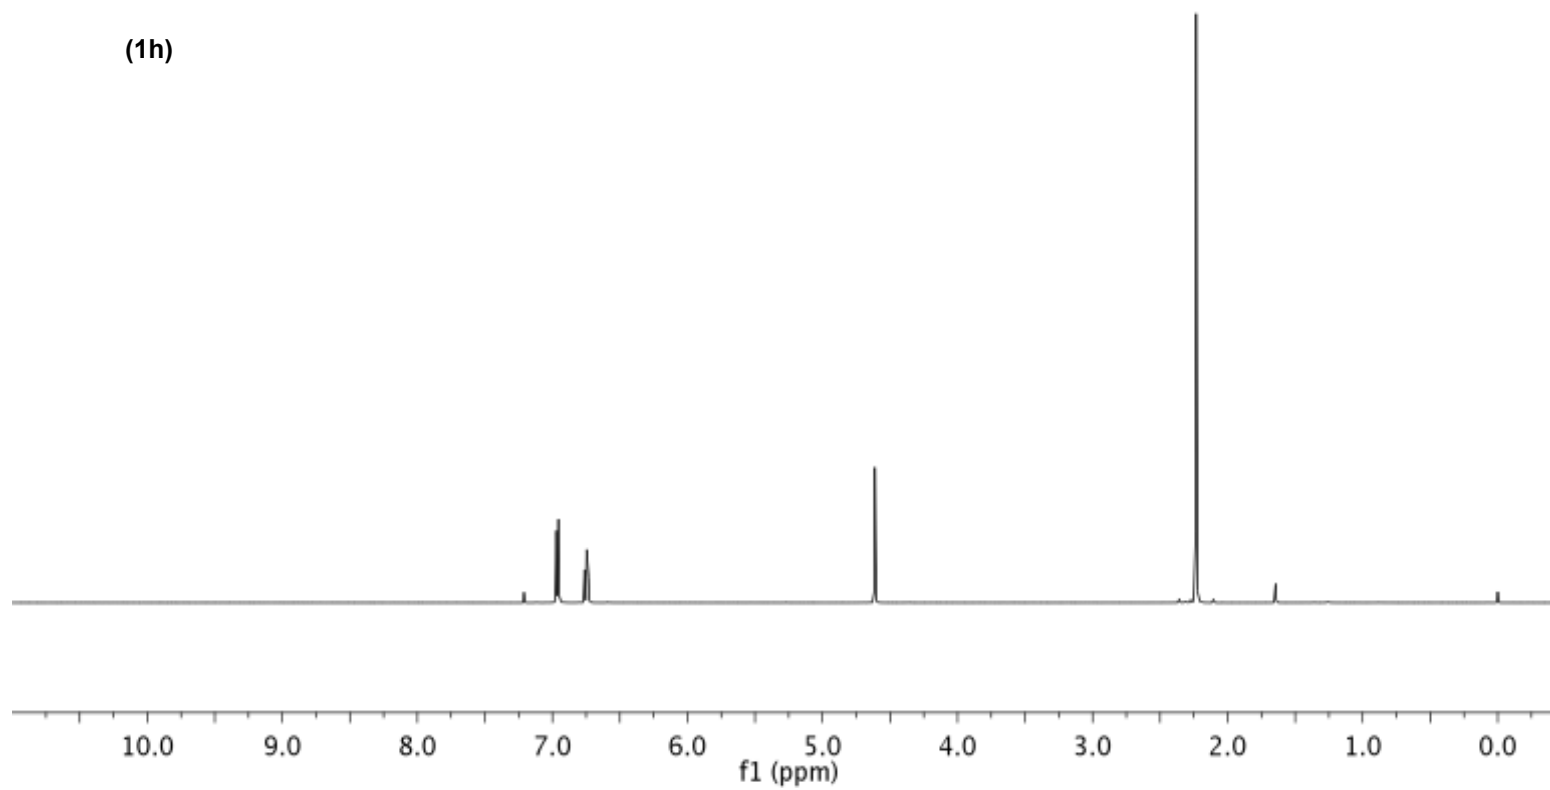

<sup>1</sup>H NMR (500 MHz, CDCl<sub>3</sub>) Spectrum of 2,6-Dimethylphenol (1h)

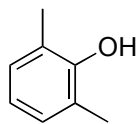

(1h)

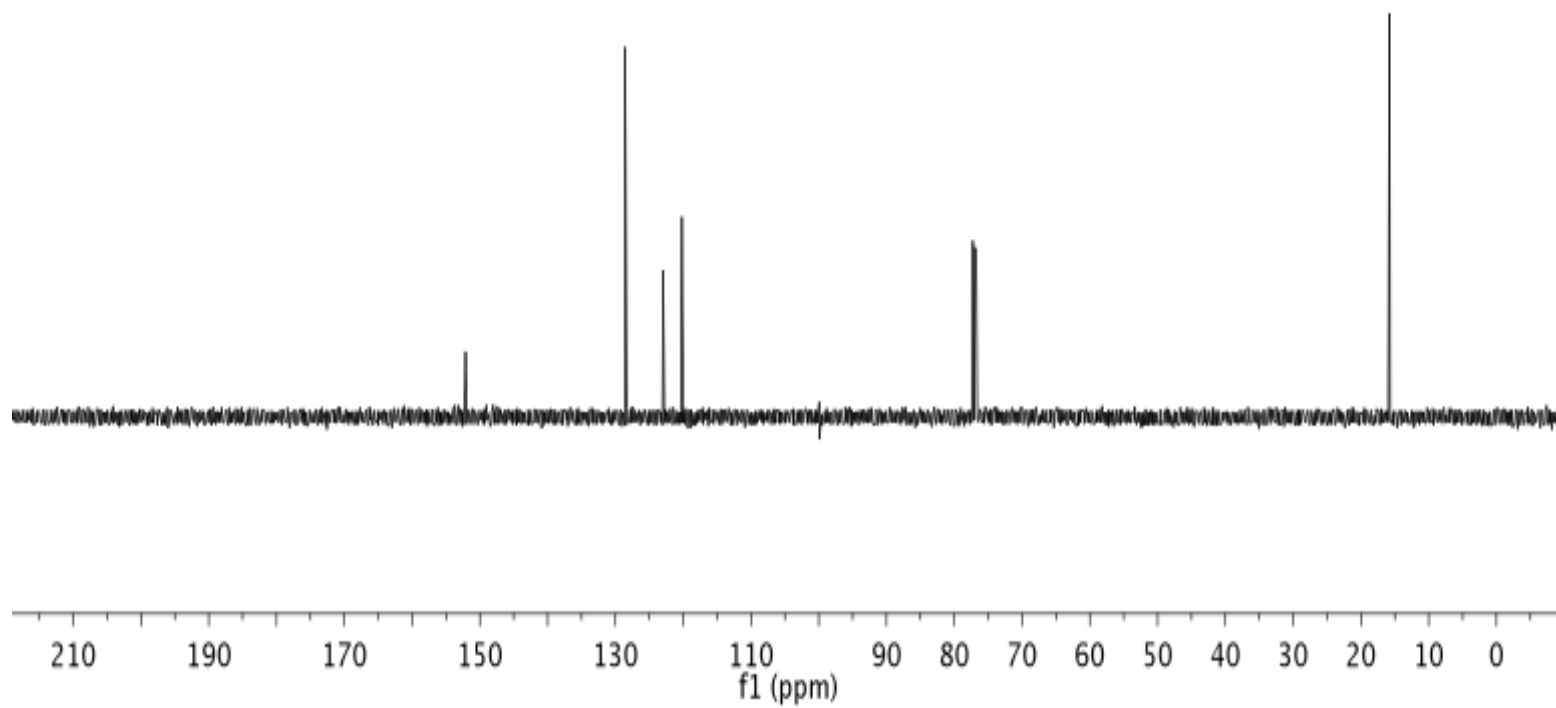

$^{13}\text{C}$  NMR (128.5 MHz, CDCl<sub>3</sub>) Spectrum of 2,6-Dimethylphenol (1h)

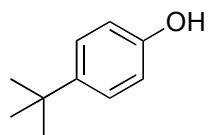

(1i)

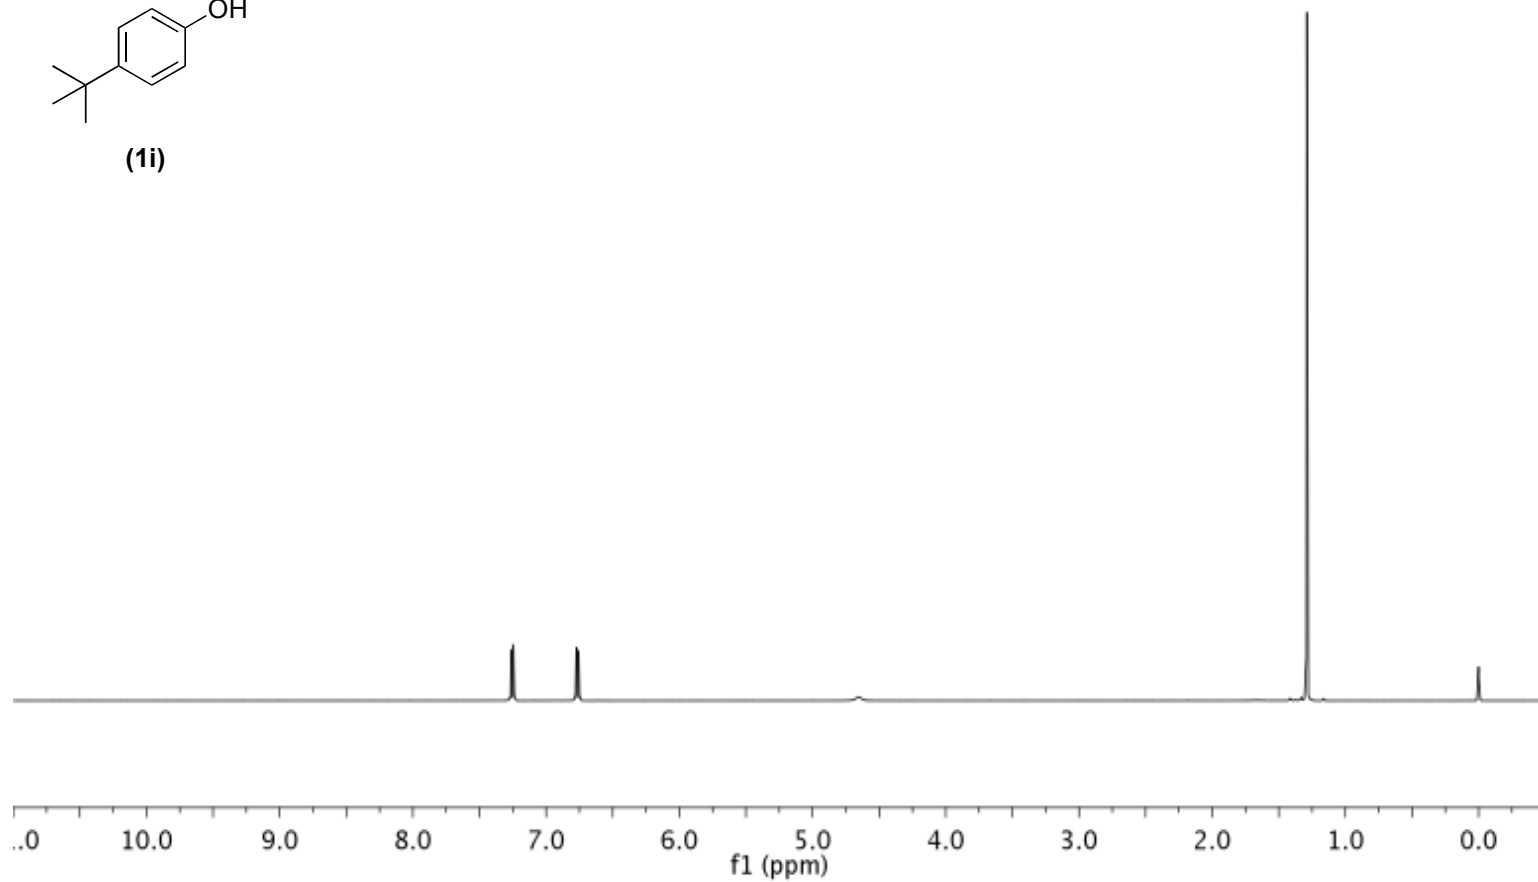

$^1\text{H}$  NMR (500 MHz,  $\text{CDCl}_3$ ) Spectrum of 4-(*tert*-Butyl)phenol (1i)

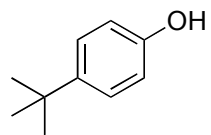

(1i)

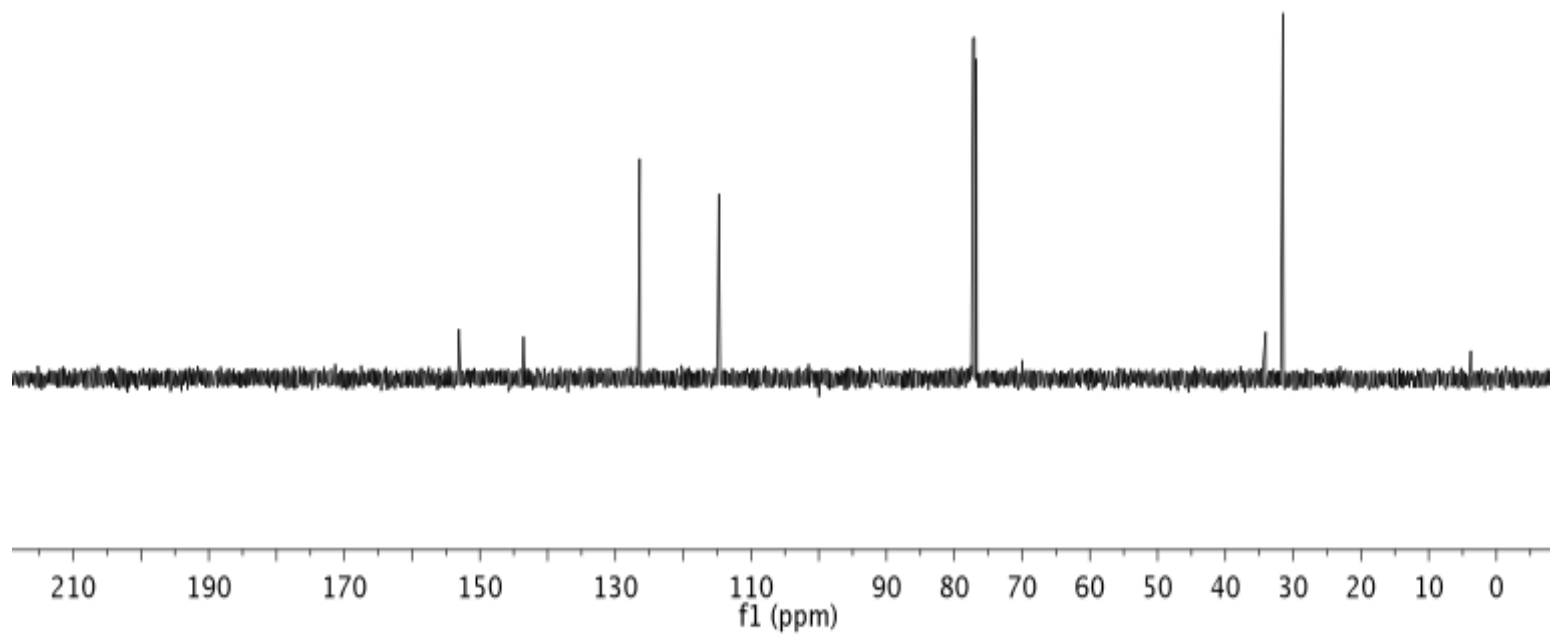

$^{13}\text{C}$  NMR (128.5 MHz,  $\text{CDCl}_3$ ) Spectrum of 4-*tert*-Butylphenol (1i)

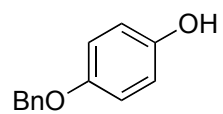

(1j)

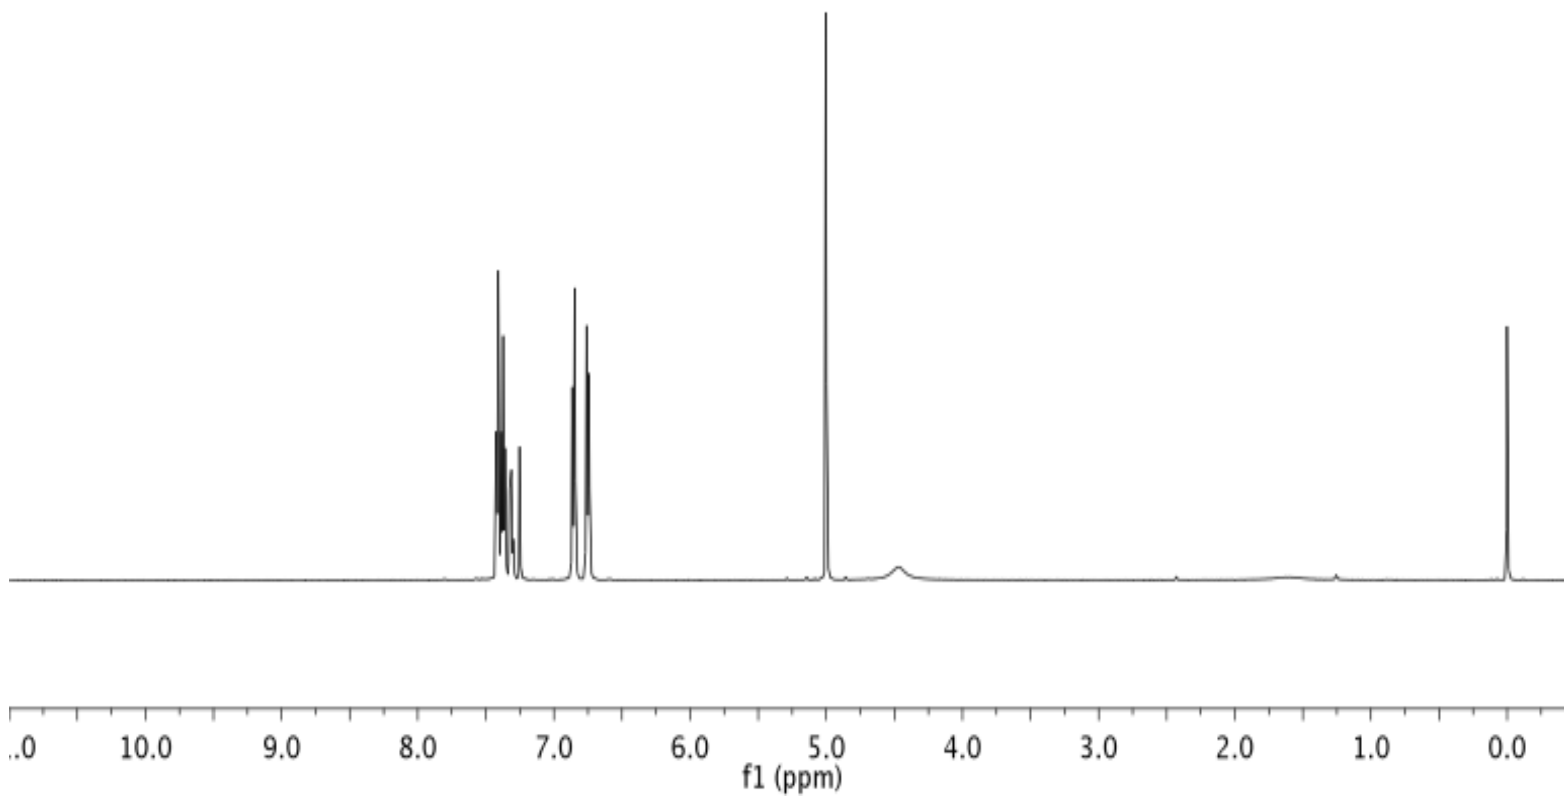

$^1\text{H}$  NMR (500 MHz,  $\text{CDCl}_3$ ) Spectrum of 4-(Benzyloxy)phenol (1j)

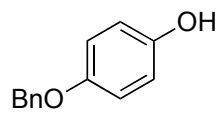

(1j)

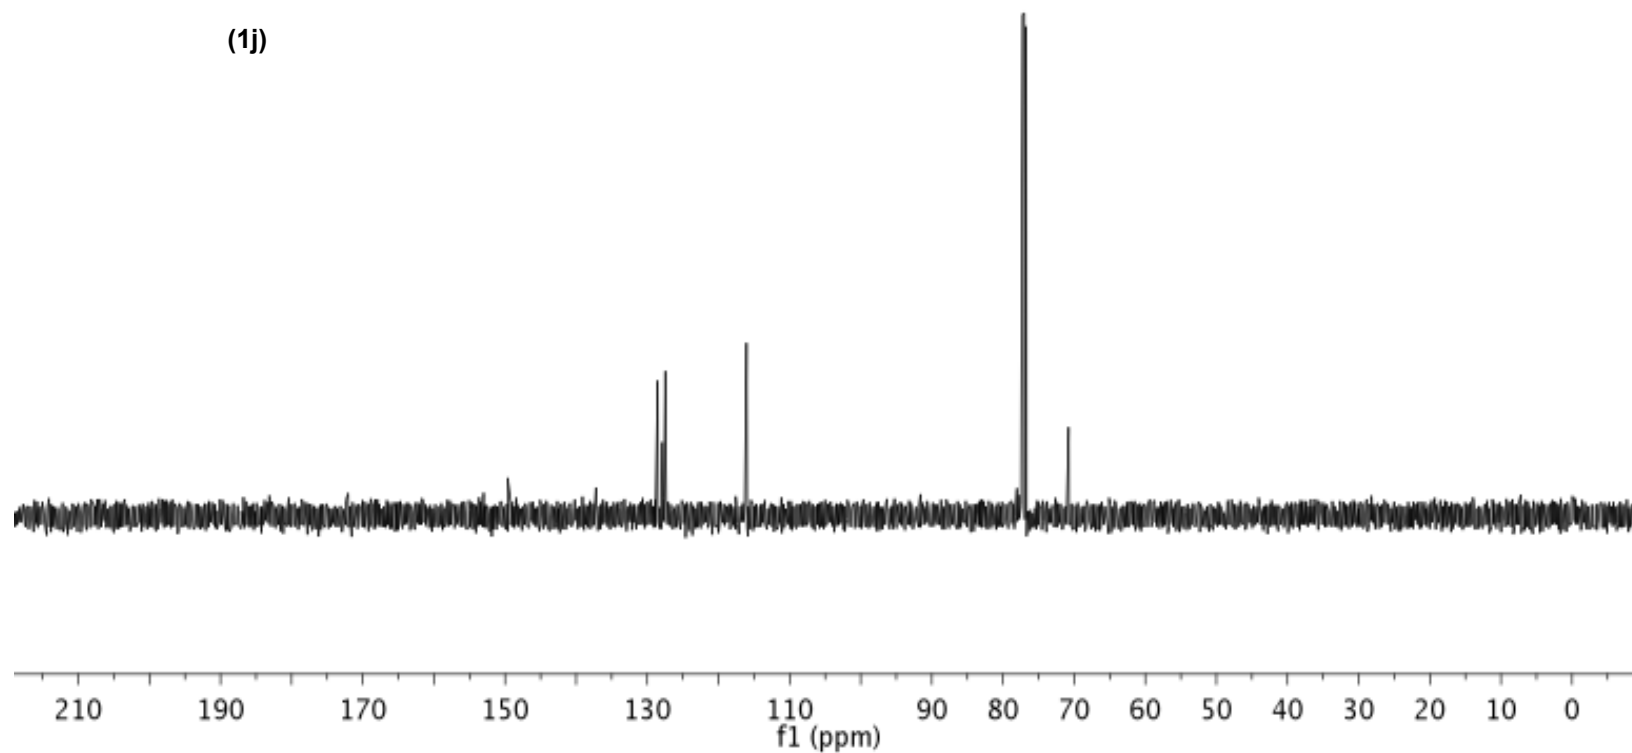

$^{13}\text{C}$  NMR (128.5 MHz, CDCl<sub>3</sub>) Spectrum of 4-(Benzyloxy)phenol (1j)

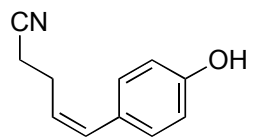

**(1k)**

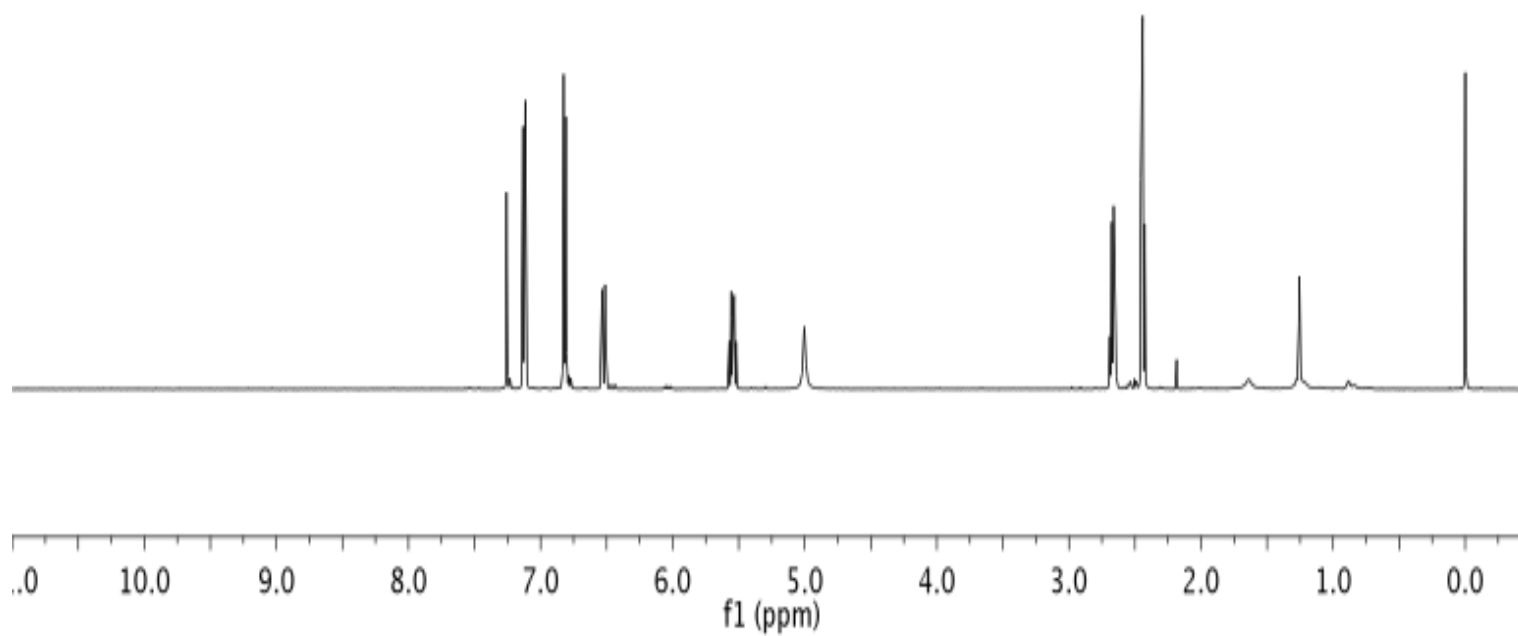

**<sup>1</sup>H NMR (500 MHz, CDCl<sub>3</sub>) Spectrum of (Z)-5-(4-Hydroxyphenyl)pent-4-enitrile (1k)**

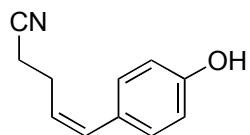

(1k)

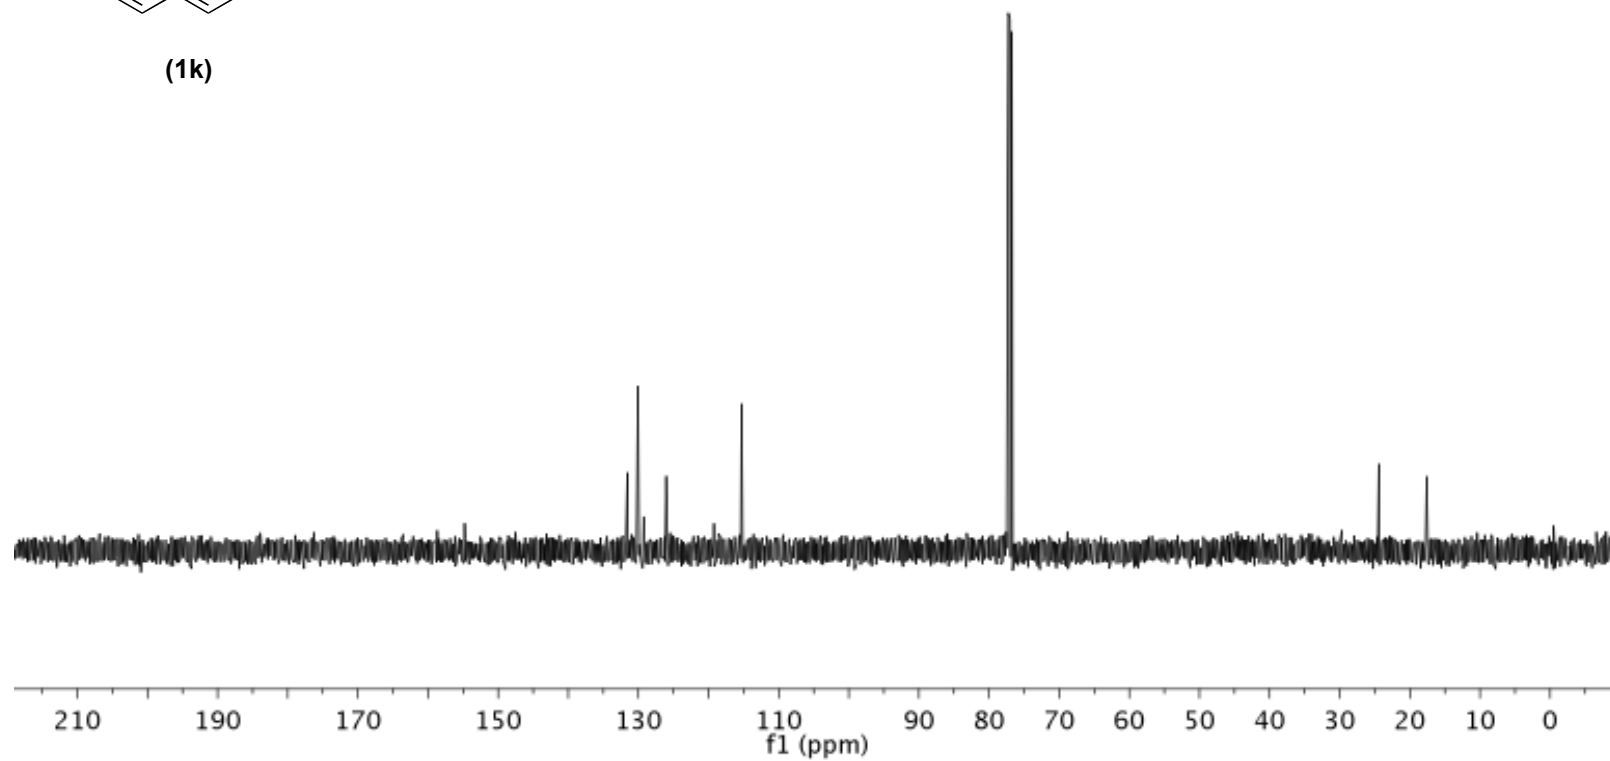

$^{13}\text{C}$  NMR (128.5 MHz,  $\text{CDCl}_3$ ) Spectrum of (Z)-5-(4-Hydroxyphenyl)pent-4-enitrile (1k)



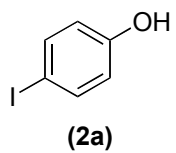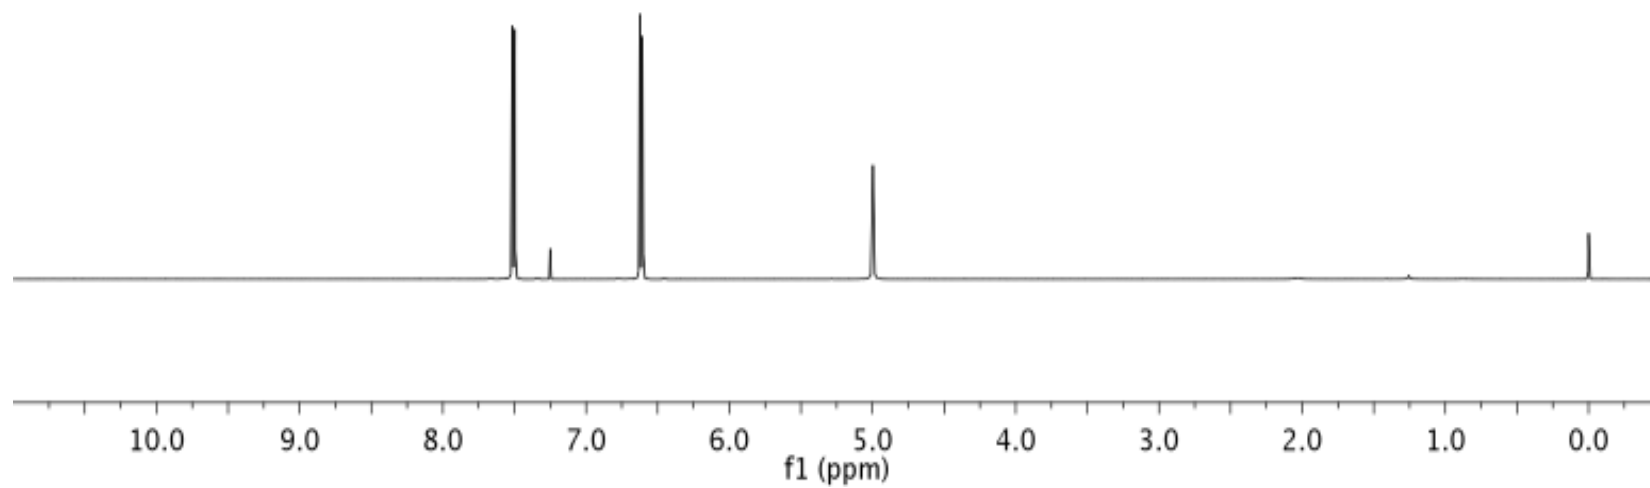

<sup>1</sup>H NMR (500 MHz, CDCl<sub>3</sub>) Spectrum of 4-Iodophenol (2a)

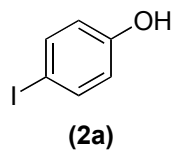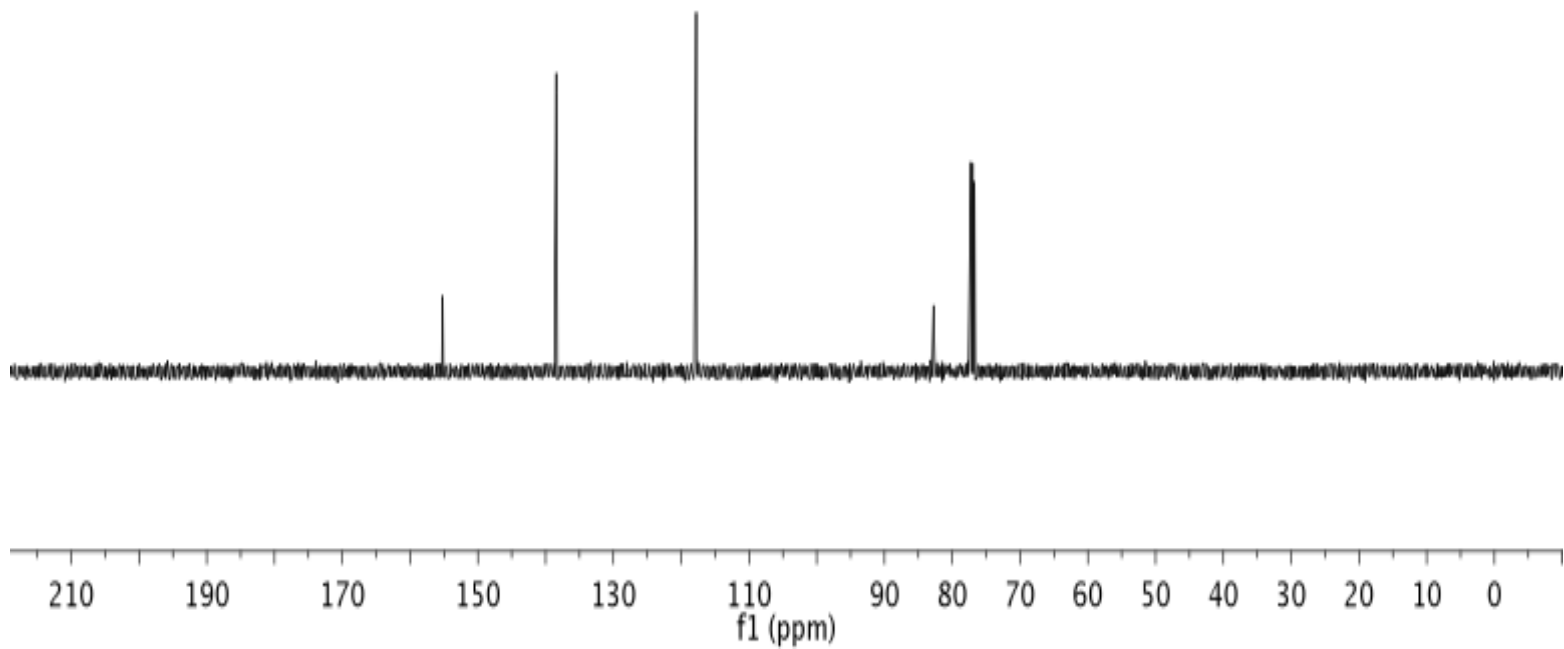

$^{13}\text{C}$  NMR (128.5 MHz,  $\text{CDCl}_3$ ) Spectrum of 4-Iodophenol (2a)

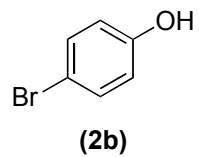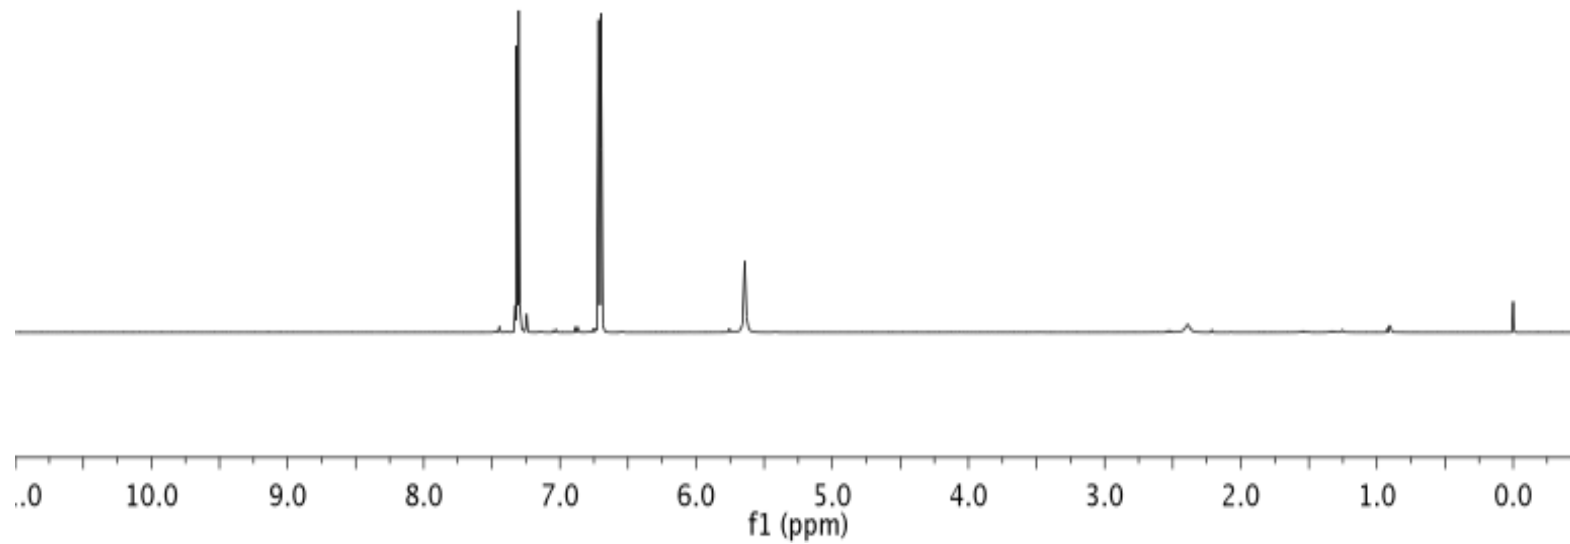

**<sup>1</sup>H NMR (500 MHz, CDCl<sub>3</sub>) Spectrum of 4-Bromophenol (2b)**

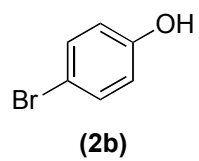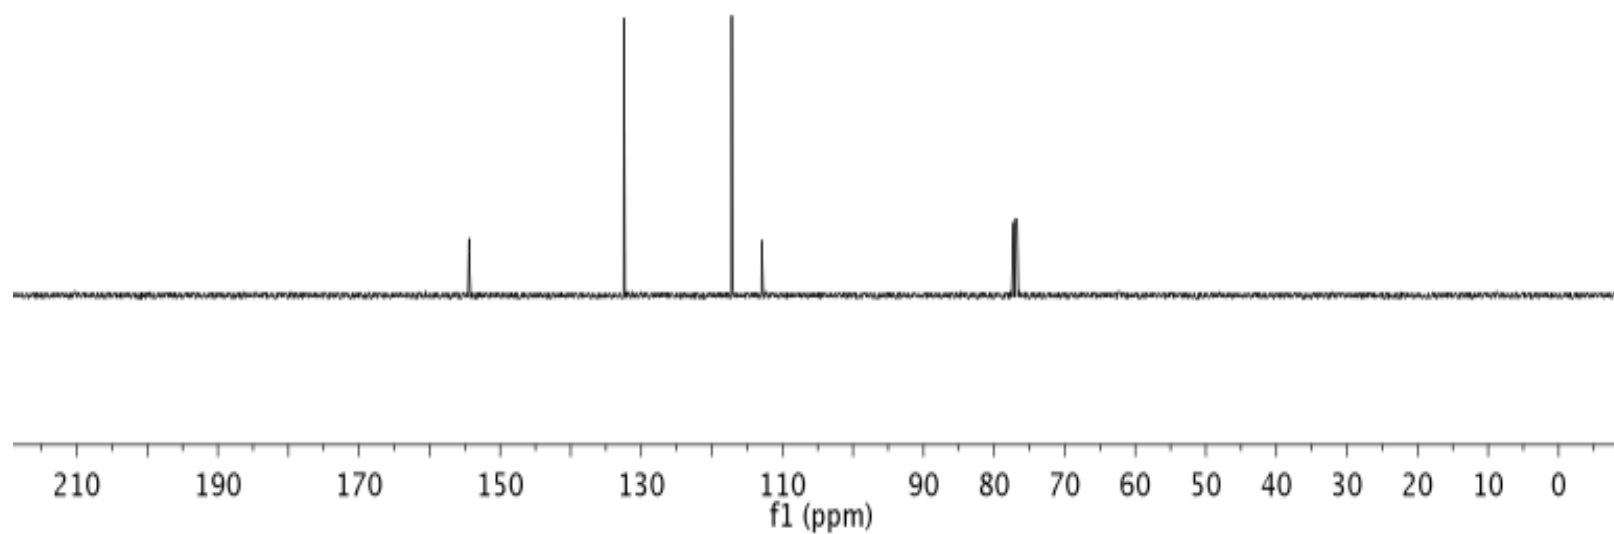

$^{13}\text{C}$  NMR (128.5 MHz,  $\text{CDCl}_3$ ) Spectrum of 4-Bromophenol (2b)

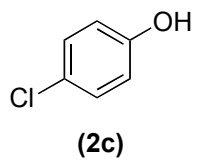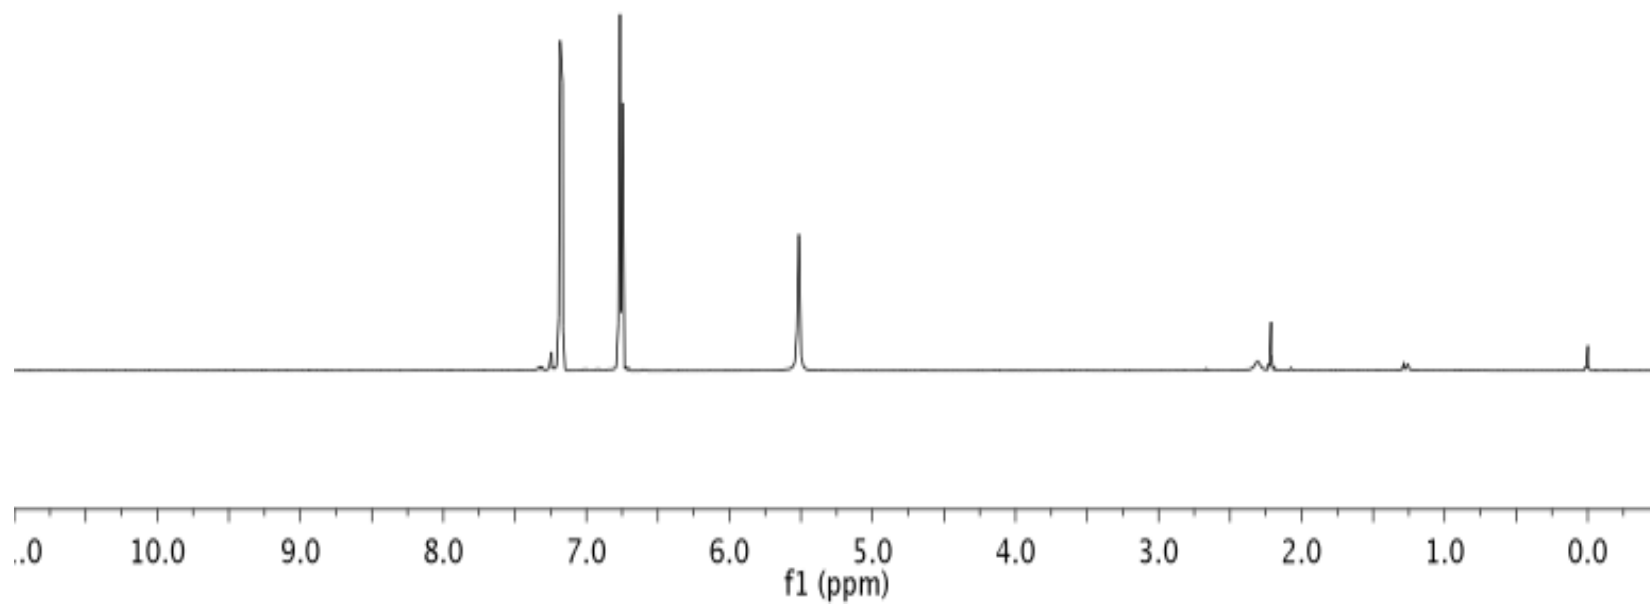

$^1\text{H}$  NMR (500 MHz,  $\text{CDCl}_3$ ) Spectrum of 4-Chlorophenol (2c)

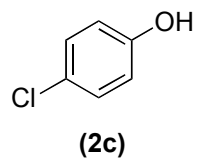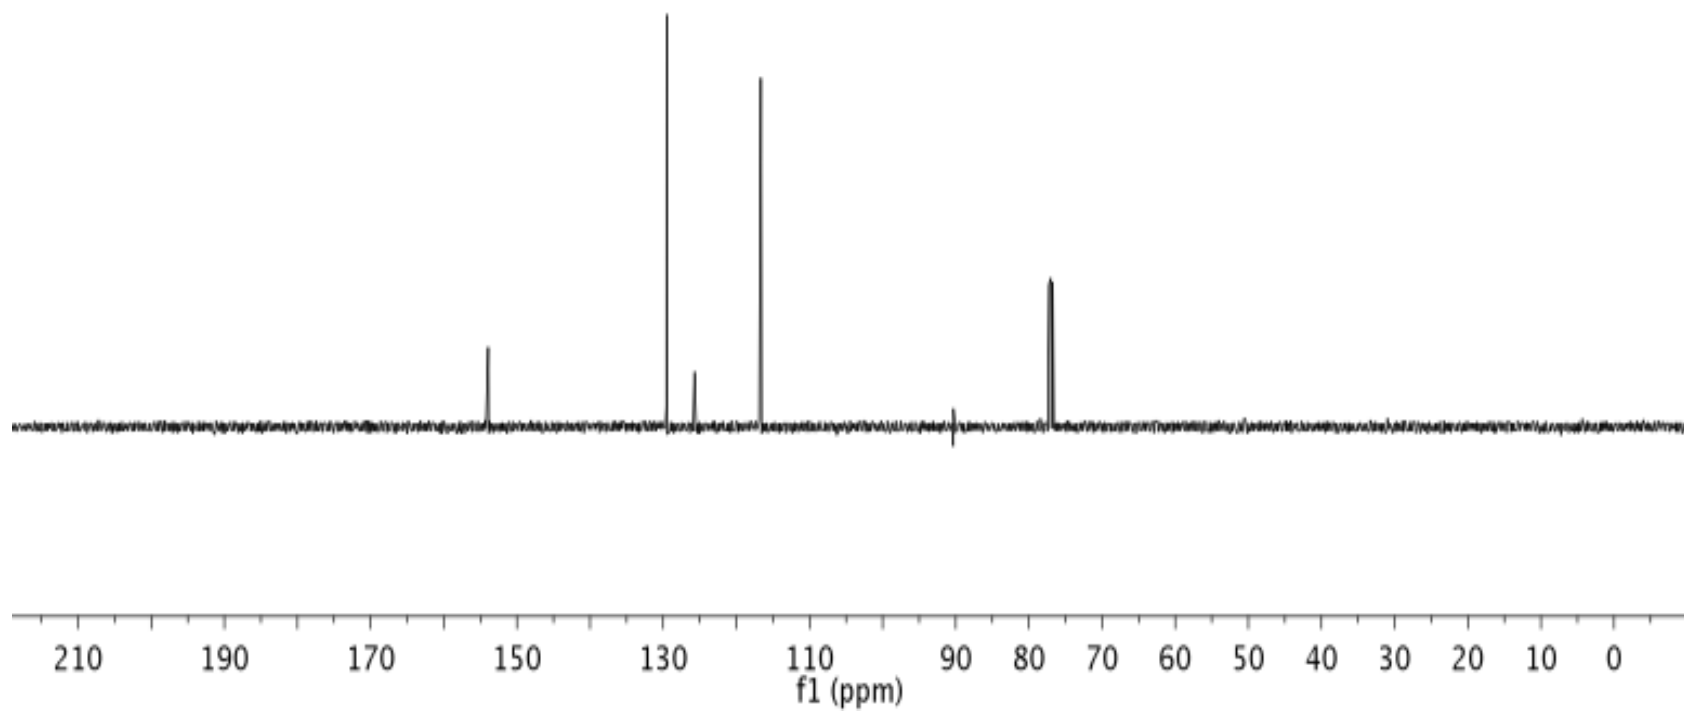

$^{13}\text{C}$  NMR (128.5 MHz, CDCl<sub>3</sub>) Spectrum of 4-Chlorophenol (2c)

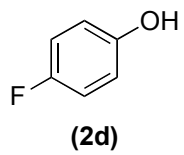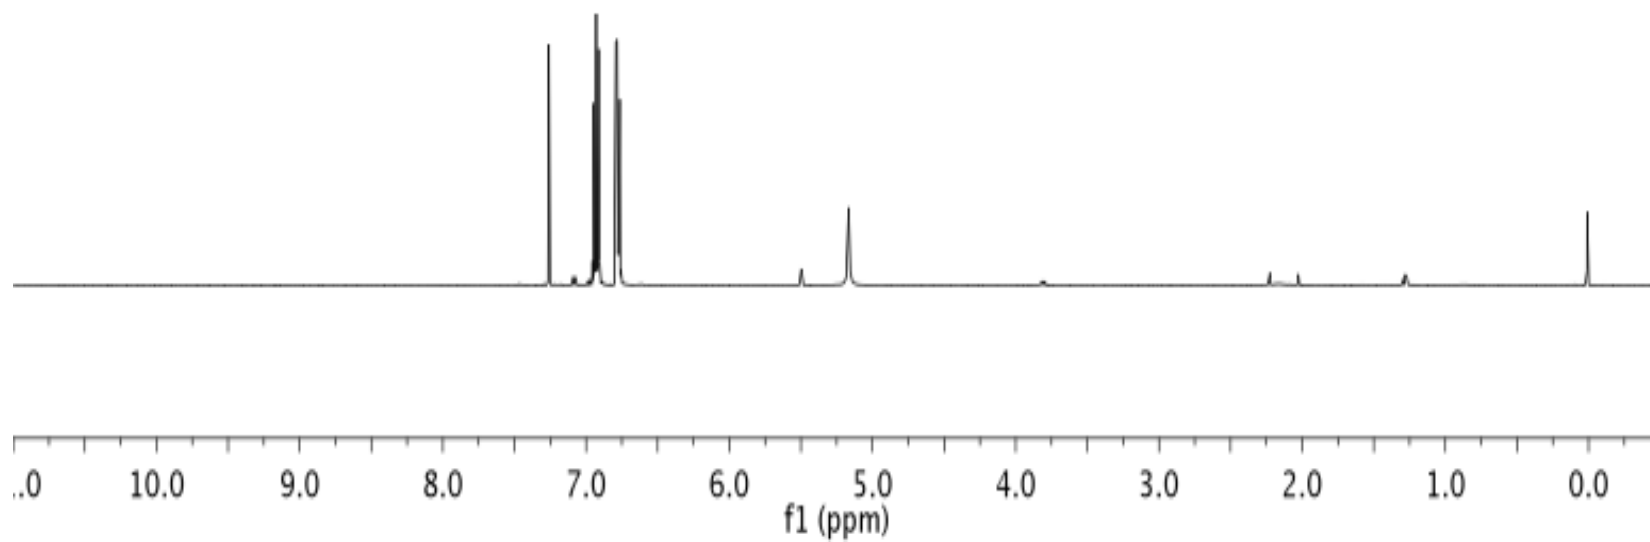

<sup>1</sup>H NMR (500 MHz, CDCl<sub>3</sub>) Spectrum of 4-Fluorophenol (2d)

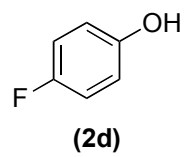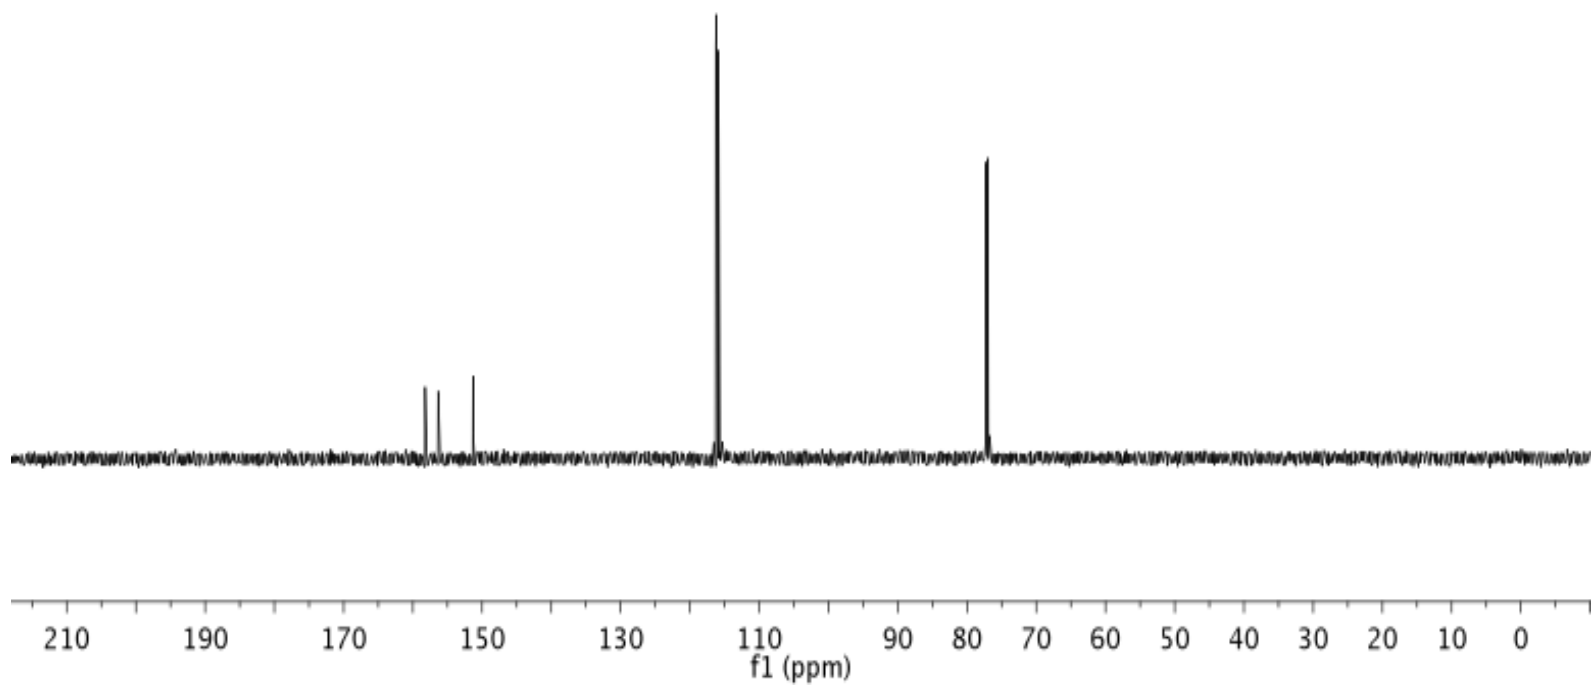

$^{13}\text{C}$  NMR (128.5 MHz,  $\text{CDCl}_3$ ) Spectrum of 4-Fluorophenol (2d)



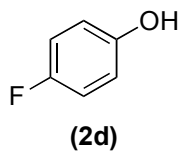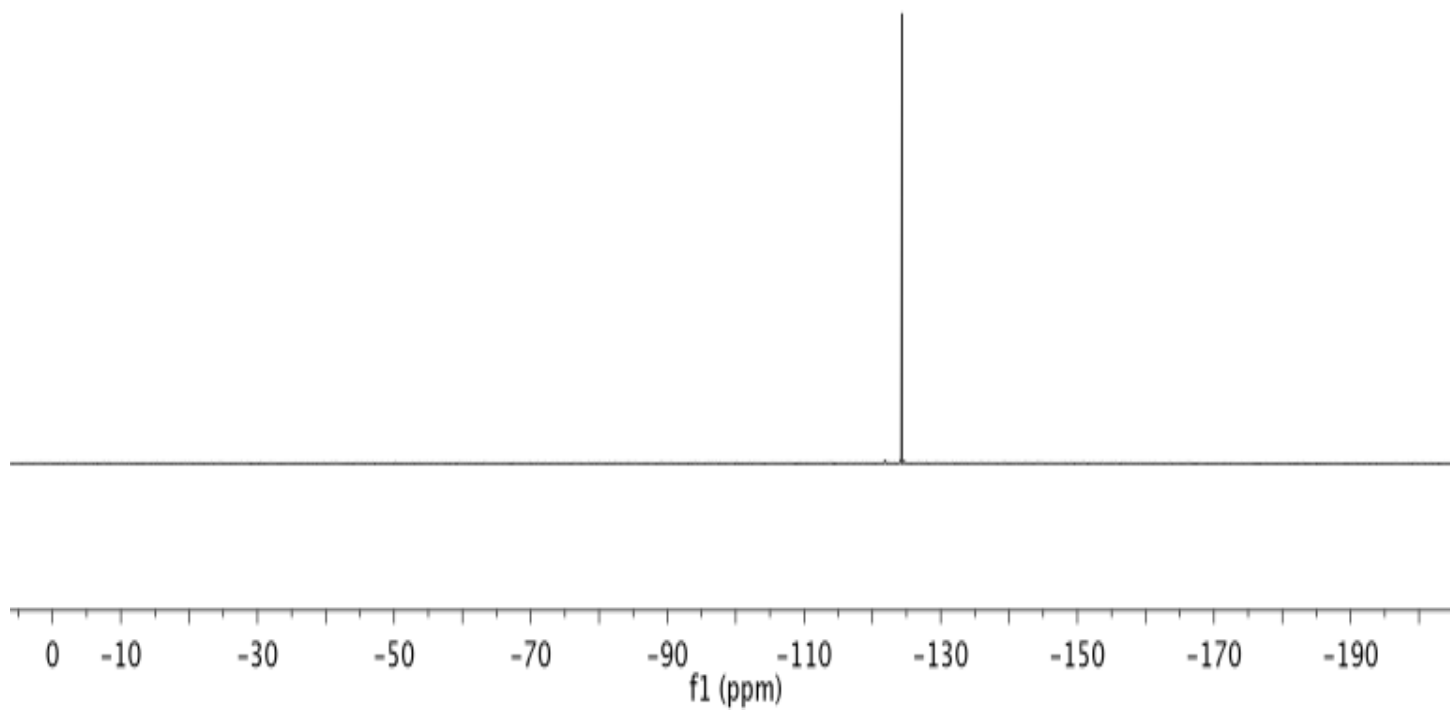

$^{19}\text{F}$  NMR (470.8 MHz,  $\text{CDCl}_3$ ) Spectrum of 4-Fluorophenol (2d)

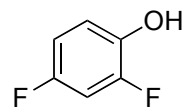

(2e)

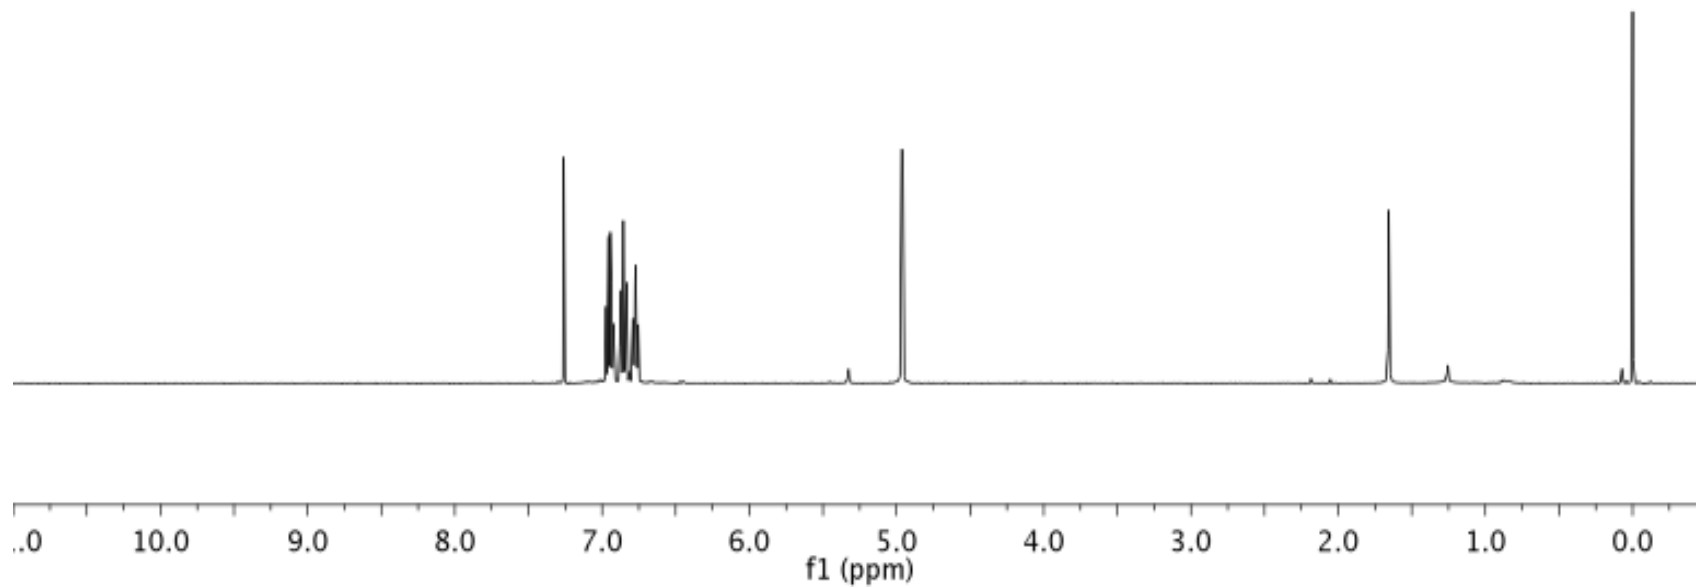

$^1\text{H}$  NMR (500 MHz,  $\text{CDCl}_3$ ) Spectrum of 2,4-Difluorophenol (2e)

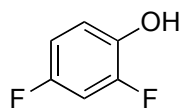

(2e)

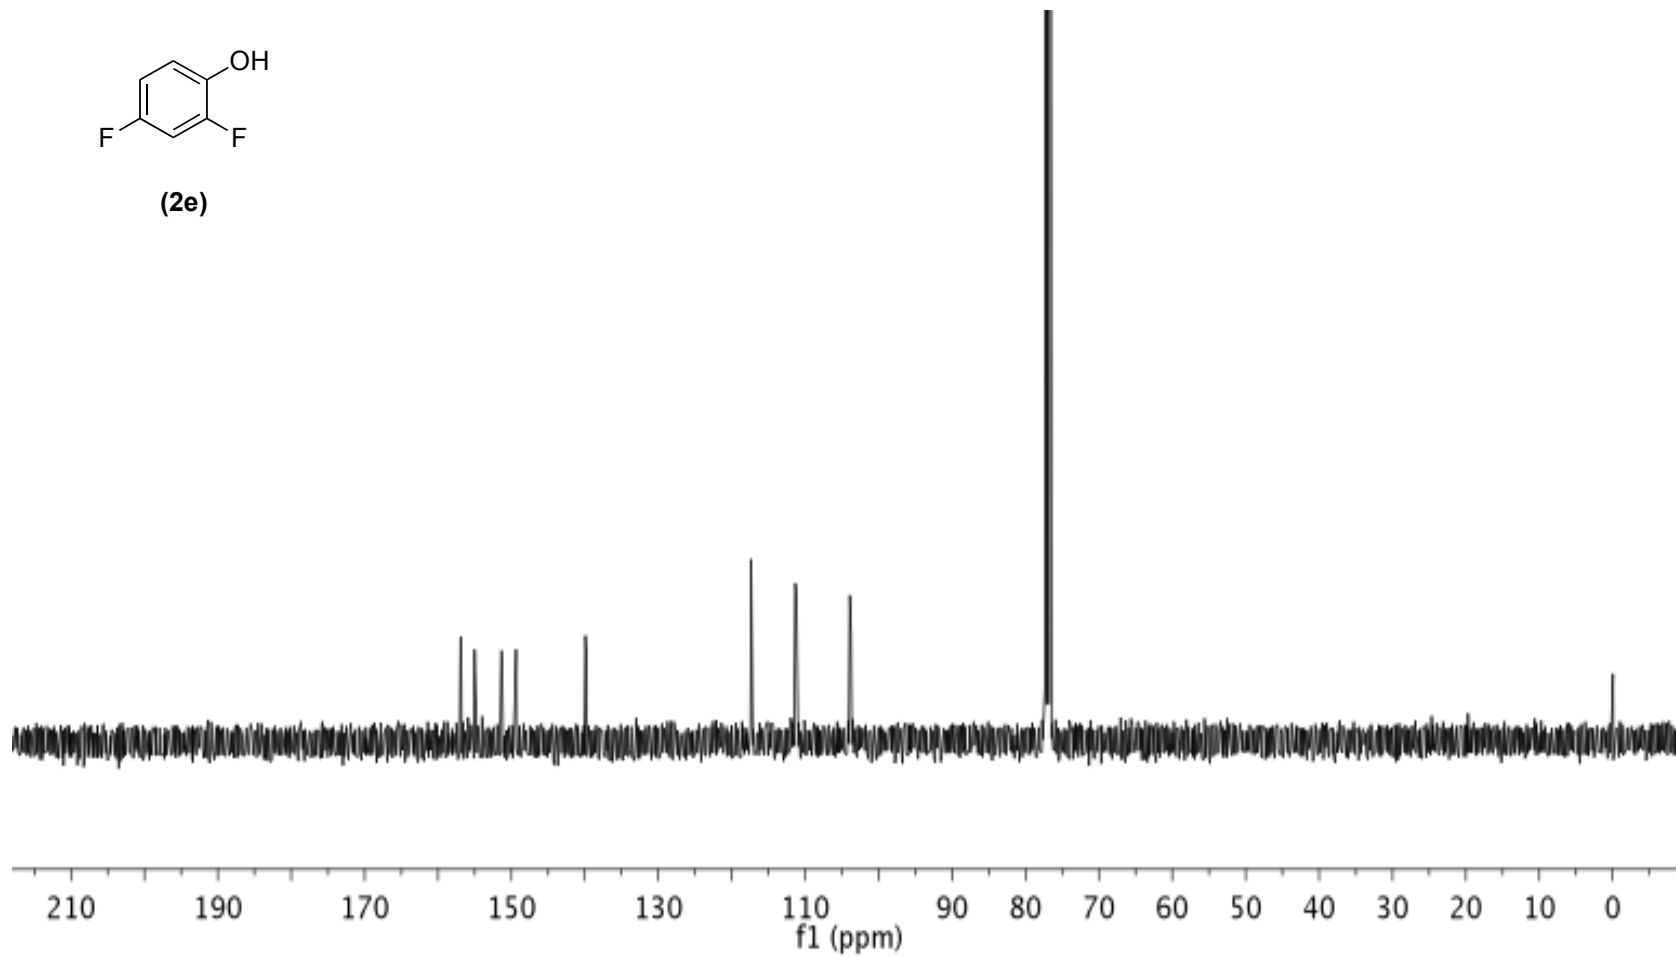

$^{13}\text{C}$  NMR (128.5 MHz,  $\text{CDCl}_3$ ) Spectrum of 2,4-Difluorophenol (2e)

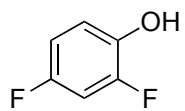

(2e)

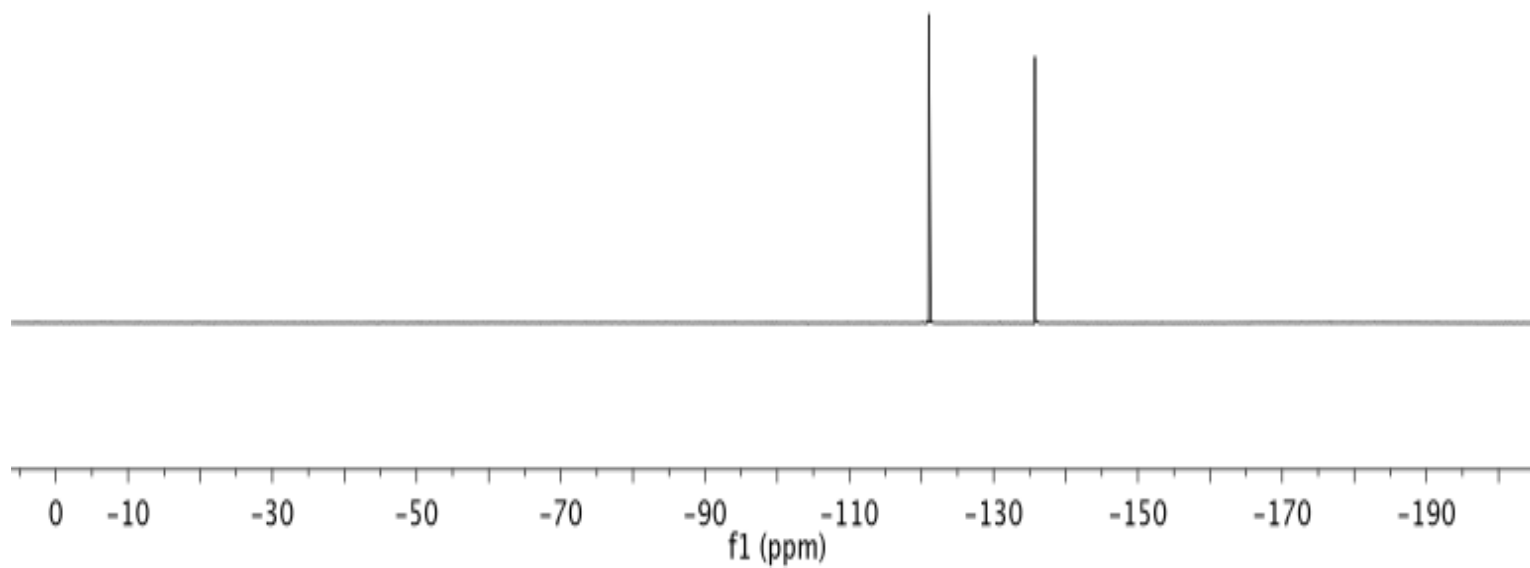

$^{19}\text{F}$  NMR (470.8 MHz,  $\text{CDCl}_3$ ) Spectrum of 2,4-Difluorophenol (2e)

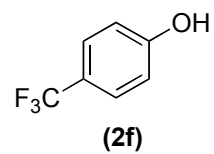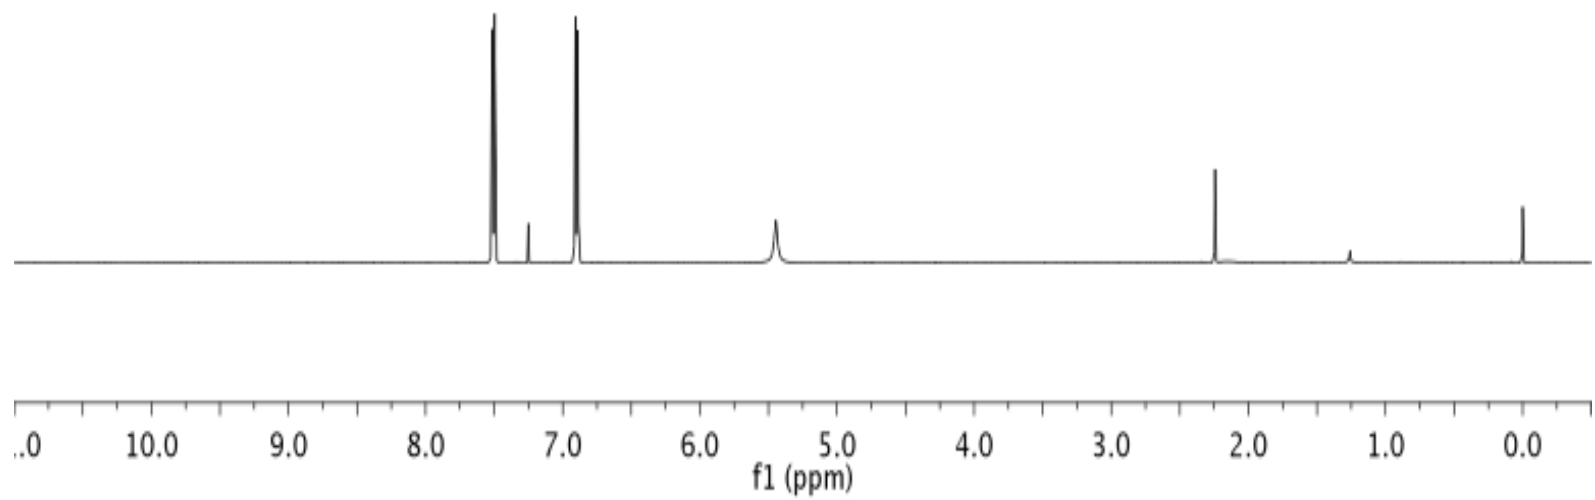

<sup>1</sup>H NMR (500 MHz, CDCl<sub>3</sub>) Spectrum of 4-(Trifluoromethyl)phenol (2f)

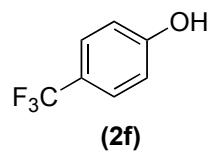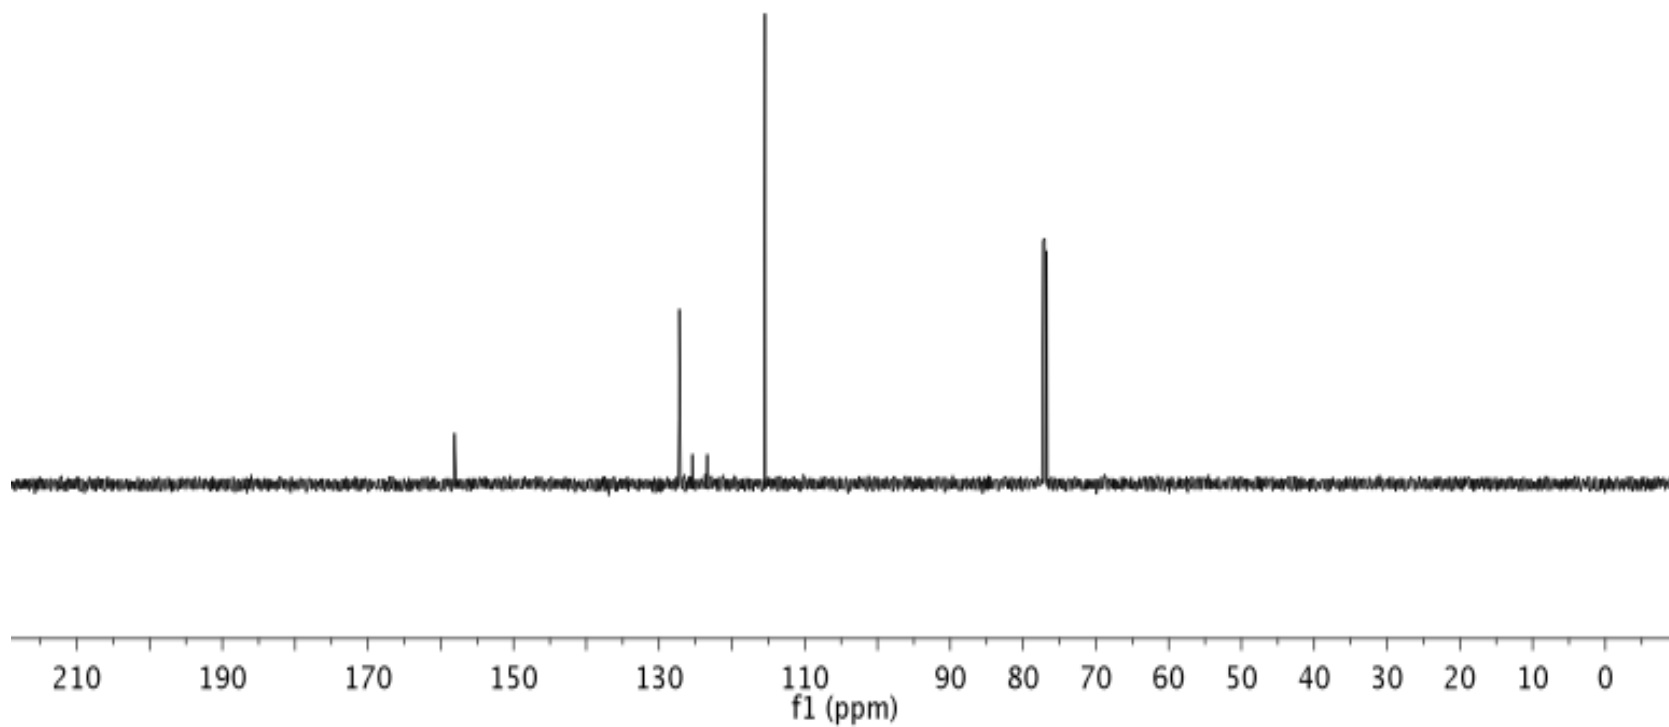

<sup>13</sup>C NMR (128.5 MHz, CDCl<sub>3</sub>) Spectrum of 4-(Trifluoromethyl)phenol (2f)

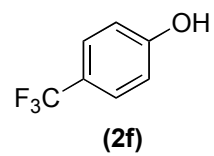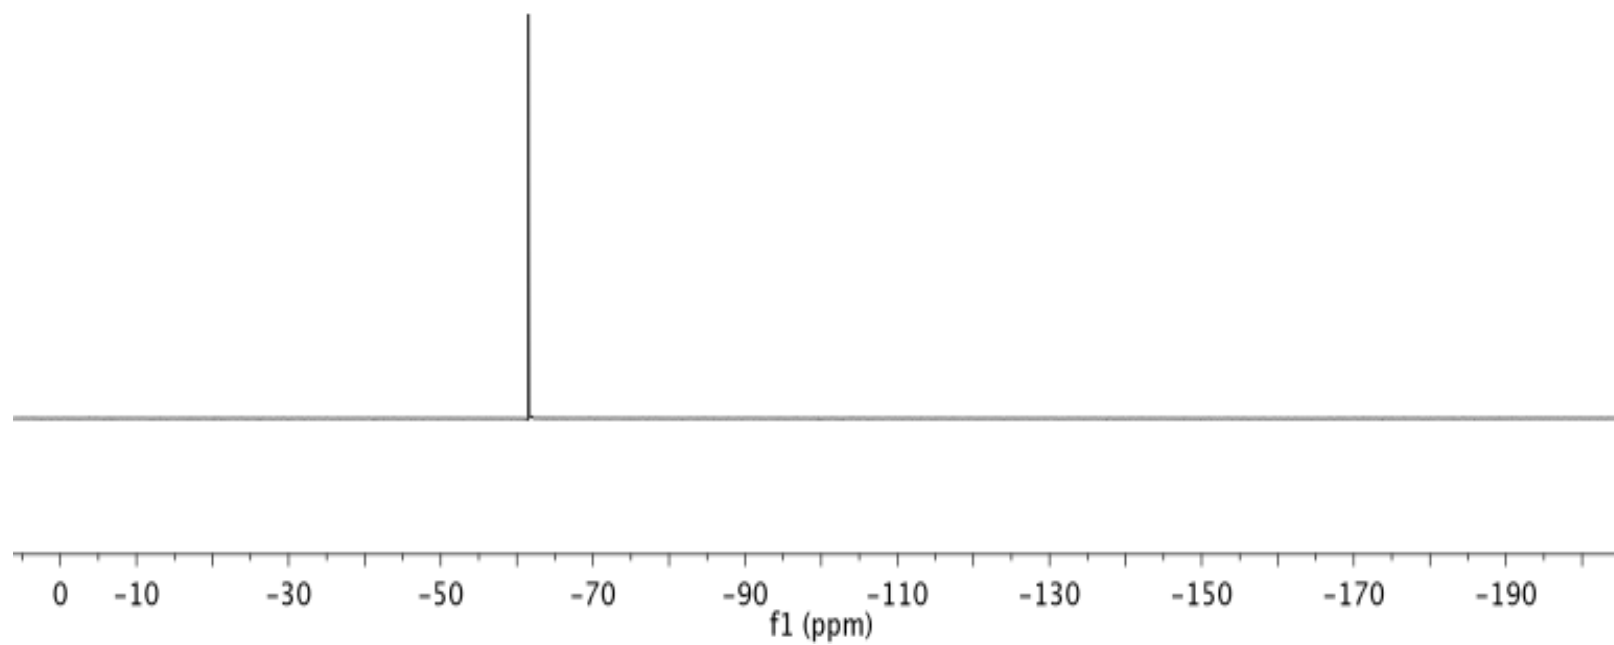

$^{19}\text{F}$  NMR (470.8 MHz,  $\text{CDCl}_3$ ) Spectrum of 4-(Trifluoromethyl)phenol (2f)

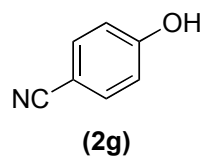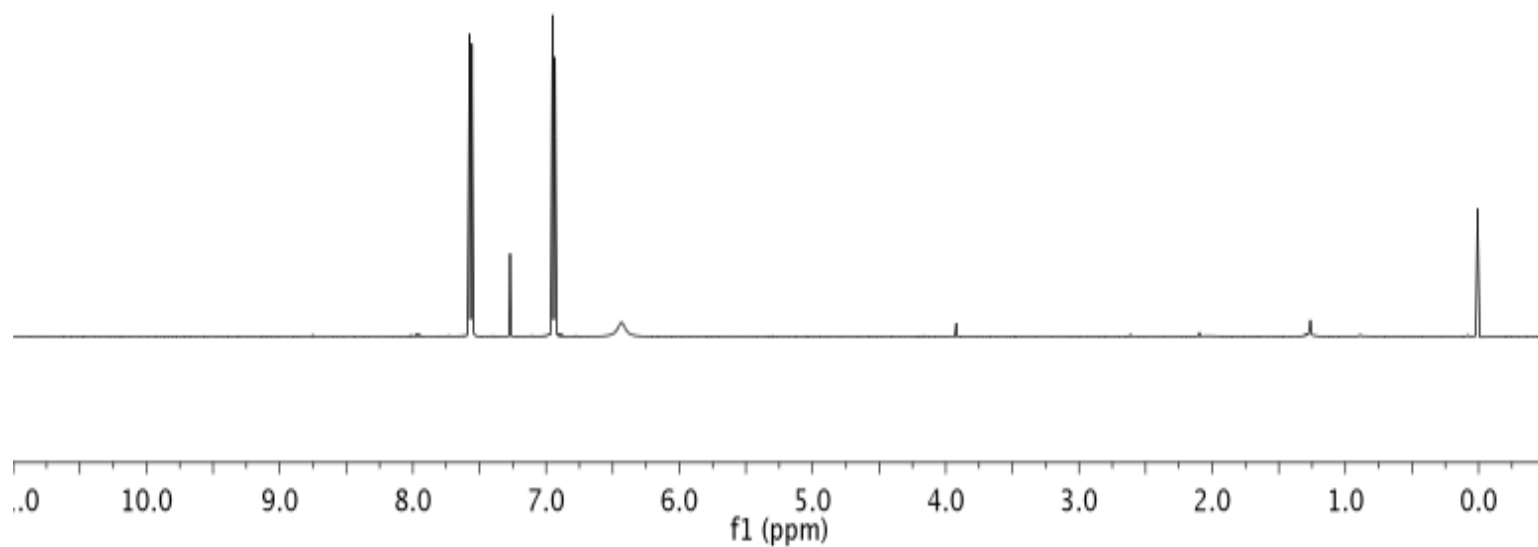

<sup>1</sup>H NMR (500 MHz, CDCl<sub>3</sub>) Spectrum of 4-Hydroxybenzonitrile (2g)



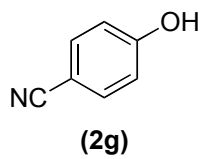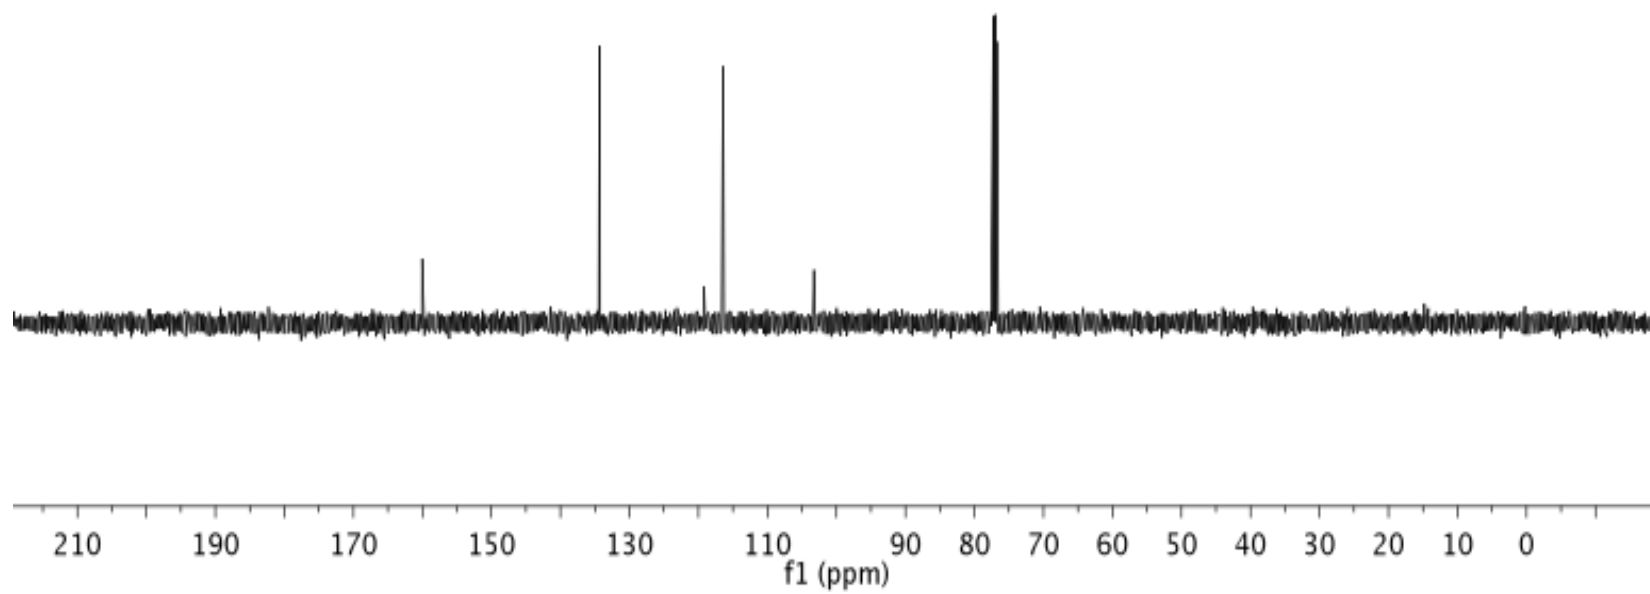

$^{13}\text{C}$  NMR (128.5 MHz,  $\text{CDCl}_3$ ) Spectrum of 4-Hydroxybenzointrile (2g)

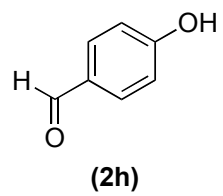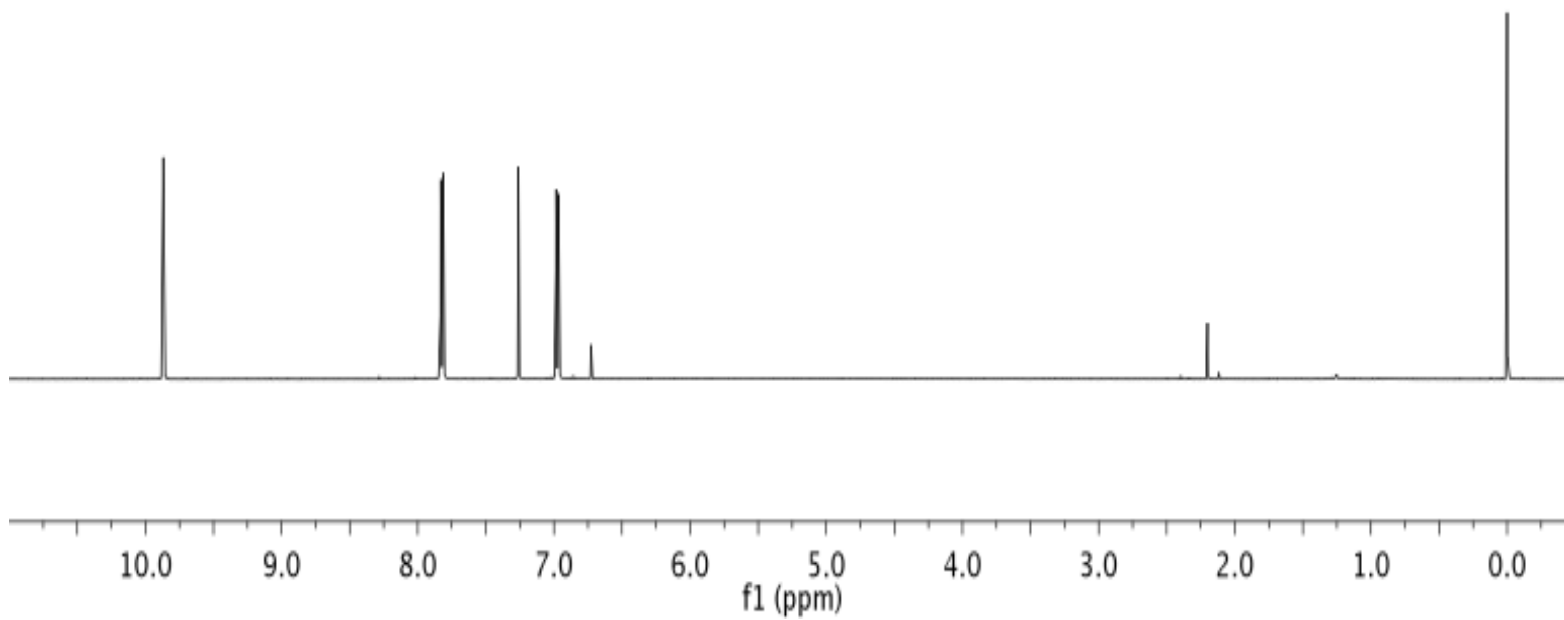

<sup>1</sup>H NMR (500 MHz, CDCl<sub>3</sub>) Spectrum of 4-Hydroxybenzaldehyde (2h)

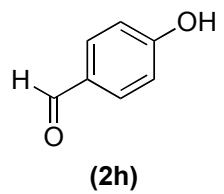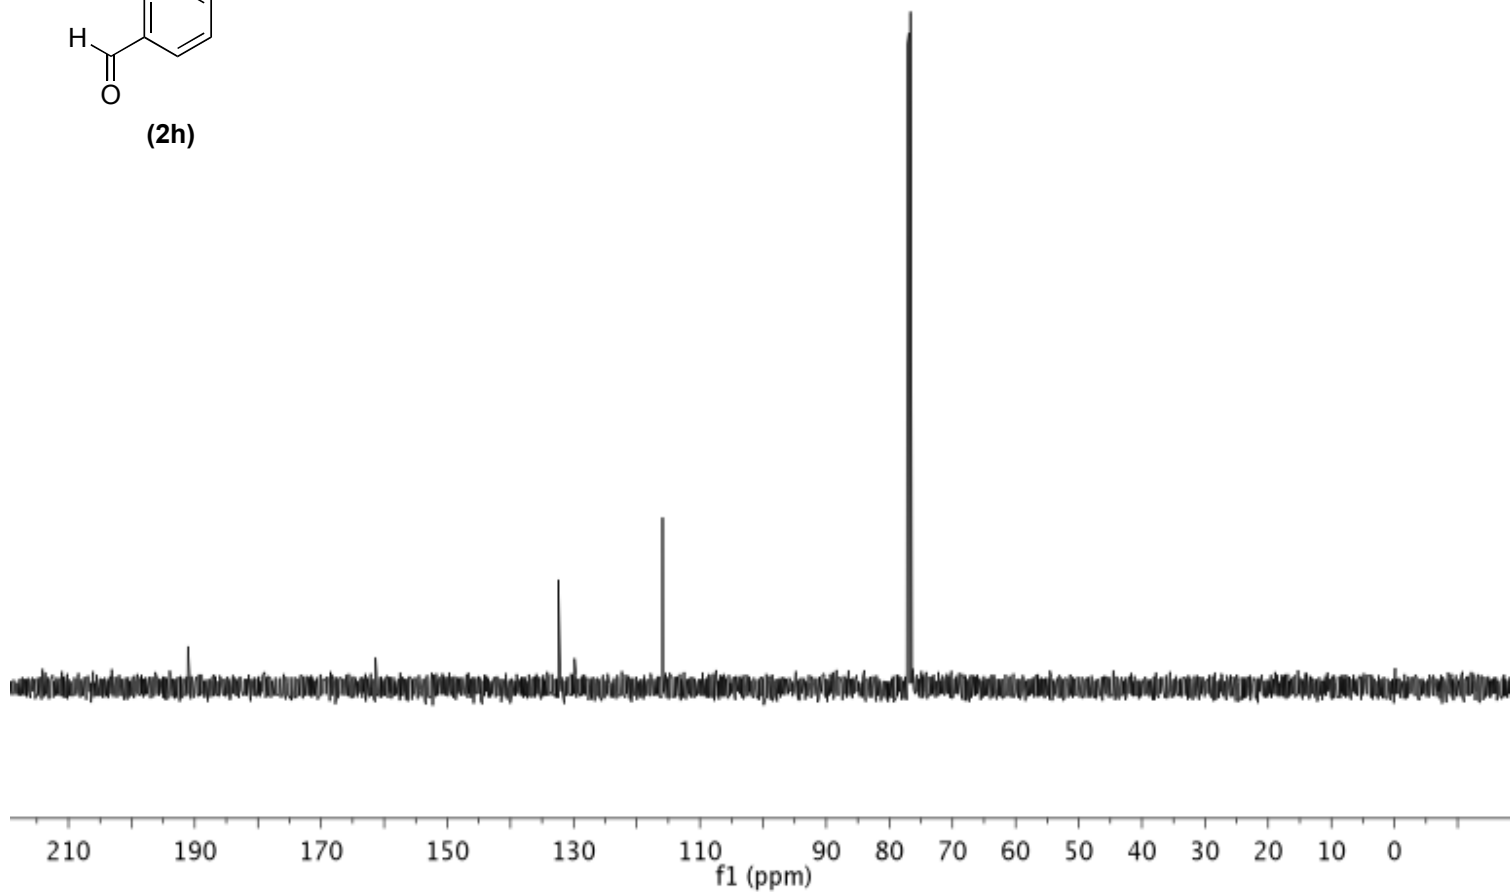

$^{13}\text{C}$  NMR (128.5 MHz,  $\text{CDCl}_3$ ) Spectrum of 4-Hydroxybenzaldehyde (2h)

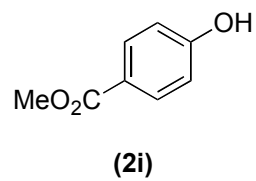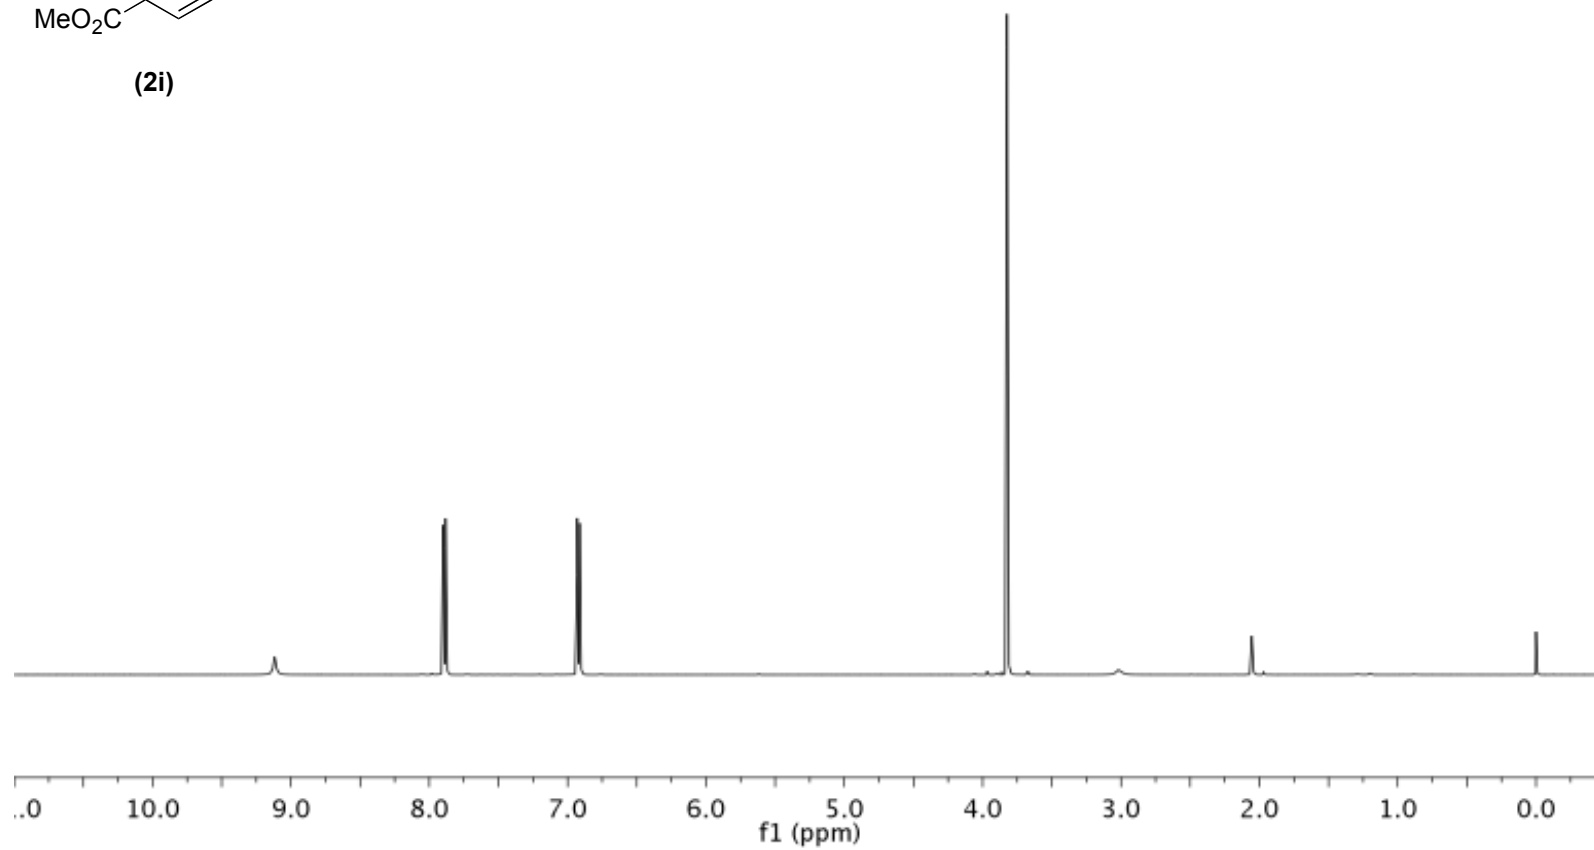

<sup>1</sup>H NMR (500 MHz, acetone-*d*<sub>6</sub>) Spectrum of Methyl 4-Hydroxybenzoate (2i)

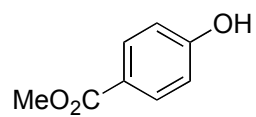

(2i)

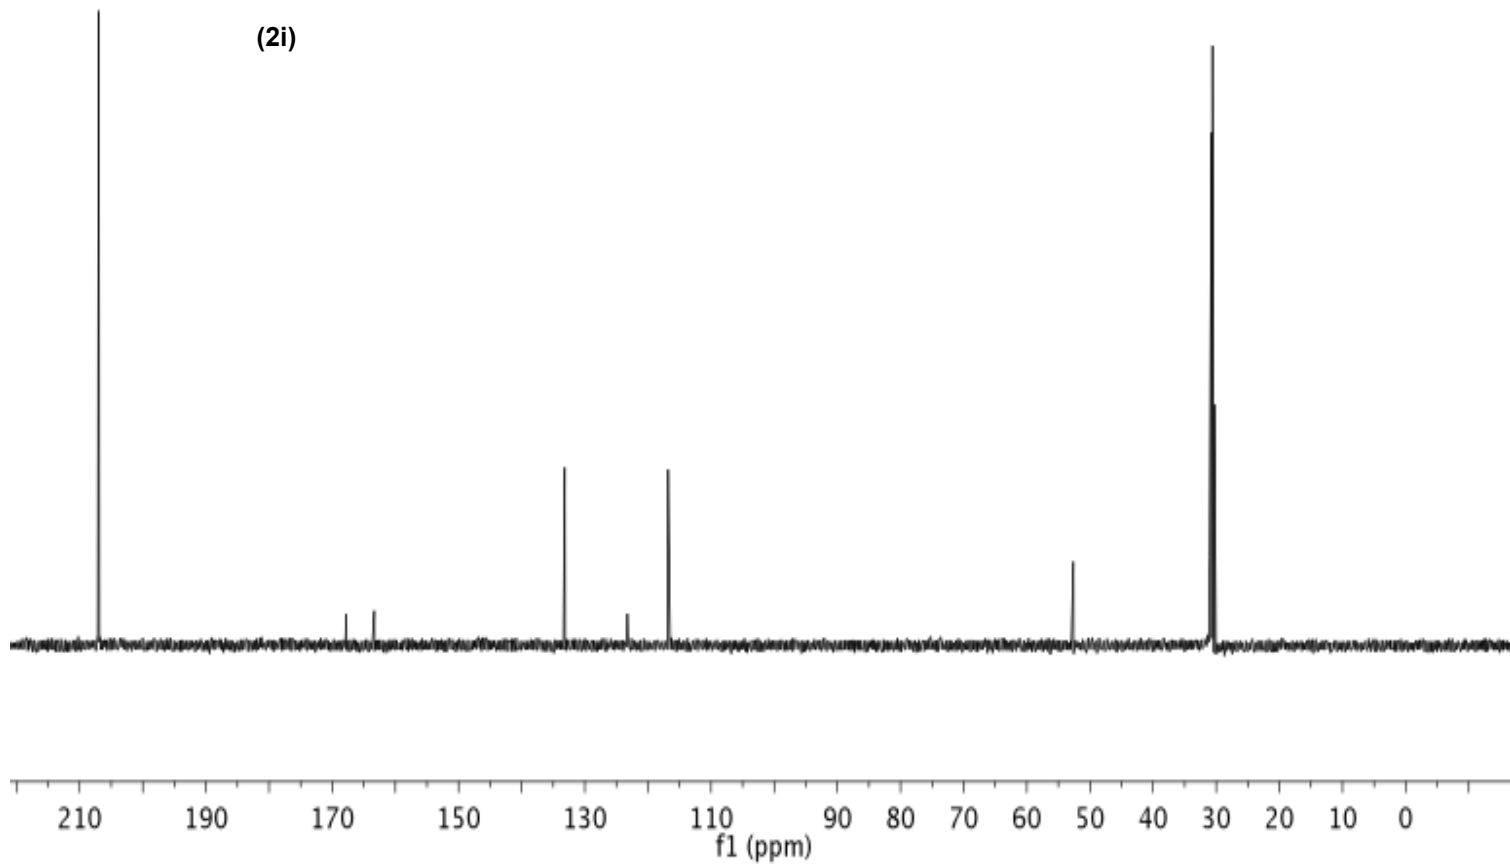

$^{13}\text{C}$  NMR (128.5 MHz, acetone- $d_6$ ) Spectrum of Methyl 4-Hydroxybenzoate (2i)

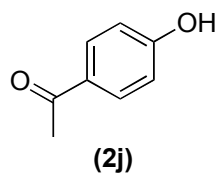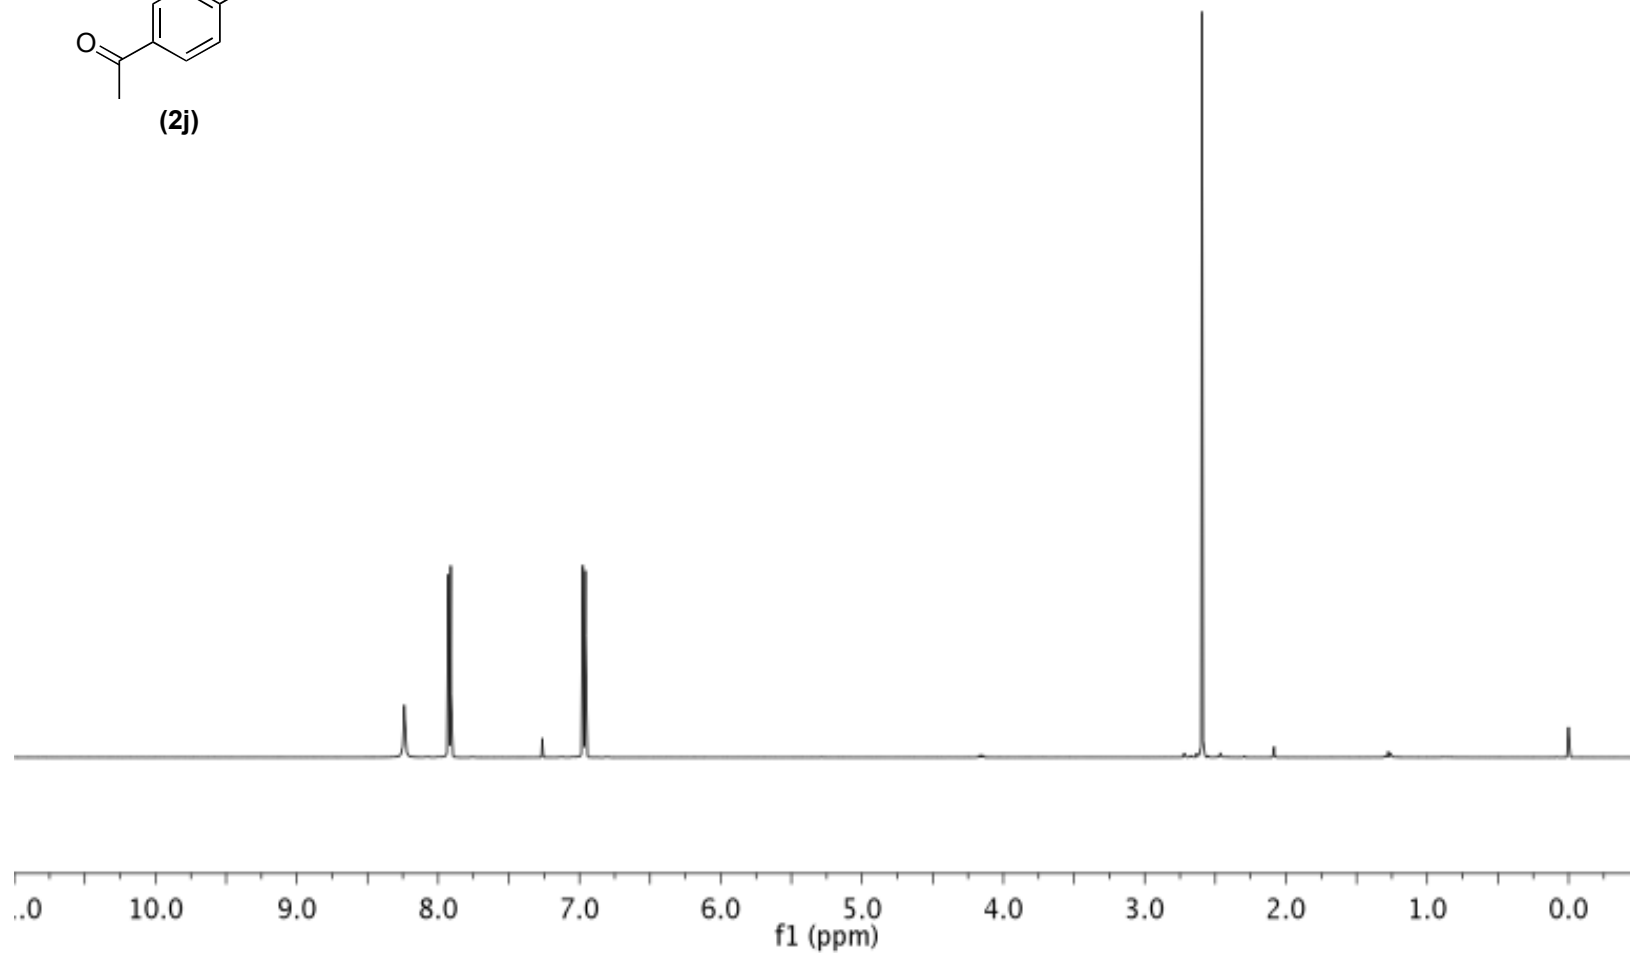

<sup>1</sup>H NMR (500 MHz, CDCl<sub>3</sub>) Spectrum of 1-(4-Hydroxyphenyl)ethanone (2j)

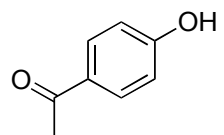

(2j)

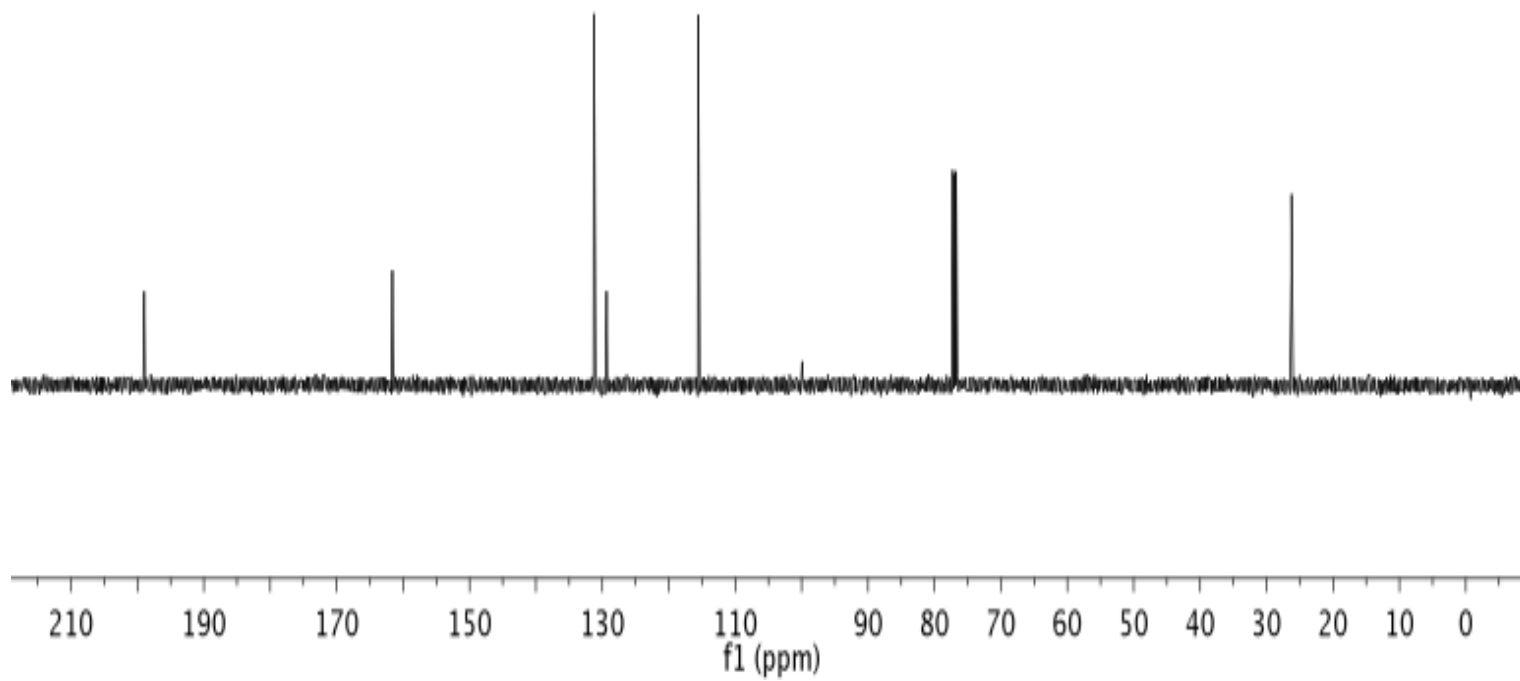

$^{13}\text{C}$  NMR (128.5 MHz,  $\text{CDCl}_3$ ) Spectrum of 1-(4-Hydroxyphenyl)ethanone (2j)

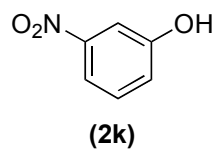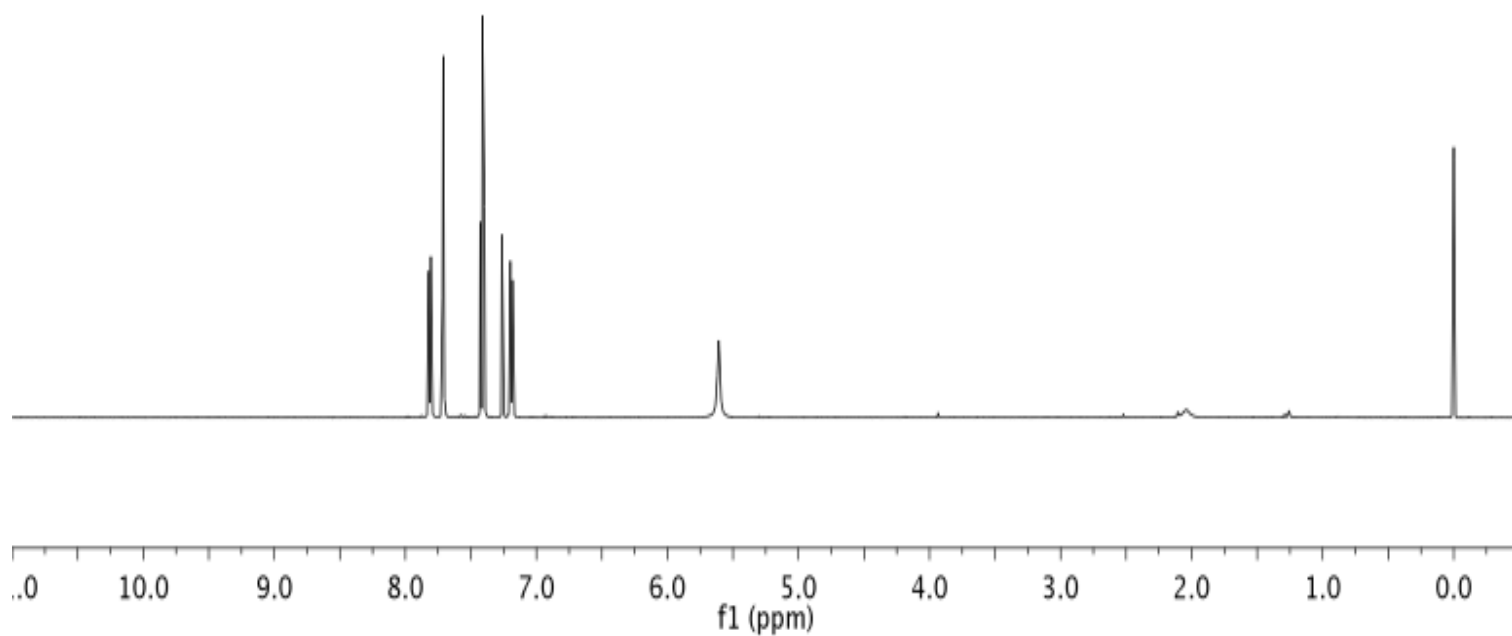

$^1\text{H}$  NMR (500 MHz,  $\text{CDCl}_3$ ) Spectrum of 3-Nitrophenol (2k)



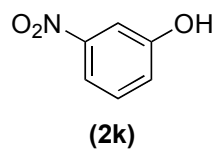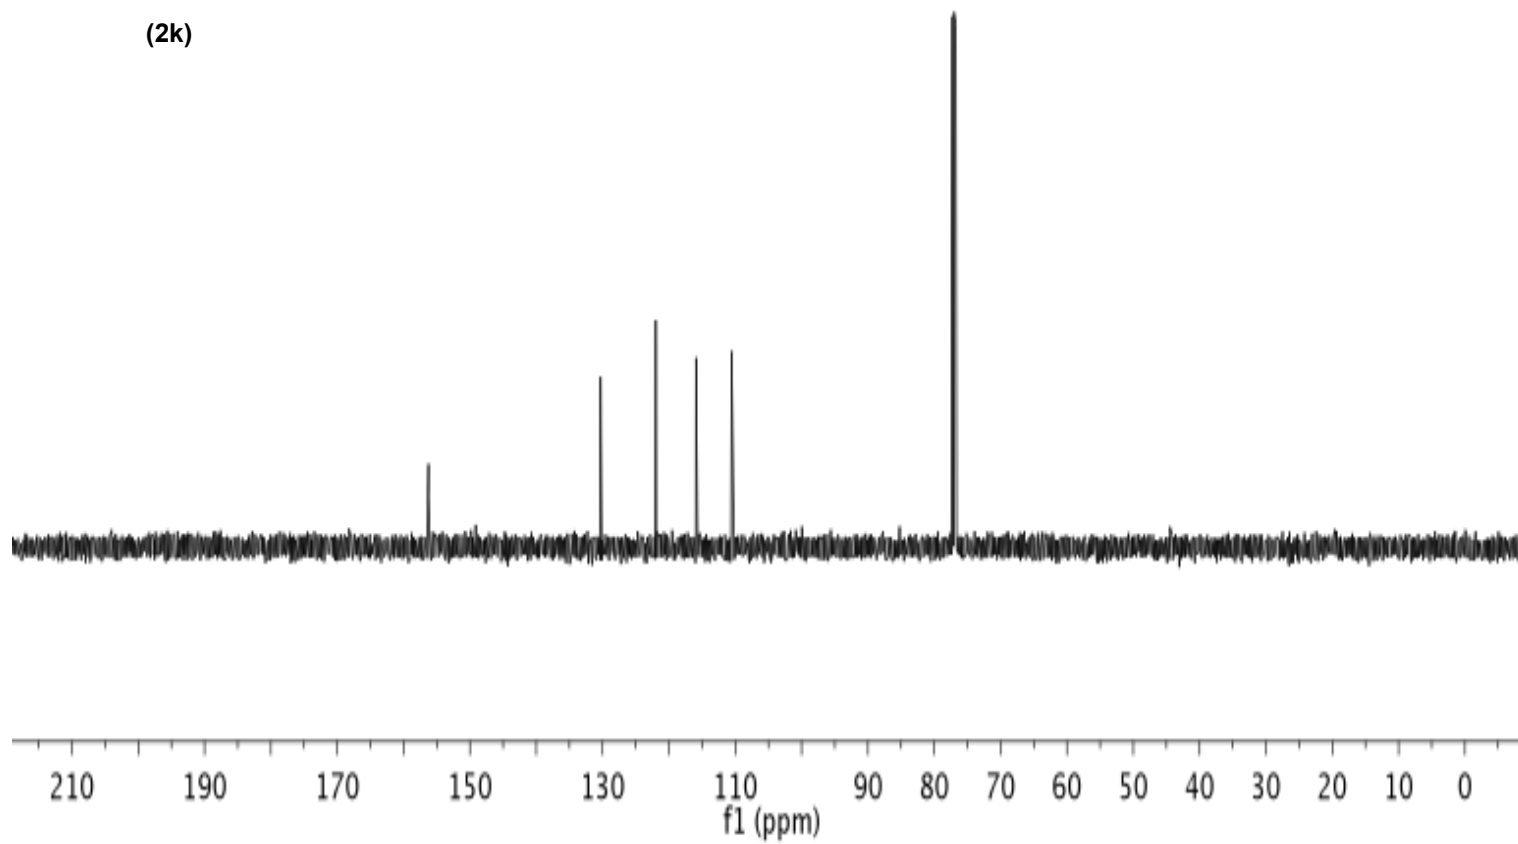

$^{13}\text{C}$  NMR (128.5 MHz,  $\text{CDCl}_3$ ) Spectrum of 3-Nitrophenol (2k)

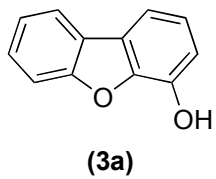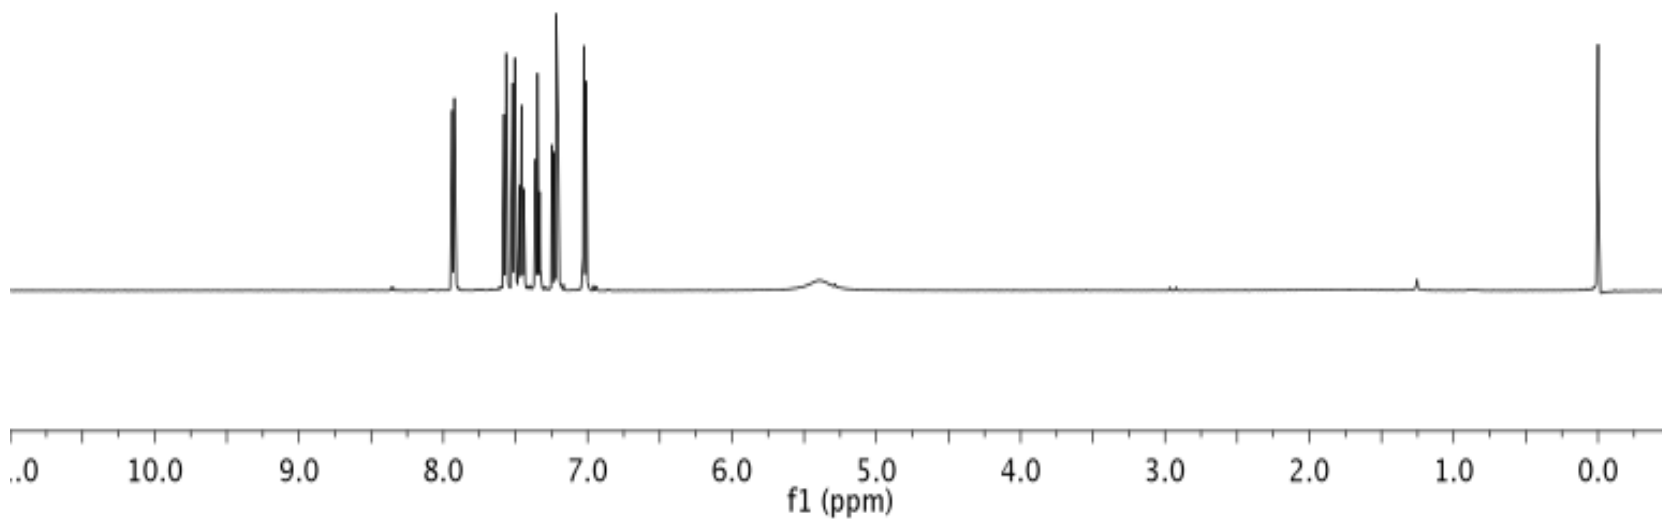

<sup>1</sup>H NMR (500 MHz, CDCl<sub>3</sub>) Spectrum of Dibenzob[b,d]furan-4-ol (3a)

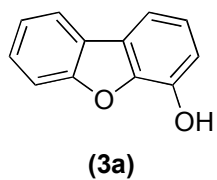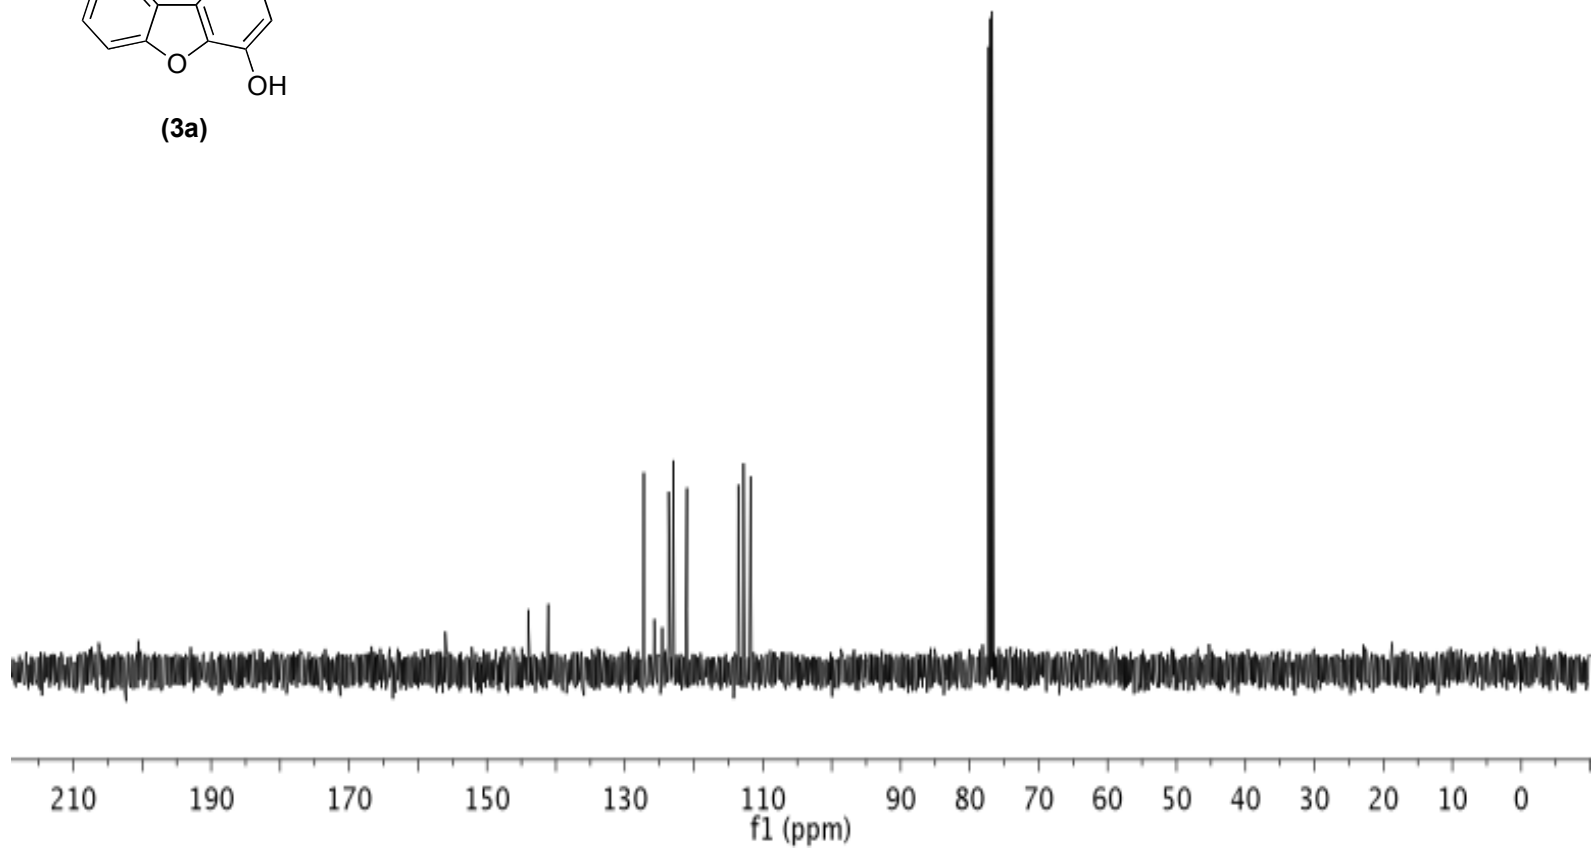

$^{13}\text{C}$  NMR (128.5 MHz,  $\text{CDCl}_3$ ) Spectrum of Dibenzo[*b,d*]furan-4-ol (3a)

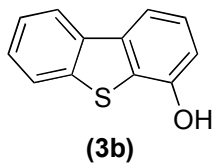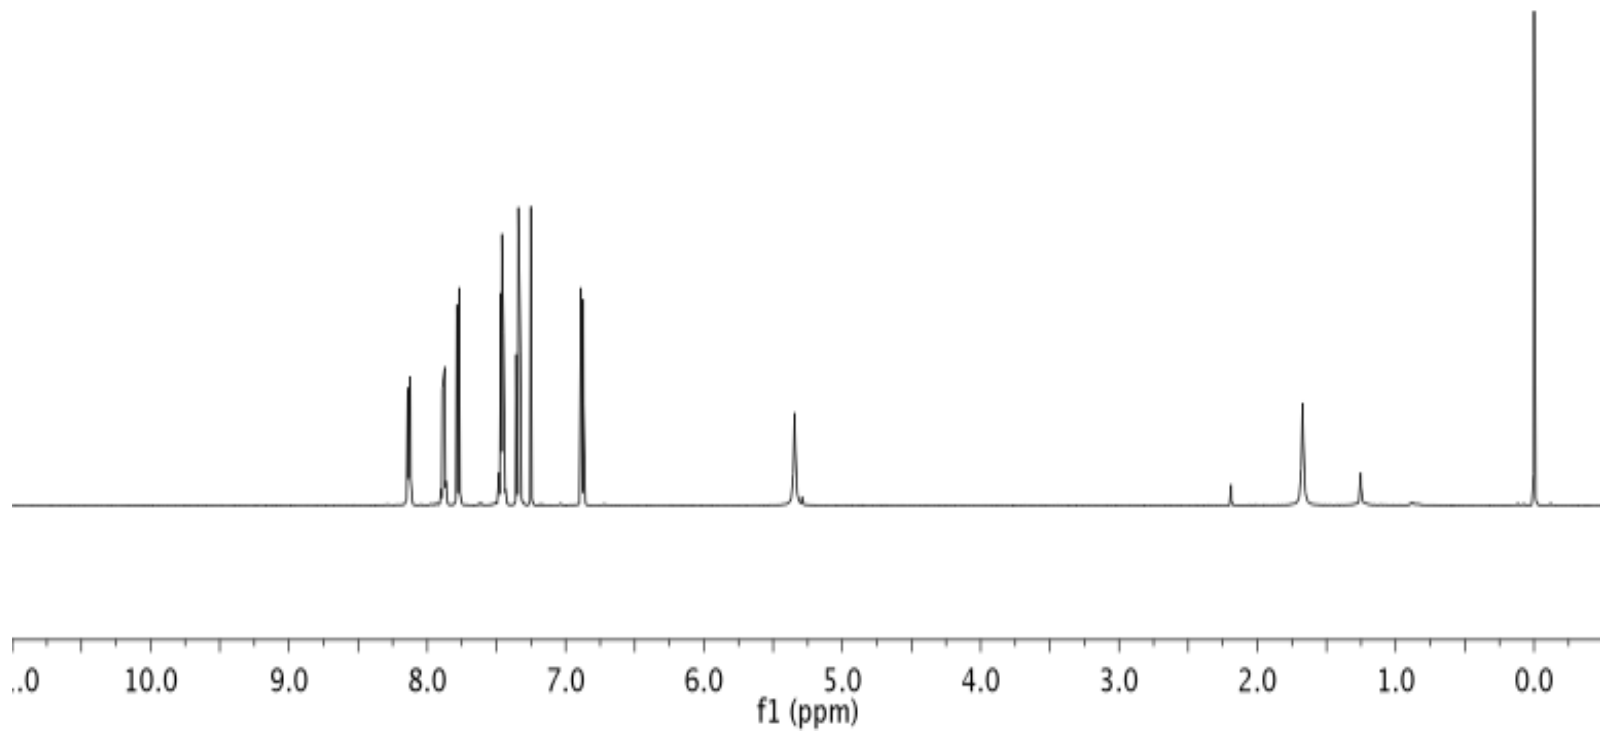

<sup>1</sup>H NMR (500 MHz, CDCl<sub>3</sub>) Spectrum of Dibenzo[*b,d*]thiophen-4-ol (3b)

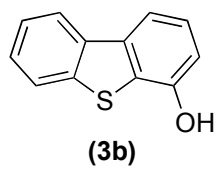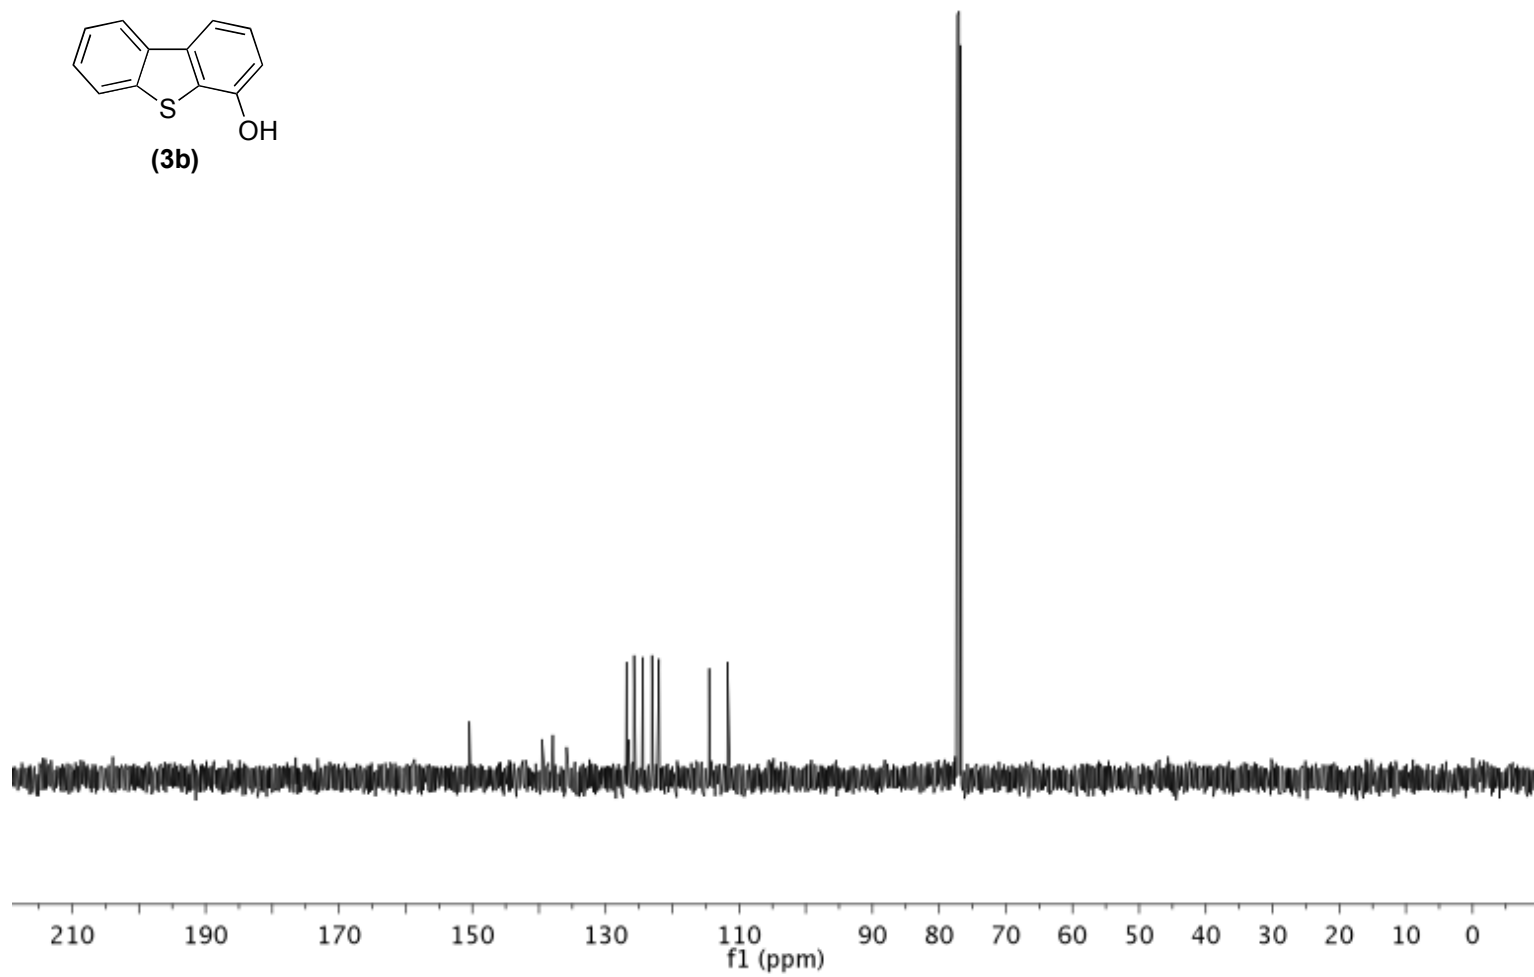

<sup>13</sup>C NMR (128.5 MHz, CDCl<sub>3</sub>) Spectrum of Dibenzo[*b,d*]thiophen-4-ol (3b)

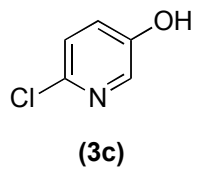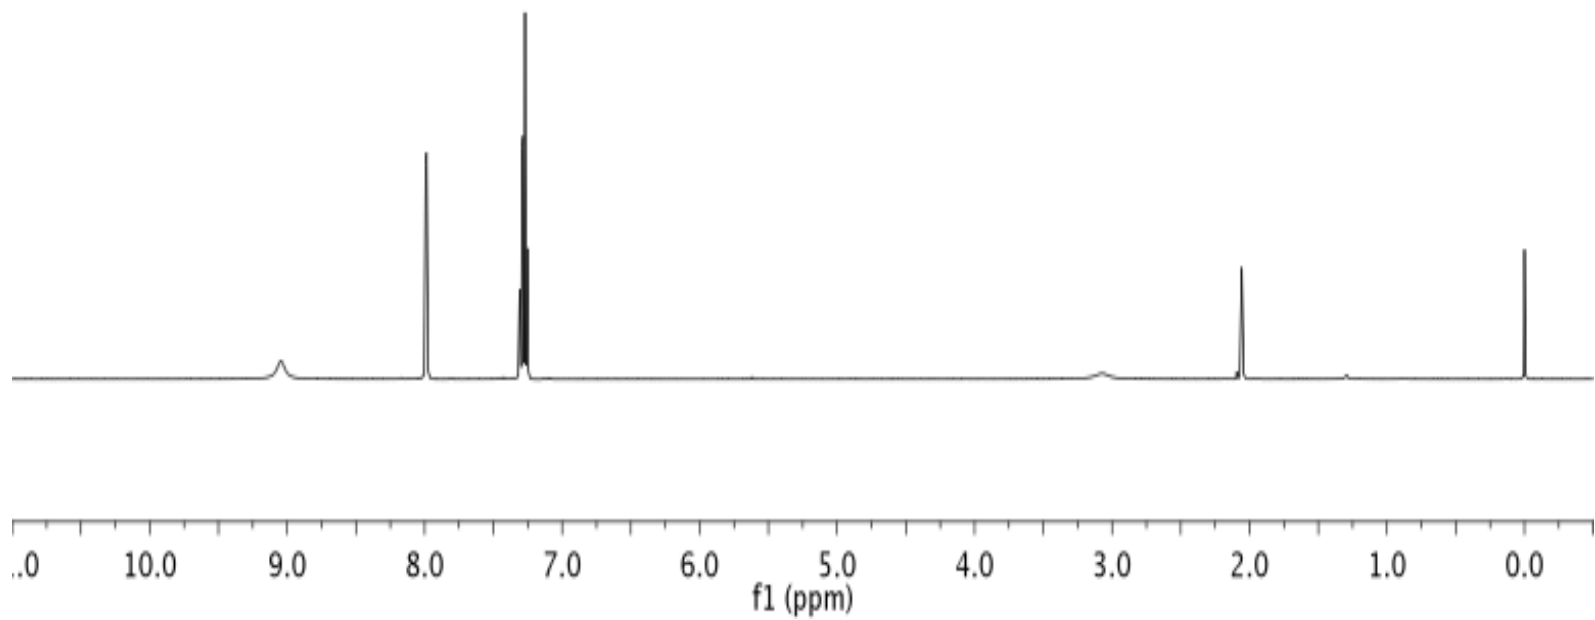

<sup>1</sup>H NMR (500 MHz, acetone-*d*<sub>6</sub>) Spectrum of 6-Chloropyridin-3-ol (3c)

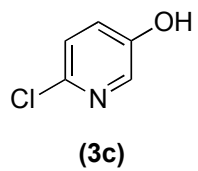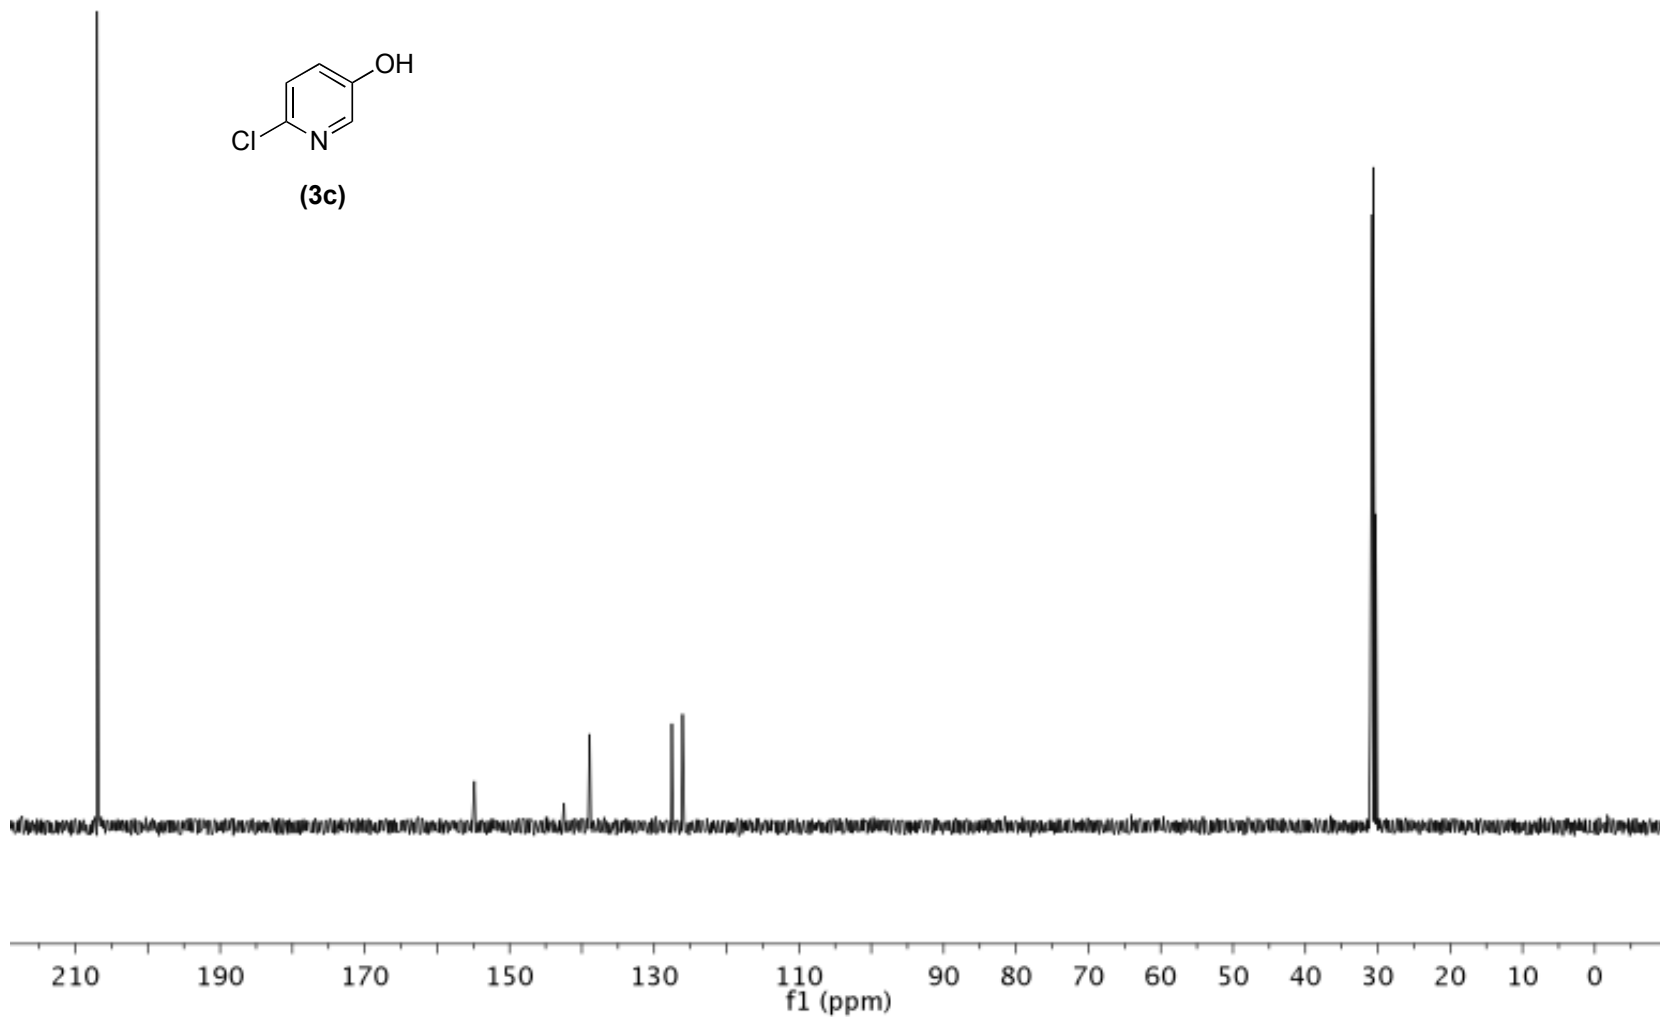

$^{13}\text{C}$  NMR (128.5 MHz, acetone- $d_6$ ) Spectrum of 6-Chloropyridin-3-ol (3c)

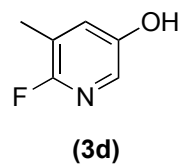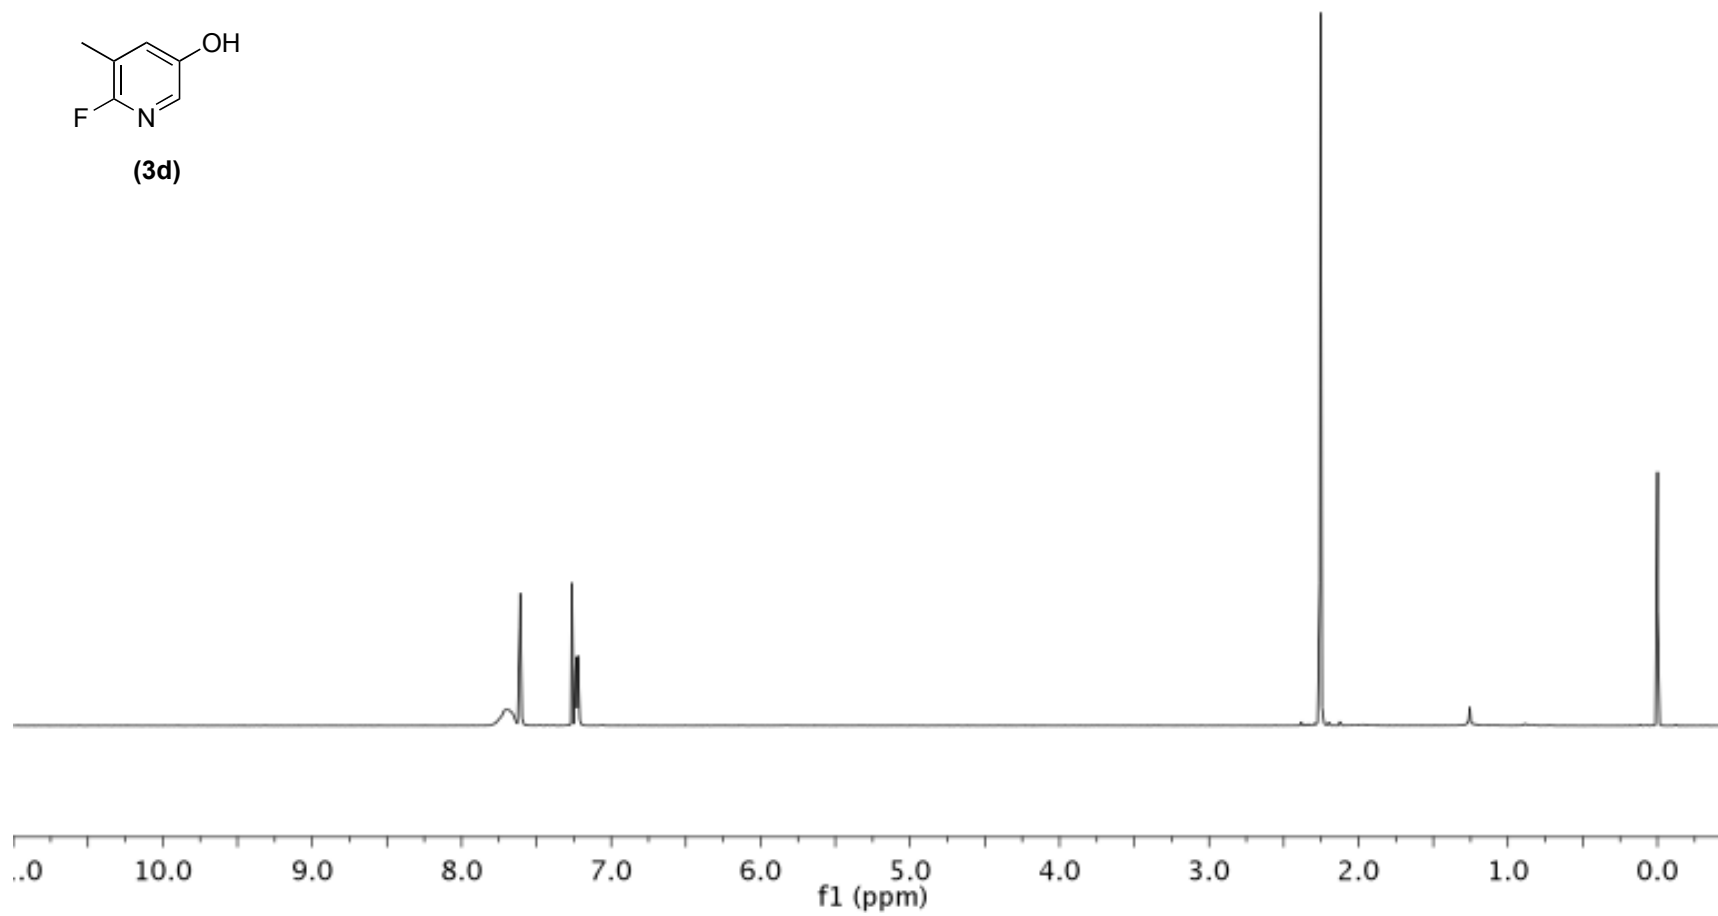

<sup>1</sup>H NMR (500 MHz, CDCl<sub>3</sub>) Spectrum of 6-Fluoro-5-methylpyridin-3-ol (3d)



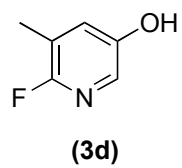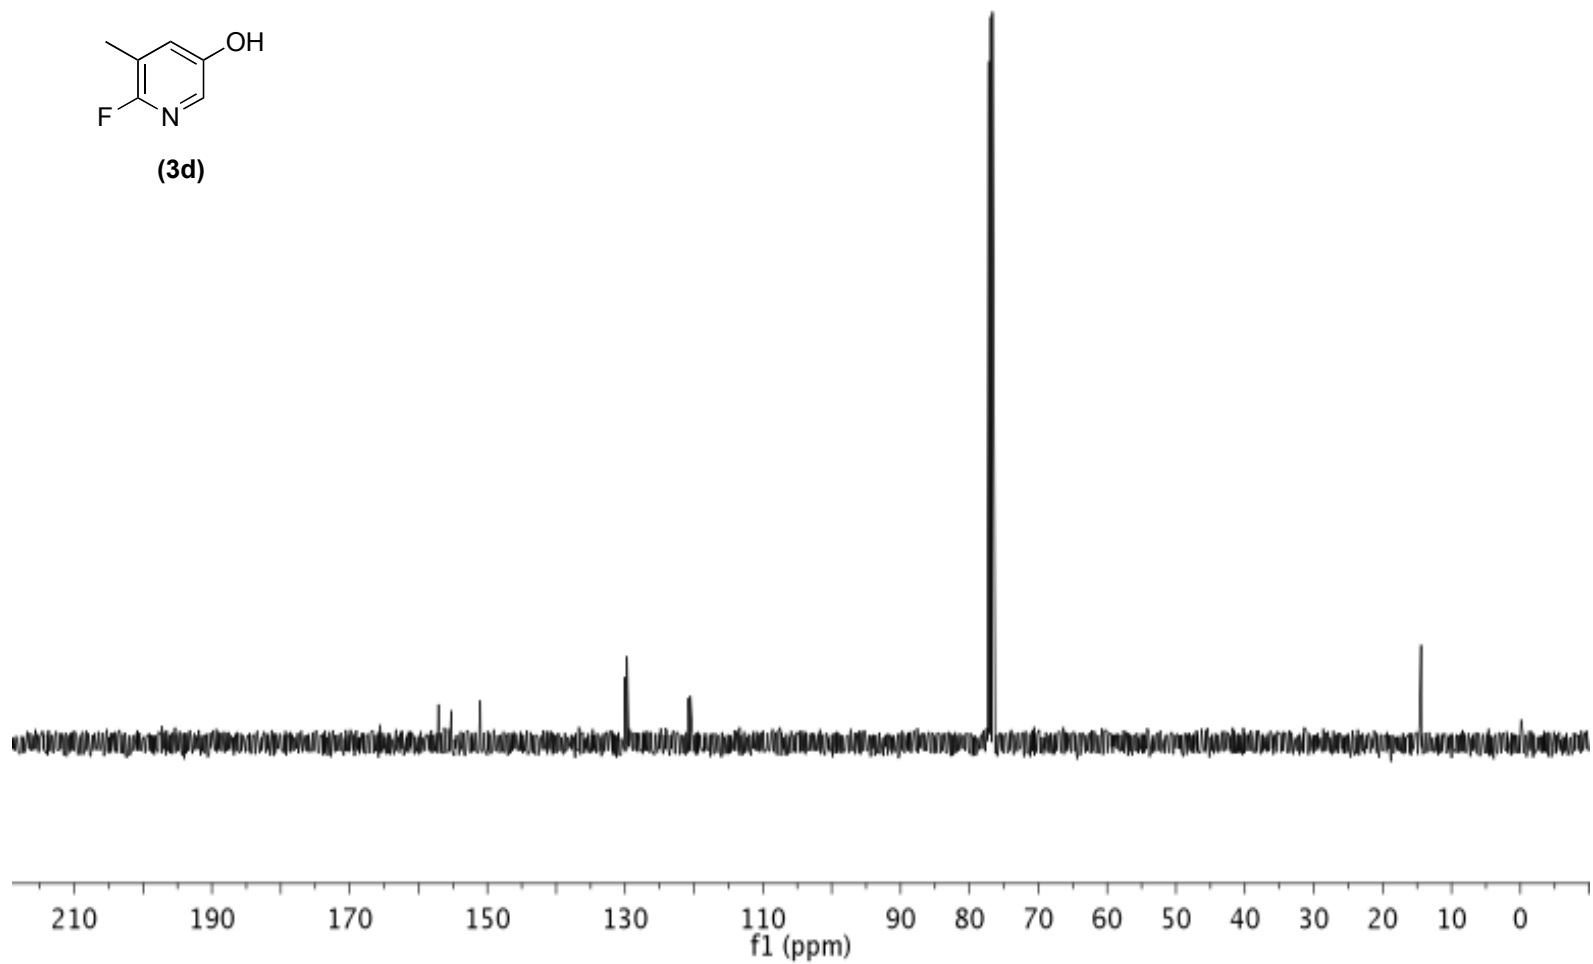

$^{13}\text{C}$  NMR (128.5 MHz,  $\text{CDCl}_3$ ) Spectrum of 6-Fluoro-5-methylpyridin-3-ol (3d)

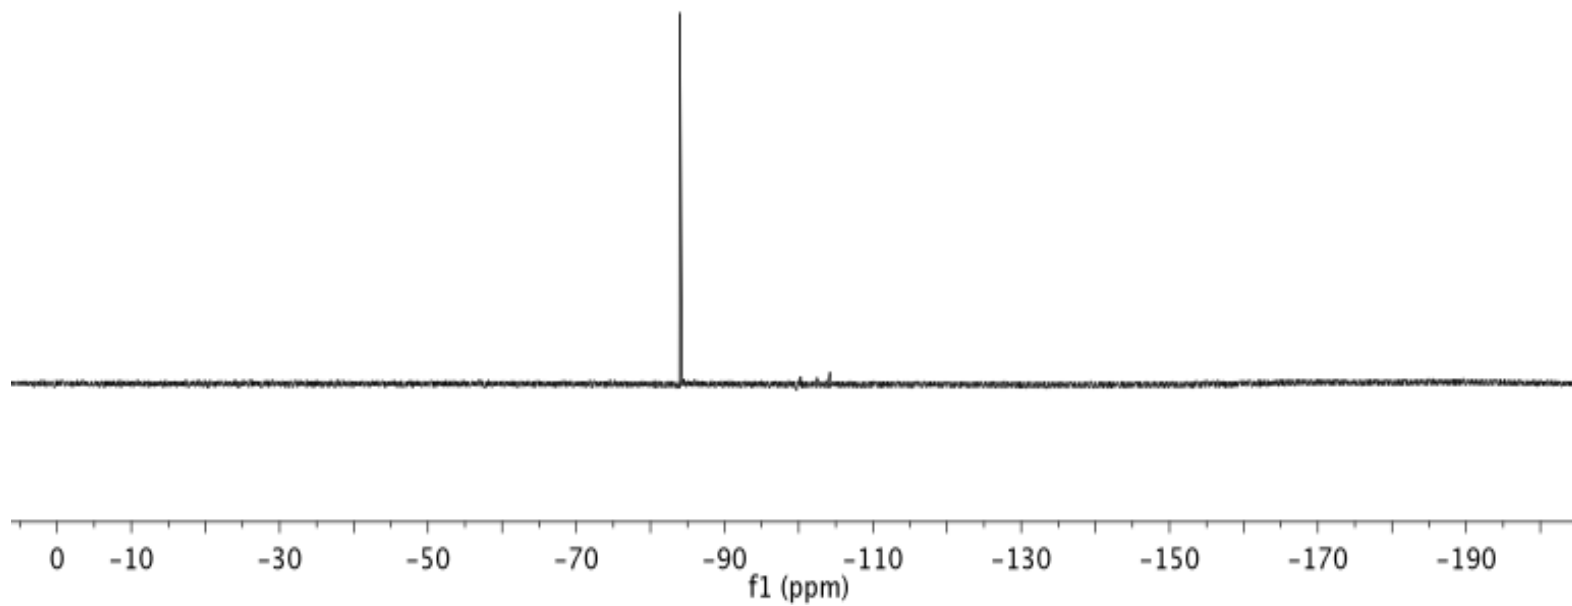

$^{19}\text{F}$  NMR (470.8 MHz,  $\text{CDCl}_3$ ) Spectrum of 6-Fluoro-5-methylpyridin-3-ol (3d)

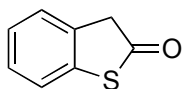

**(3e)**

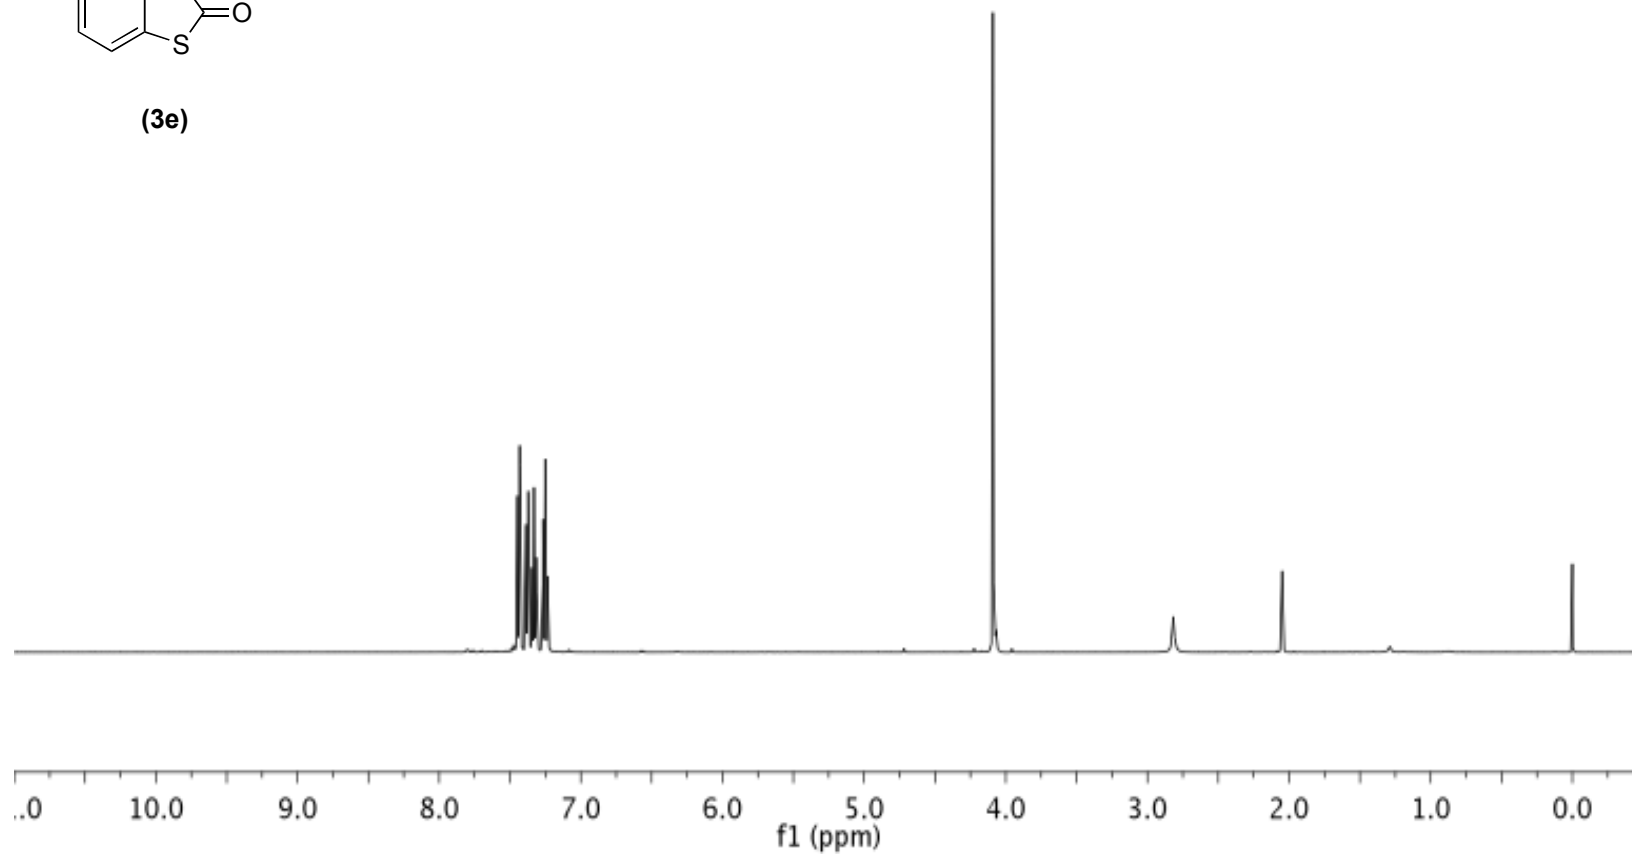

$^1\text{H}$  NMR (500 MHz, acetone- $d_6$ ) Spectrum of Benzo[*b*]thiophen-2(3*H*)-one (3e)

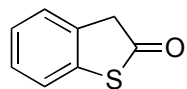

(3e)

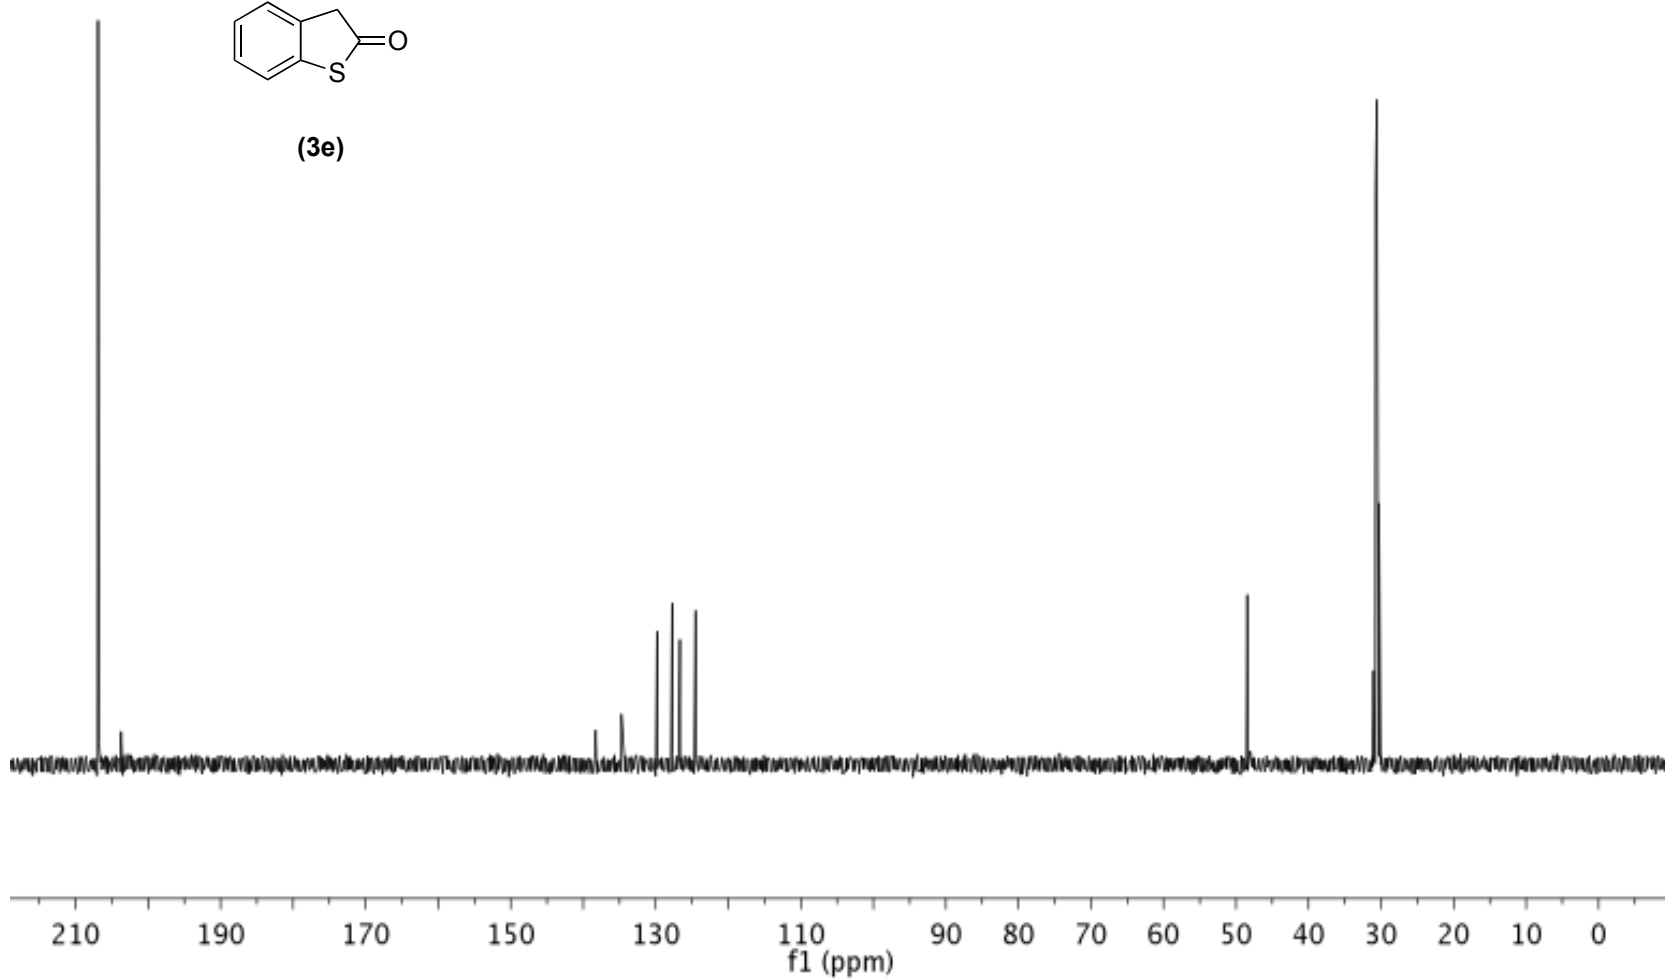

<sup>13</sup>C NMR (128.5 MHz, acetone-*d*<sub>6</sub>) Spectrum of Benzo[*b*]thiophen-2(3*H*)-one (3e)

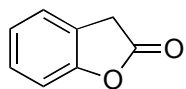

(3f)

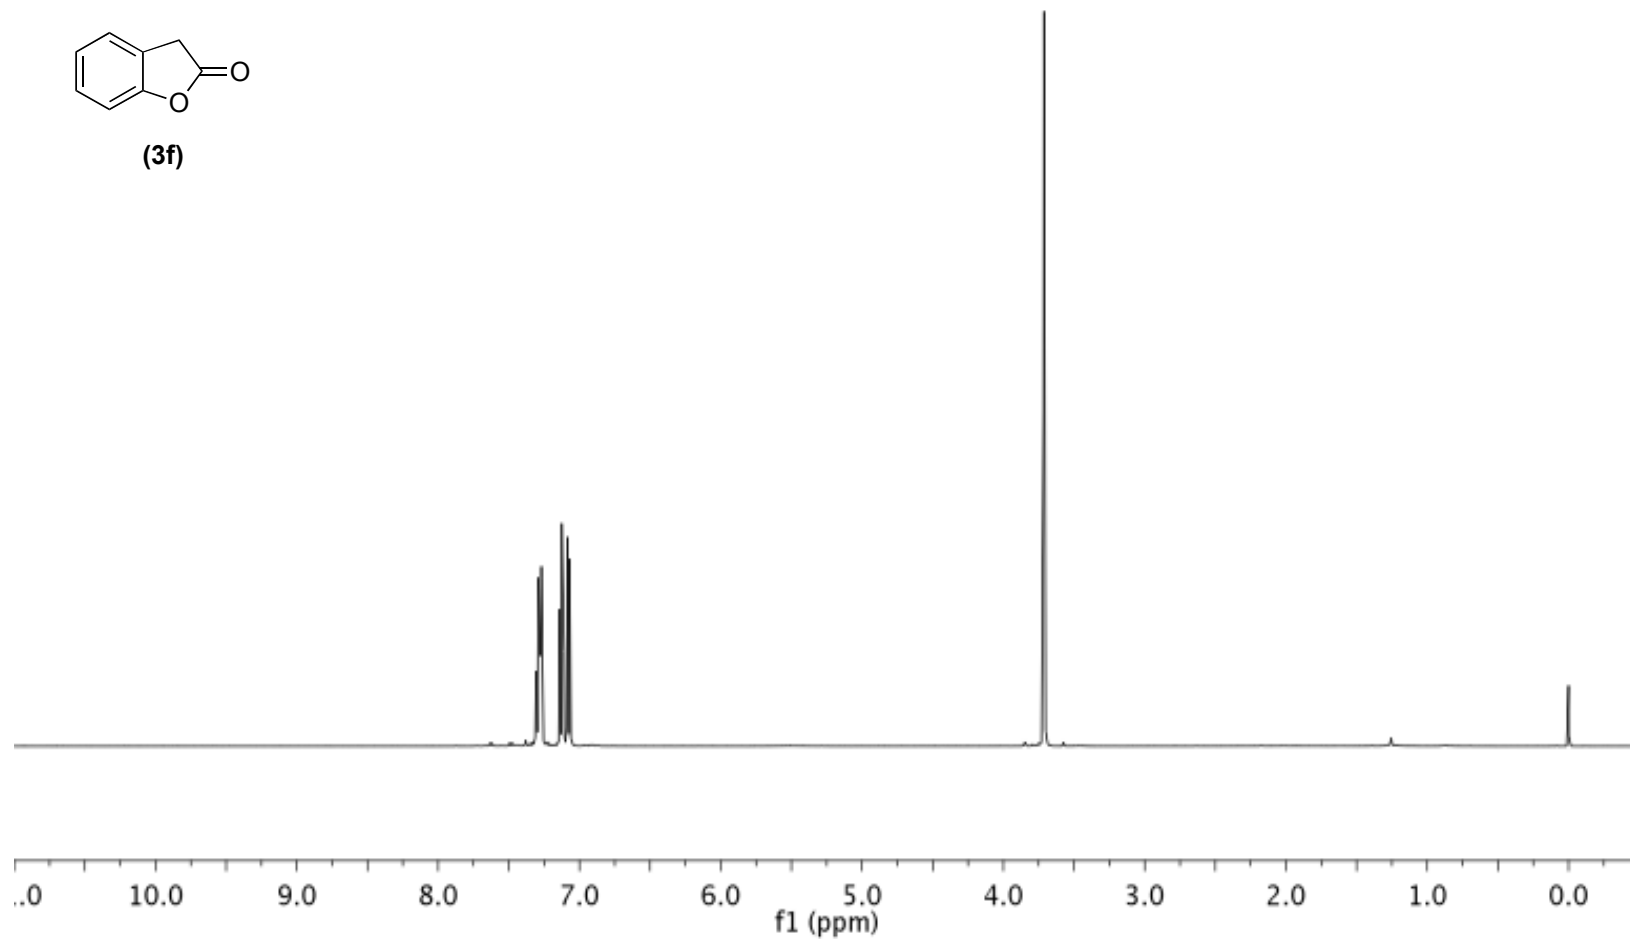

<sup>1</sup>H NMR (500 MHz, CDCl<sub>3</sub>) Spectrum of Benzofuran-2(3H)-one (3f)

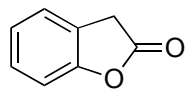

(3f)

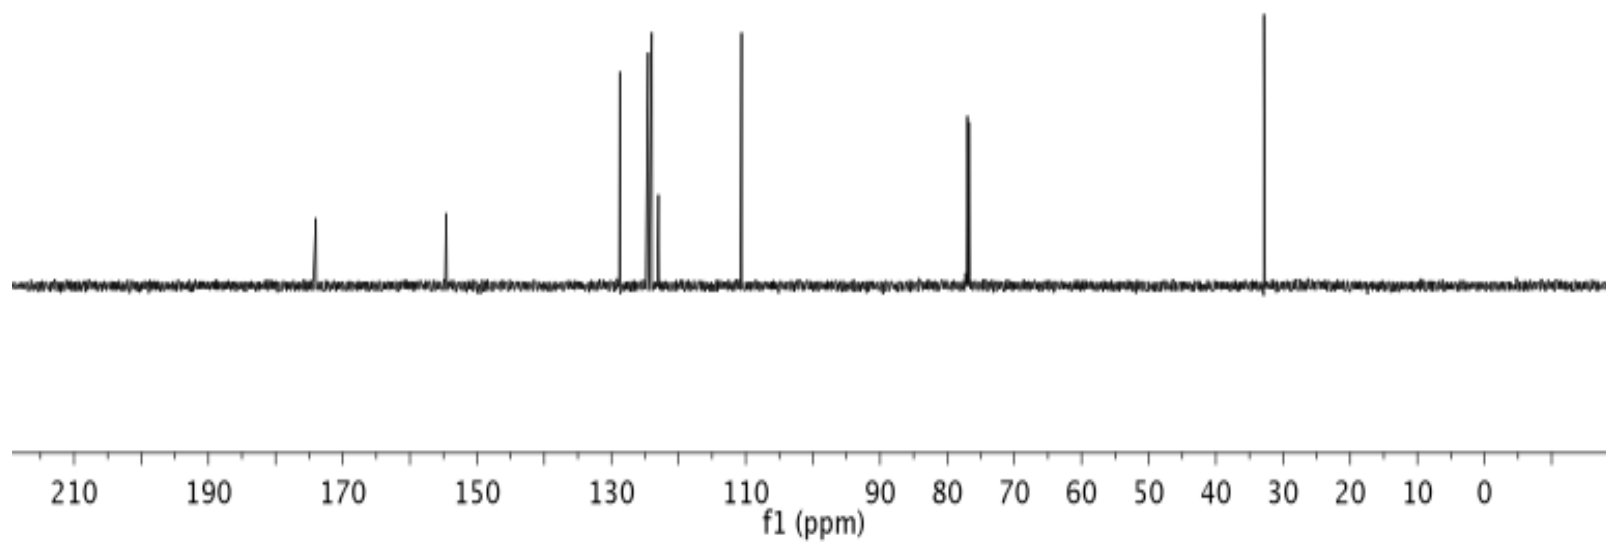

<sup>13</sup>C NMR (128.5 MHz, CDCl<sub>3</sub>) Spectrum of Benzofuran-2(3H)-one (3f)

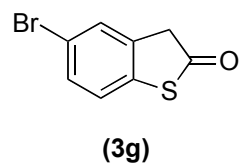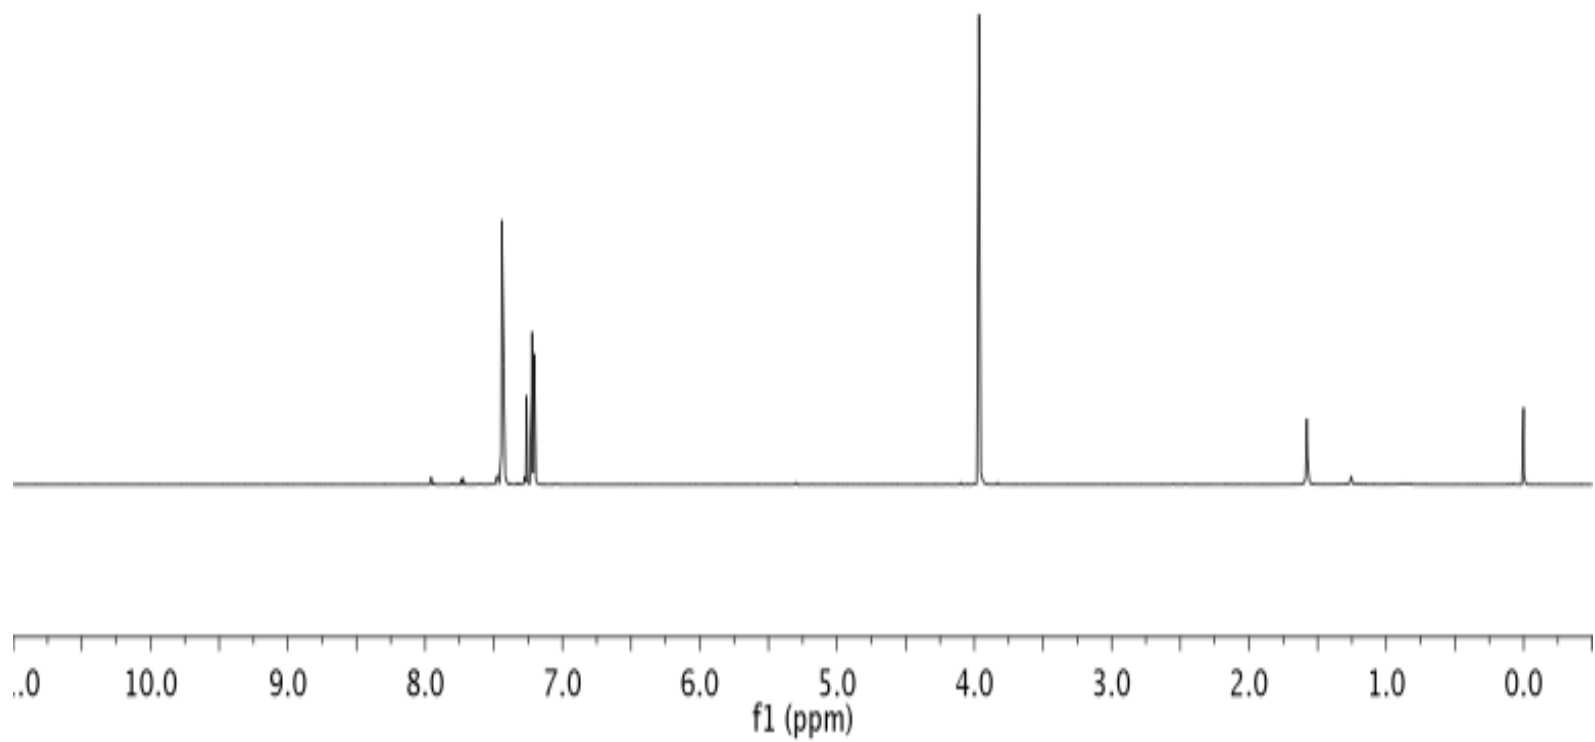

<sup>1</sup>H NMR (500 MHz, CDCl<sub>3</sub>) Spectrum of 5-Bromobenzo[*b*]thiophen-2(3*H*)-one (3g)

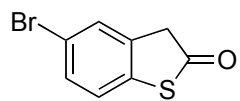

(3g)

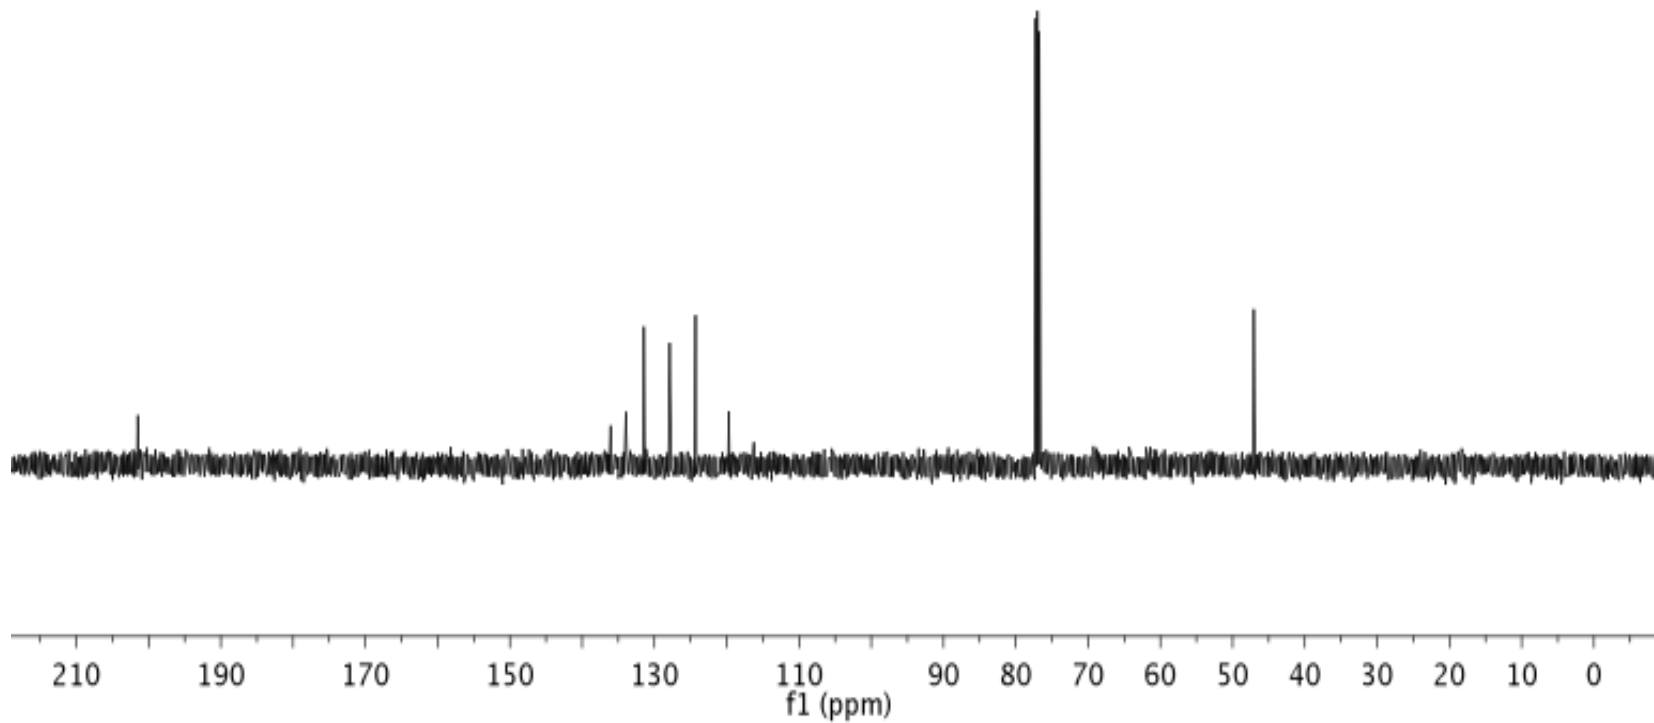

$^{13}\text{C}$  NMR (128.5 MHz,  $\text{CDCl}_3$ ) Spectrum of 5-Bromobenzo[*b*]thiophen-2(3*H*)-one (3g)



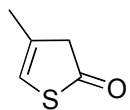

(3h)

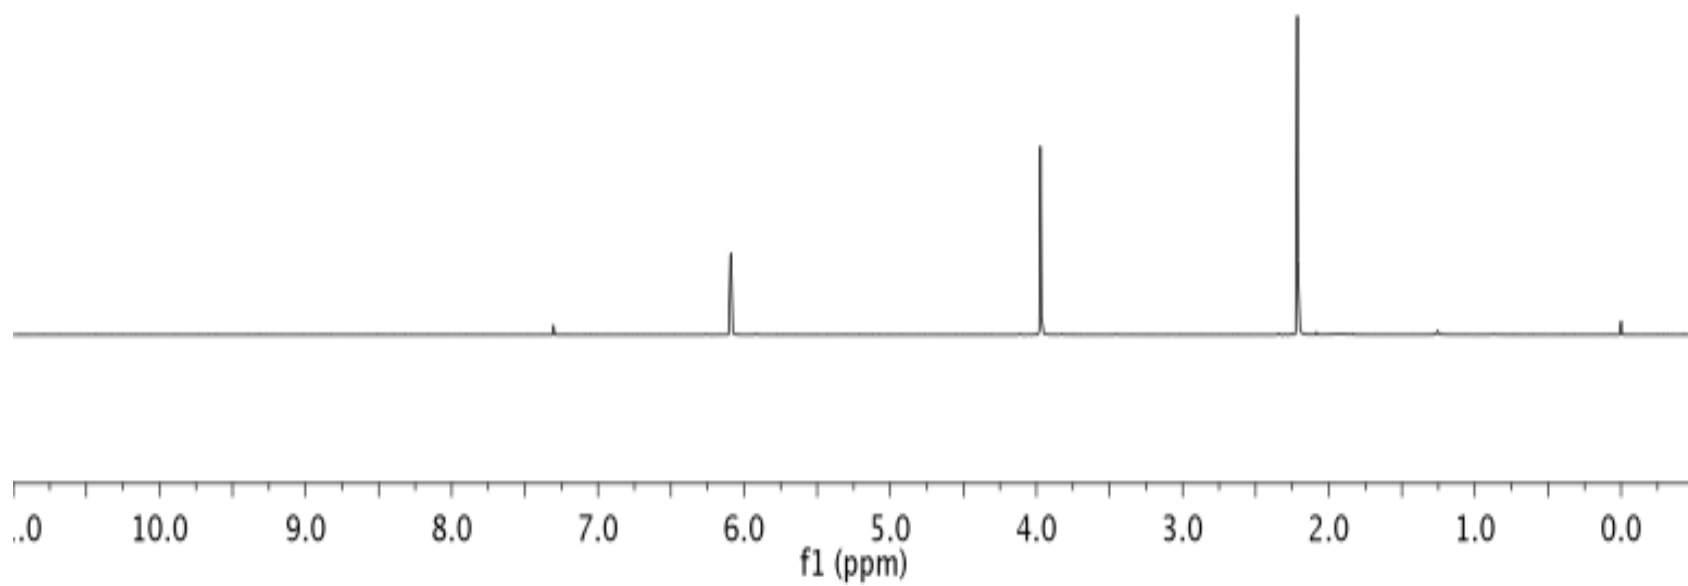

<sup>1</sup>H NMR (500 MHz, CDCl<sub>3</sub>) Spectrum of 4-Methylthiophen-2(3H)-one (3h)

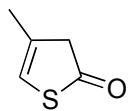

(3h)

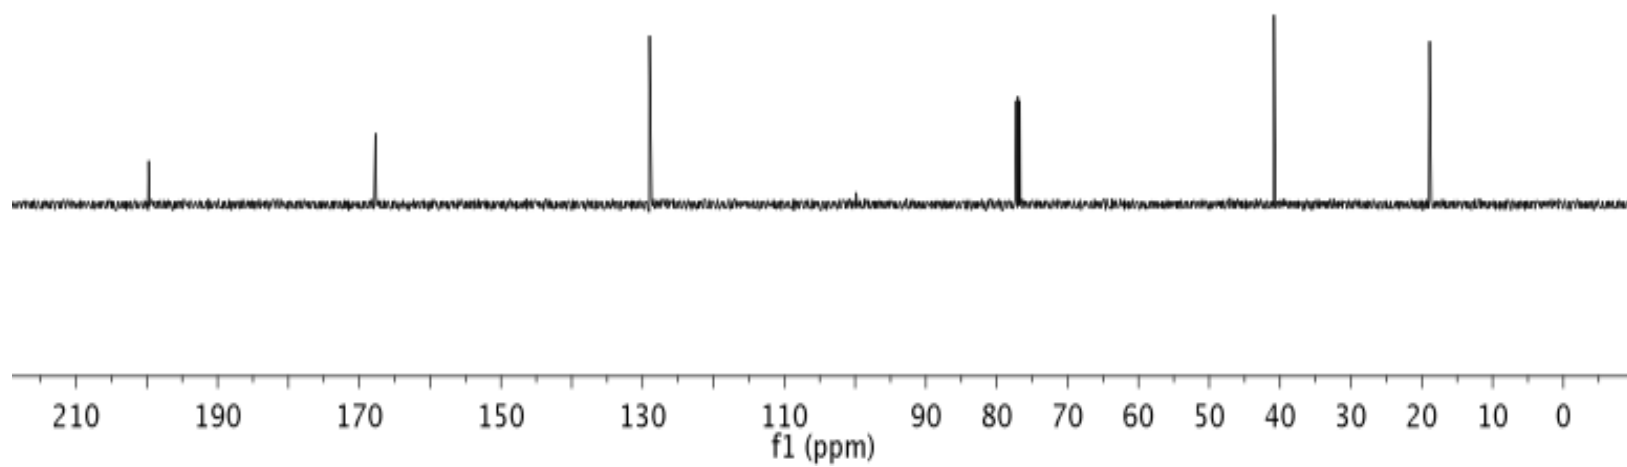

$^{13}\text{C}$  NMR (128.5 MHz,  $\text{CDCl}_3$ ) Spectrum of 4-Methylthiophen-2(3H)-one (3h)

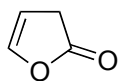

(3i)

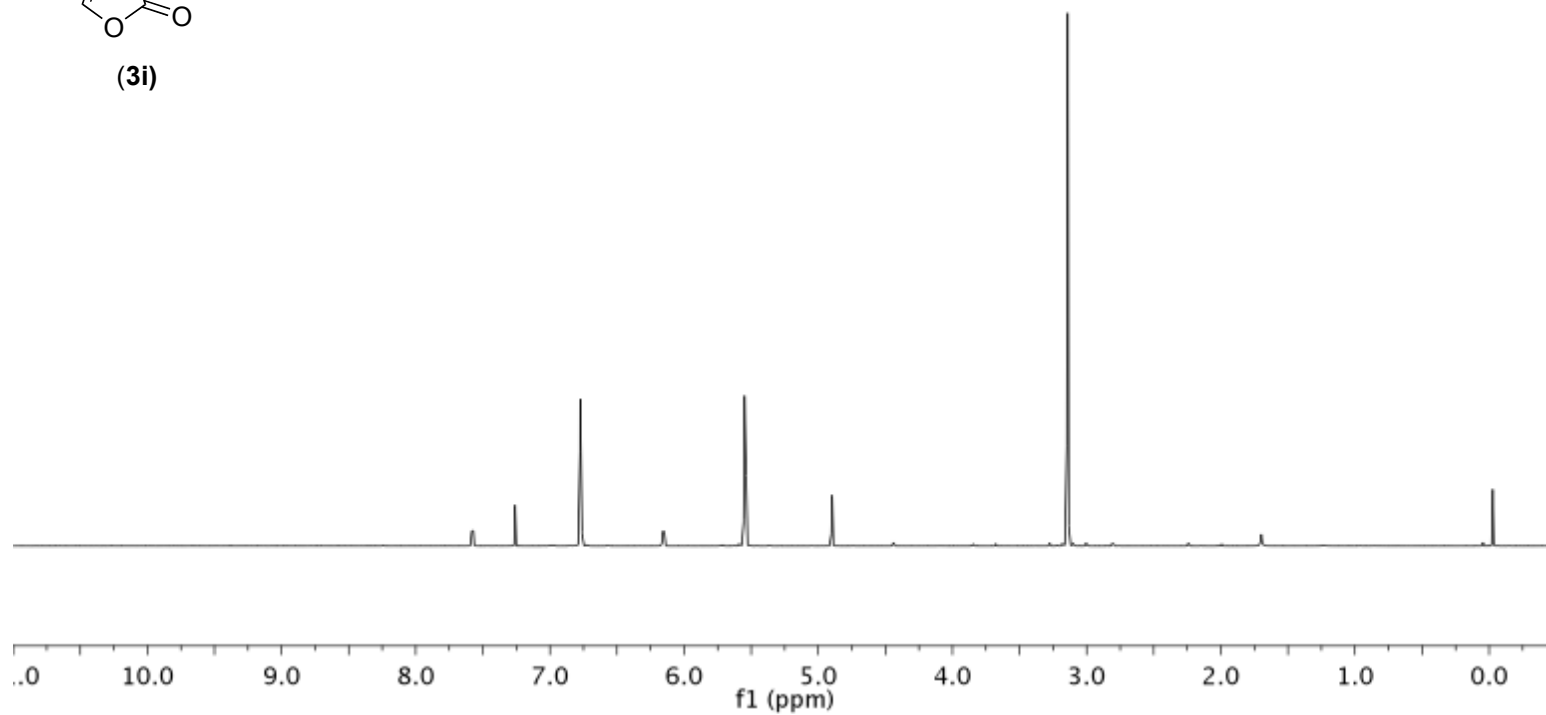

<sup>1</sup>H NMR (500 MHz, CDCl<sub>3</sub>) Spectrum of Furan-2(3H)-one (3i)



(3i)

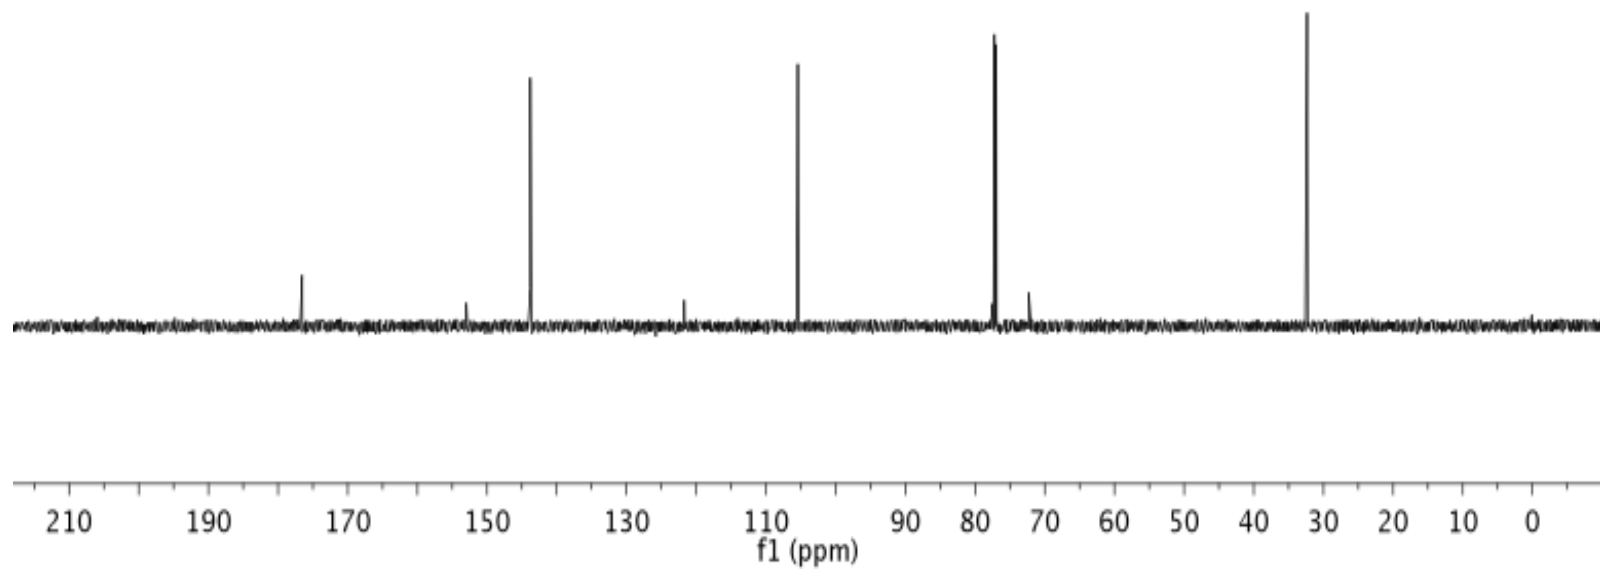

<sup>13</sup>C NMR (128.5 MHz, CDCl<sub>3</sub>) Spectrum of Furan-2(3H)-one (3i)

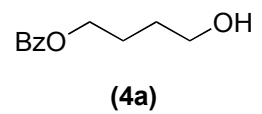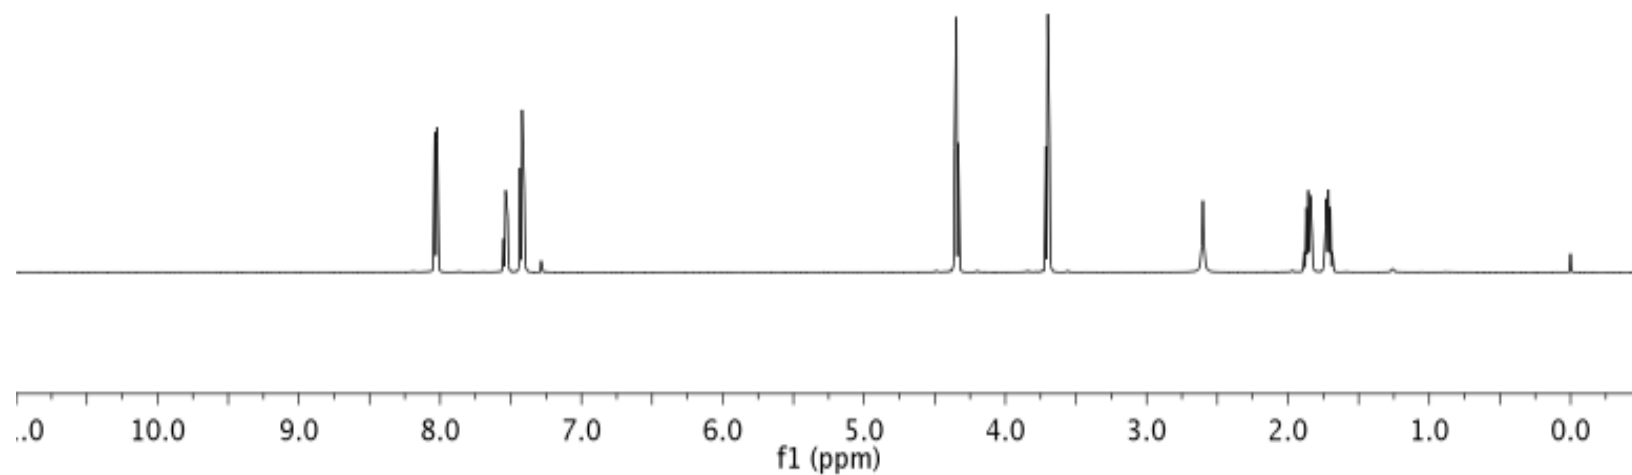

<sup>1</sup>H NMR (500 MHz, CDCl<sub>3</sub>) Spectrum of 4-hydroxybutyl benzoate (4a)

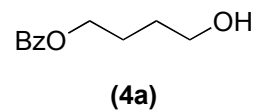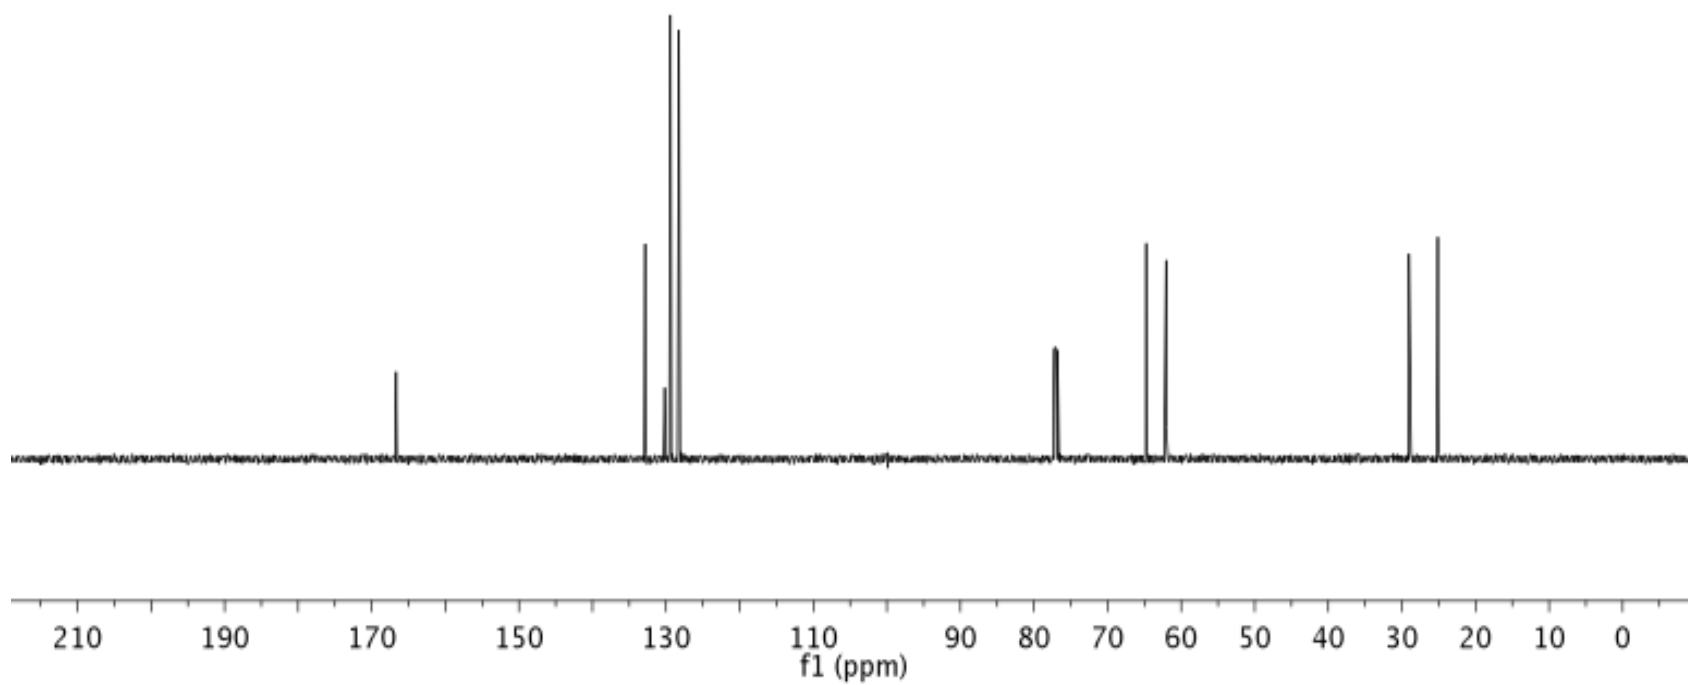

<sup>13</sup>C NMR (128.5 MHz, CDCl<sub>3</sub>) Spectrum of 4-Hydroxybutyl benzoate (4a)

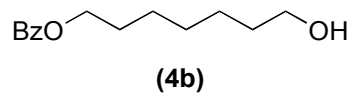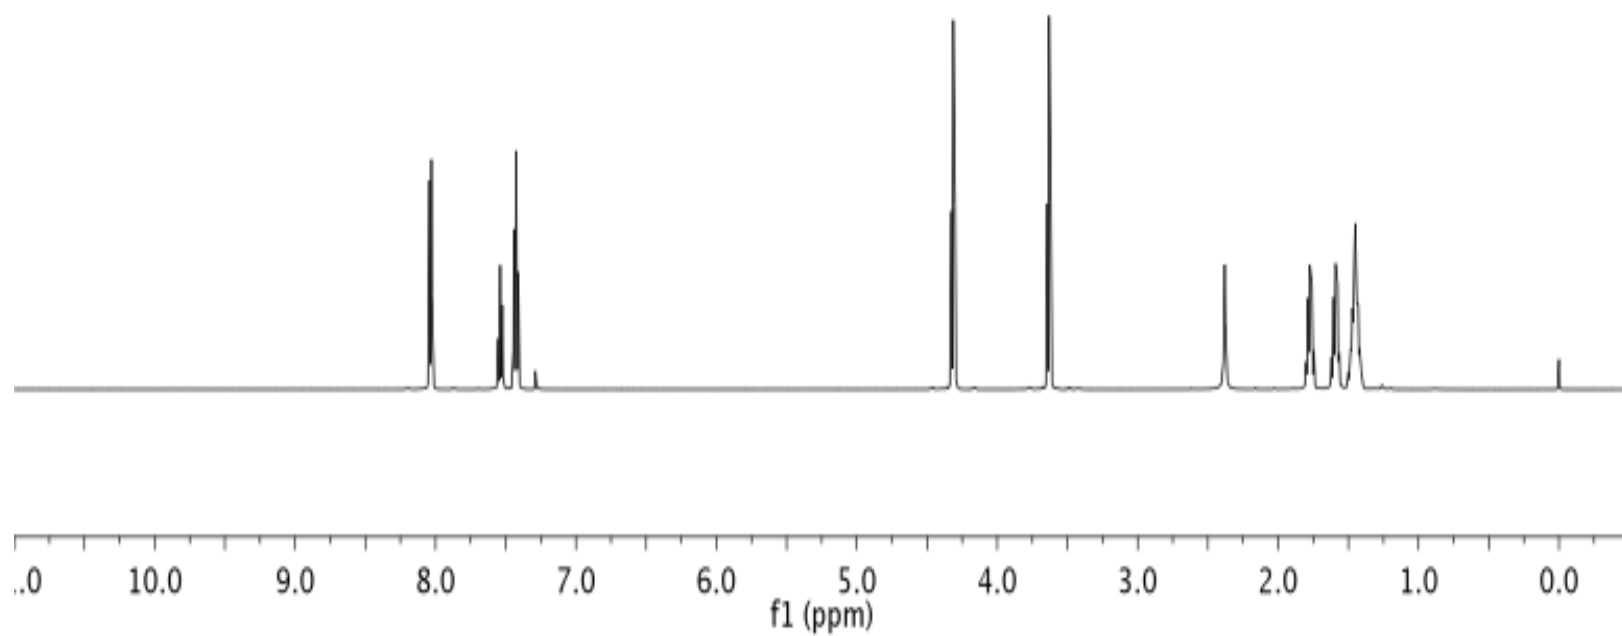

<sup>1</sup>H NMR (500 MHz, CDCl<sub>3</sub>) Spectrum of 7-Hydroxyheptylbenzoate (4b)

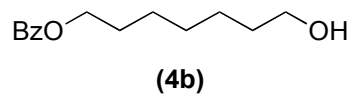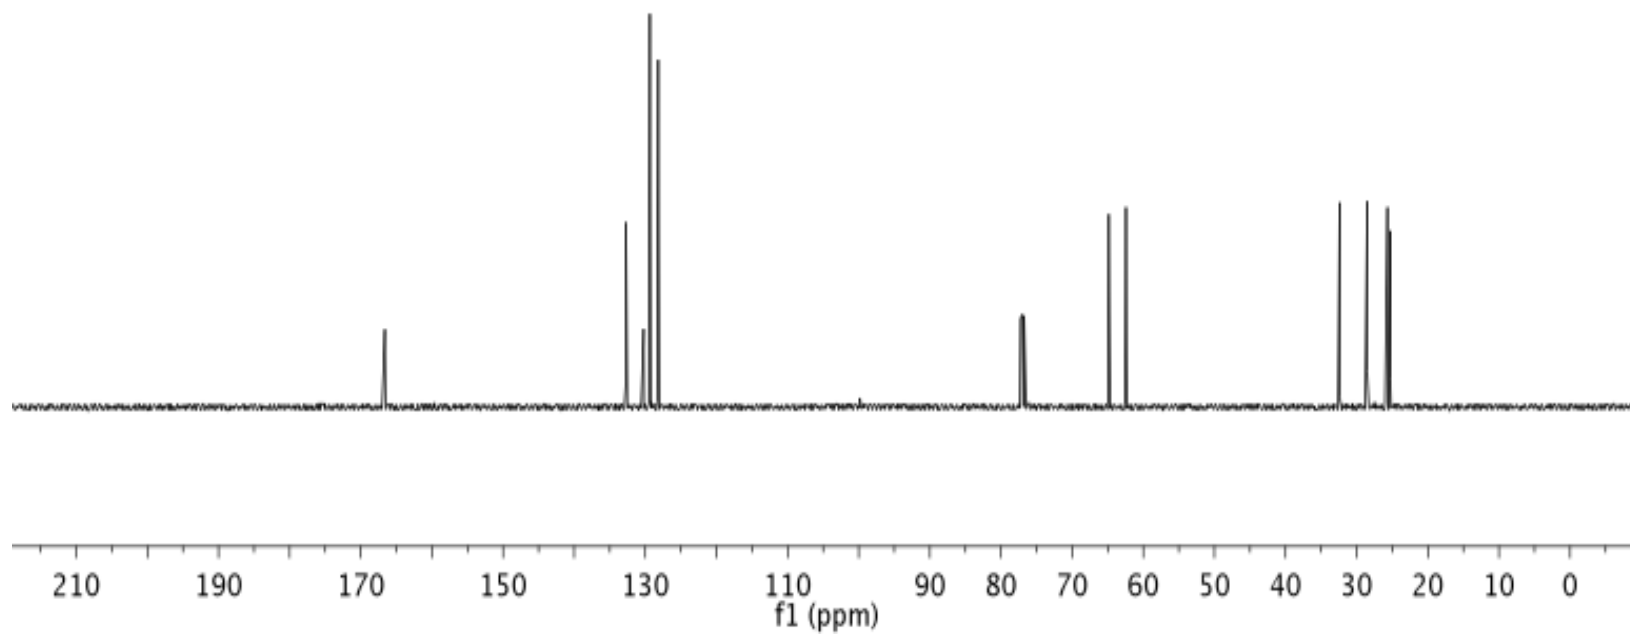

<sup>13</sup>C NMR (128.5 MHz, CDCl<sub>3</sub>) Spectrum of 7-Hydroxyheptylbenzoate (4b)



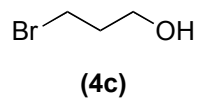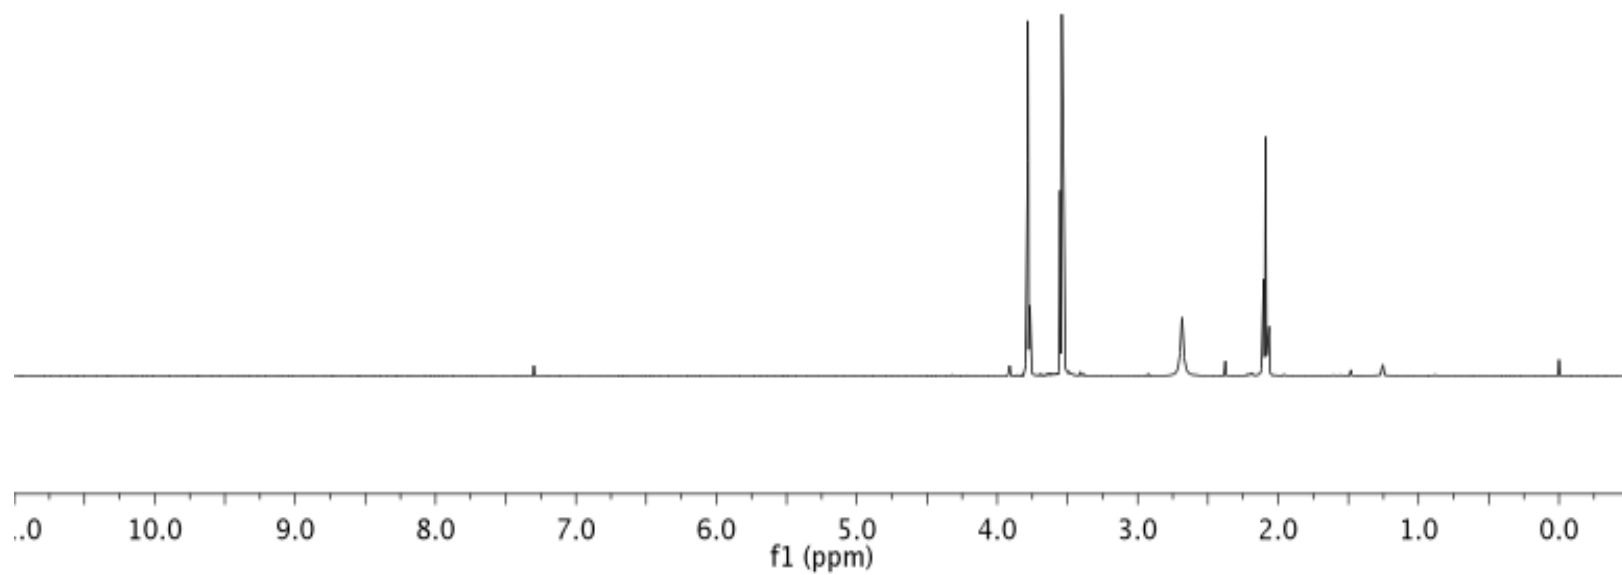

<sup>1</sup>H NMR (500 MHz, CDCl<sub>3</sub>) Spectrum of 3-Bromopropan-1-ol (4c)

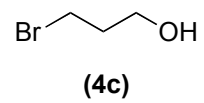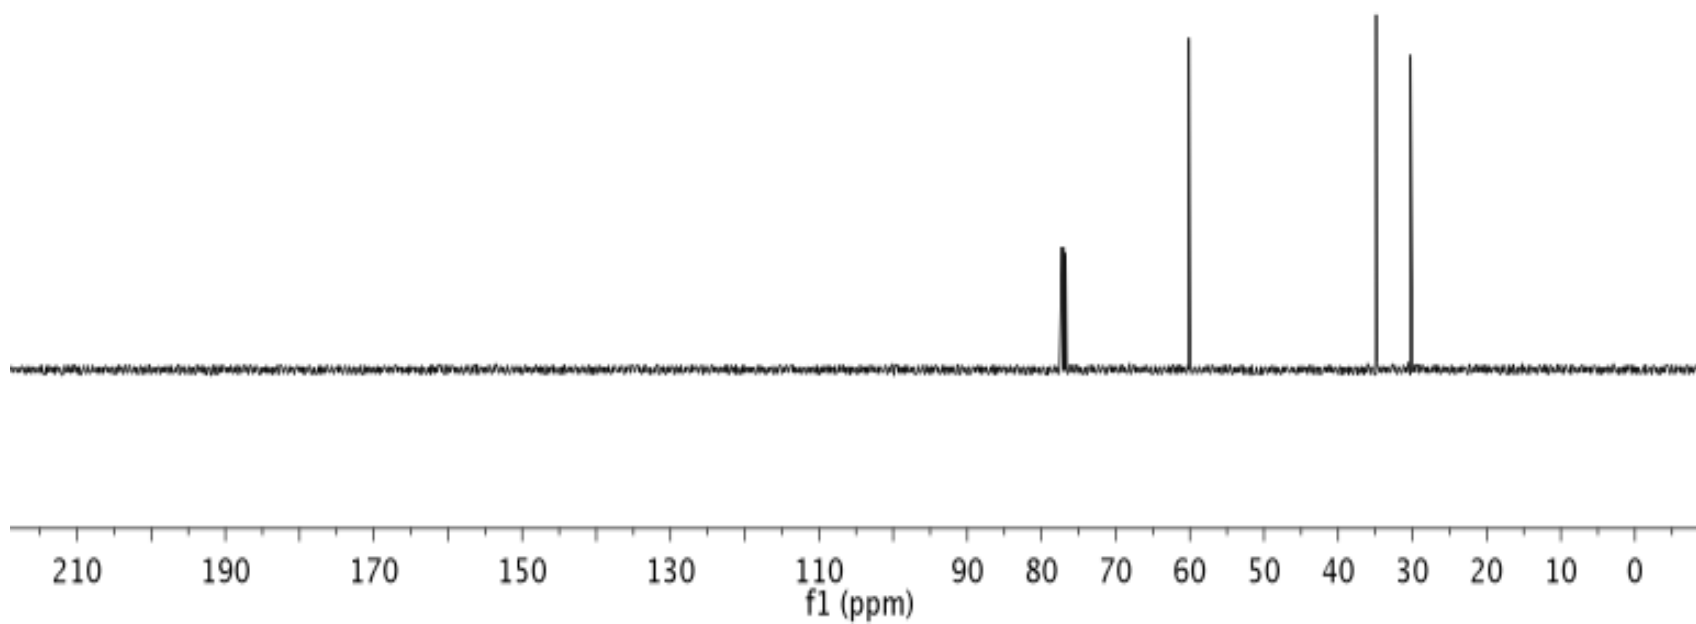

$^{13}\text{C}$  NMR (128.5 MHz,  $\text{CDCl}_3$ ) Spectrum of 3-Bromopropan-1-ol (4c)

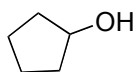

(4d)

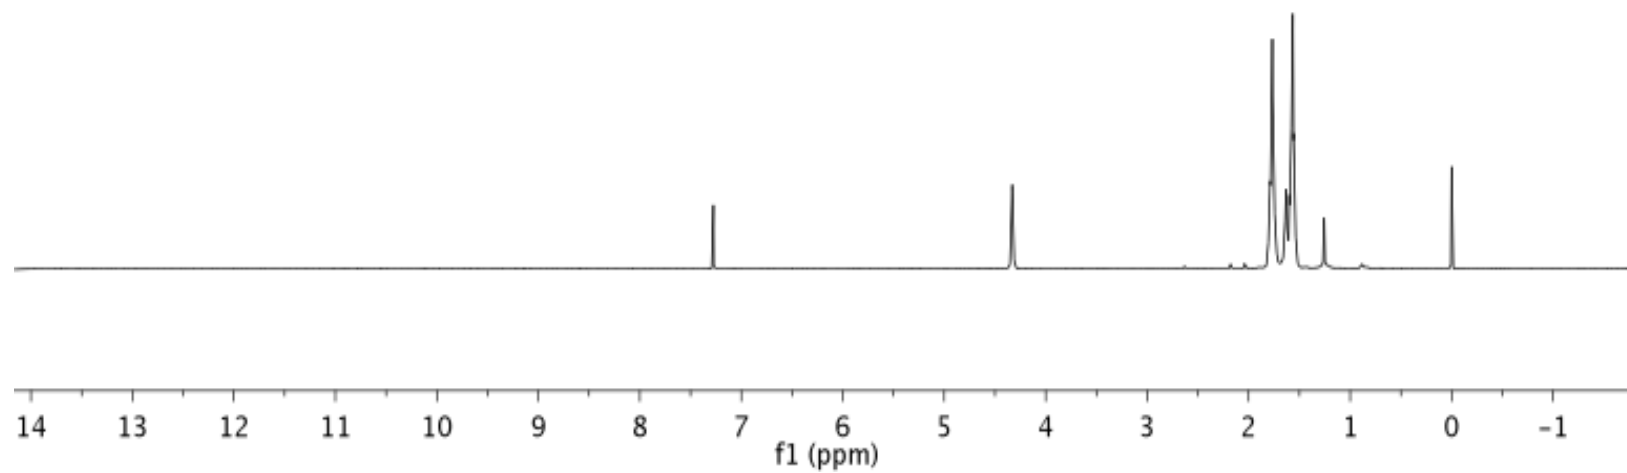

<sup>1</sup>H NMR (500 MHz, CDCl<sub>3</sub>) Spectrum of Cyclopentanol (4d)

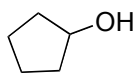

(4d)

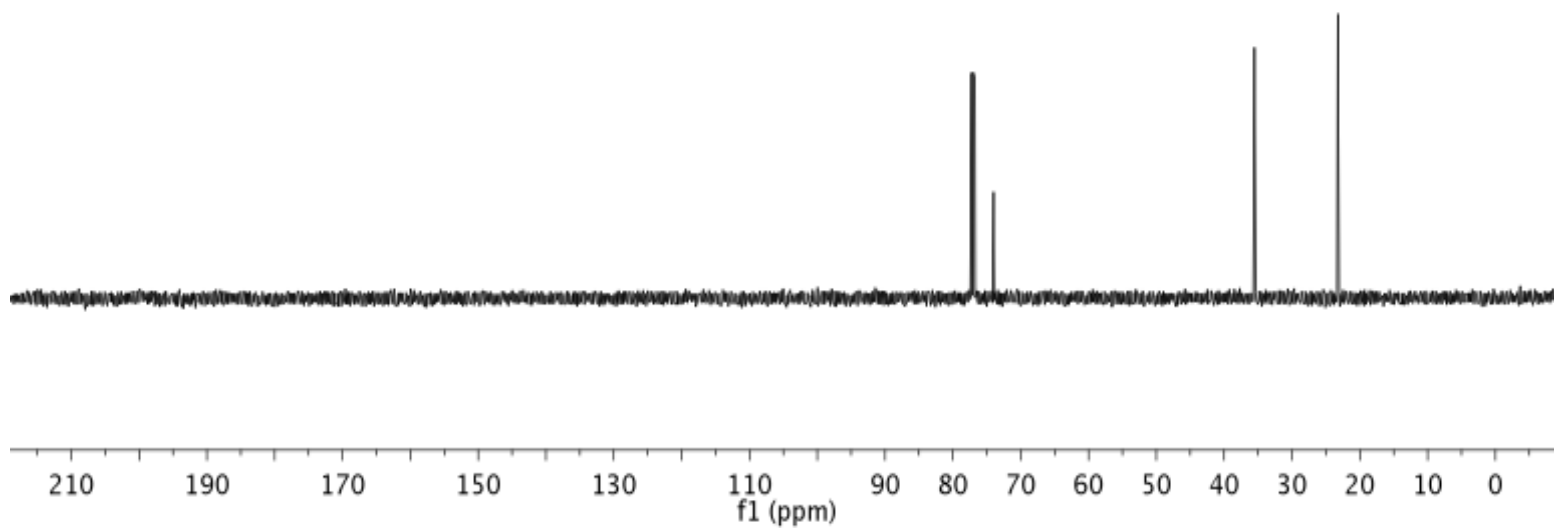

<sup>13</sup>C NMR (128.5 MHz, CDCl<sub>3</sub>) Spectrum of Cyclopentanol (4d)

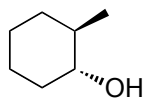

(4e)

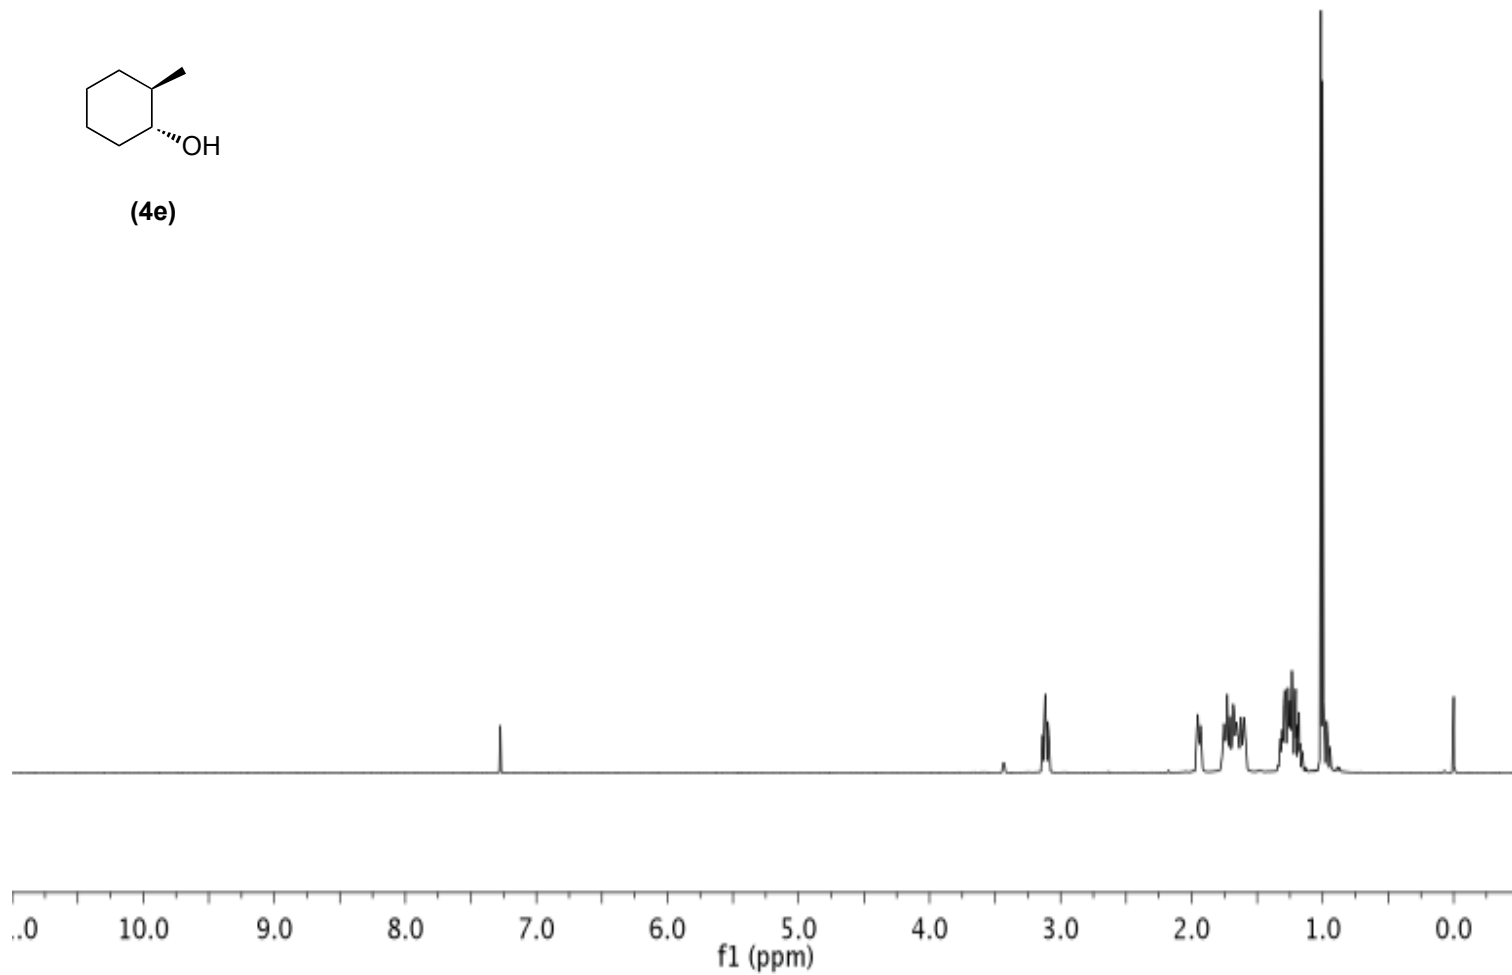

<sup>1</sup>H NMR (500 MHz, CDCl<sub>3</sub>) Spectrum of *trans*-2-Methylcyclohexanol (4e)

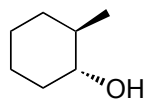

(4e)

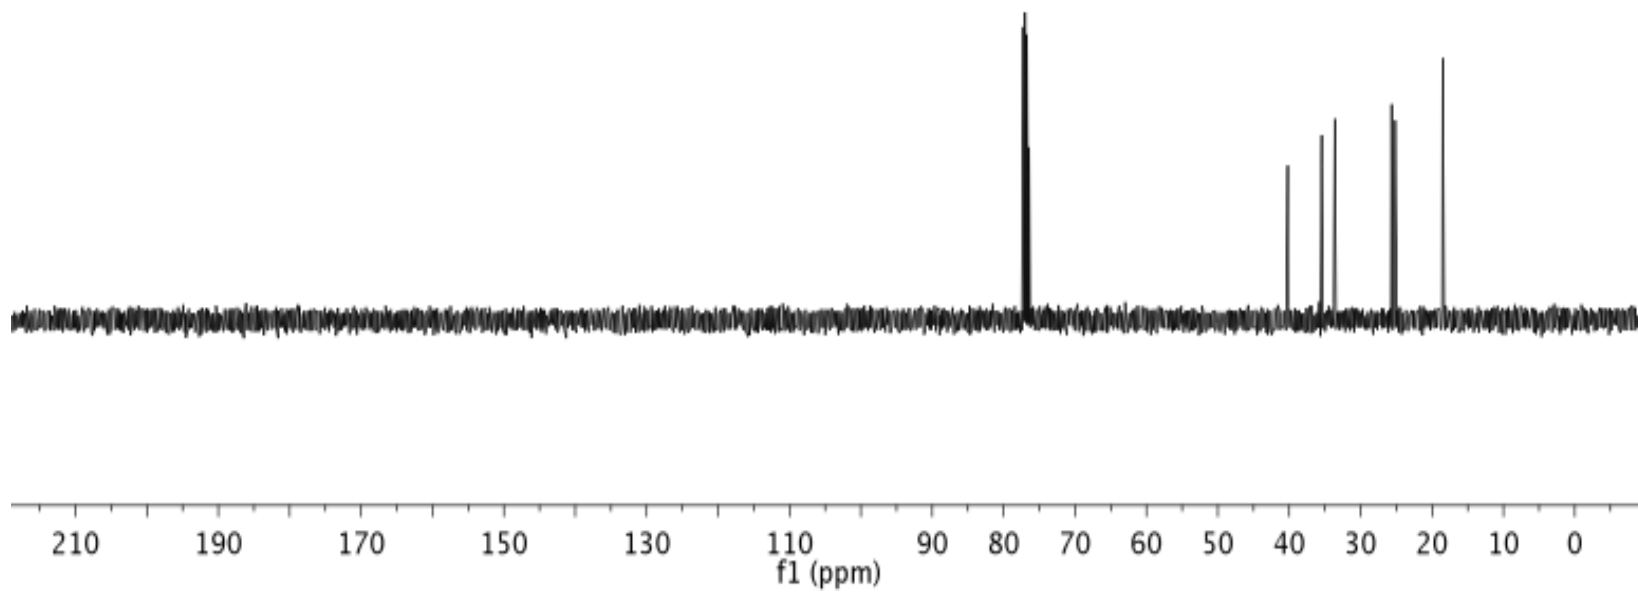

$^{13}\text{C}$  NMR (128.5 MHz,  $\text{CDCl}_3$ ) Spectrum of *trans*-2-Methylcyclohexanol (4e)

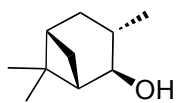

(4f)

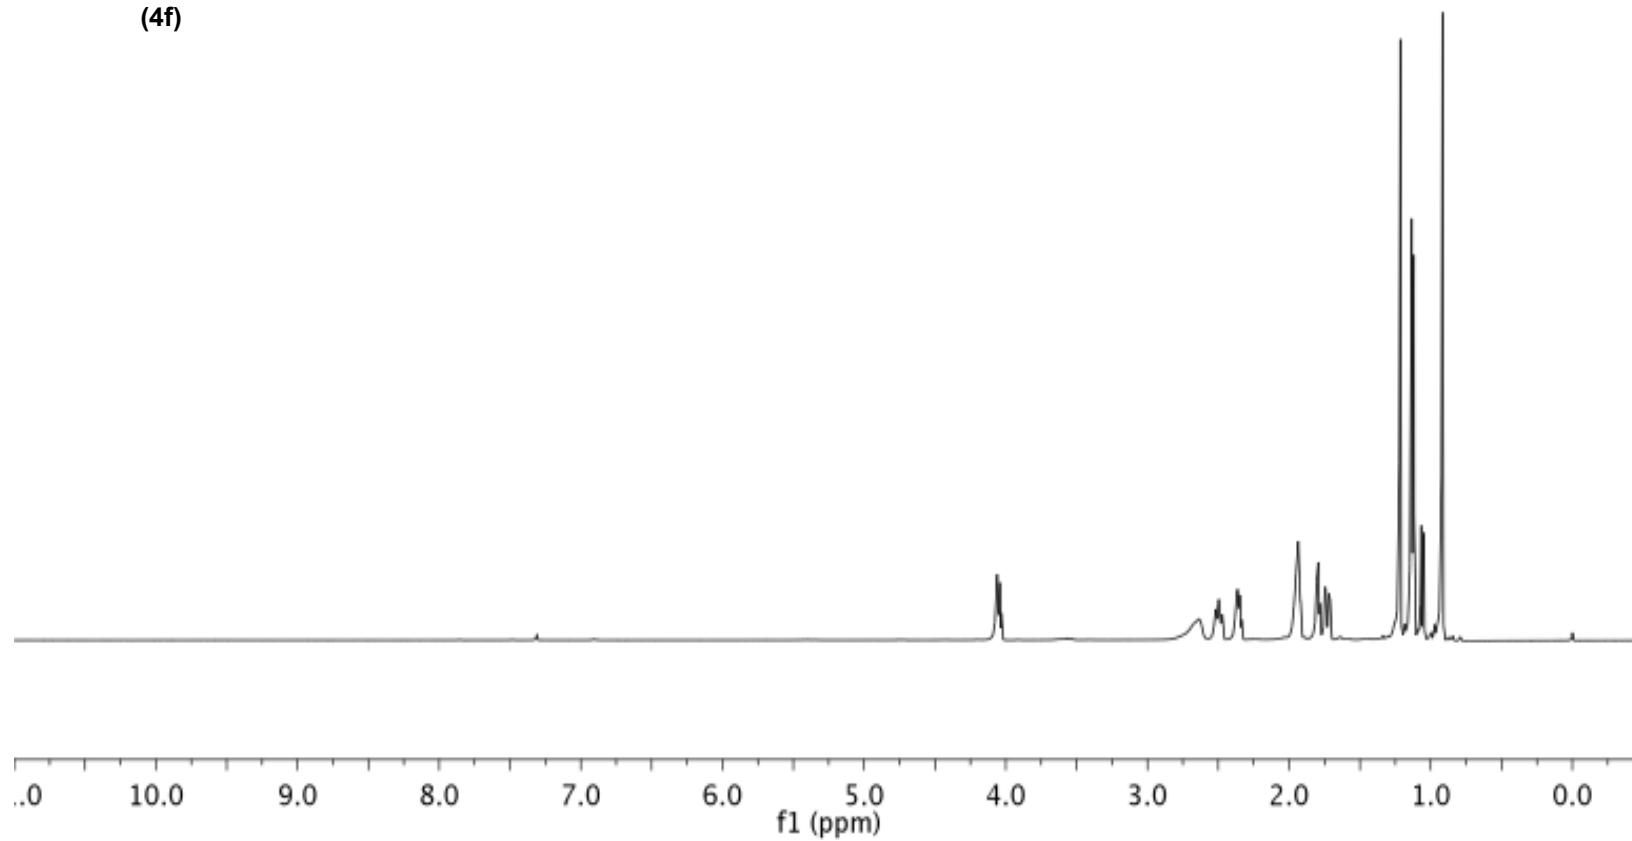

<sup>1</sup>H NMR (500 MHz, CDCl<sub>3</sub>) Spectrum of 3,6,6-Trimethylbicyclo[3.1.1]heptan-2-ol (4f)

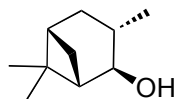

(4f)

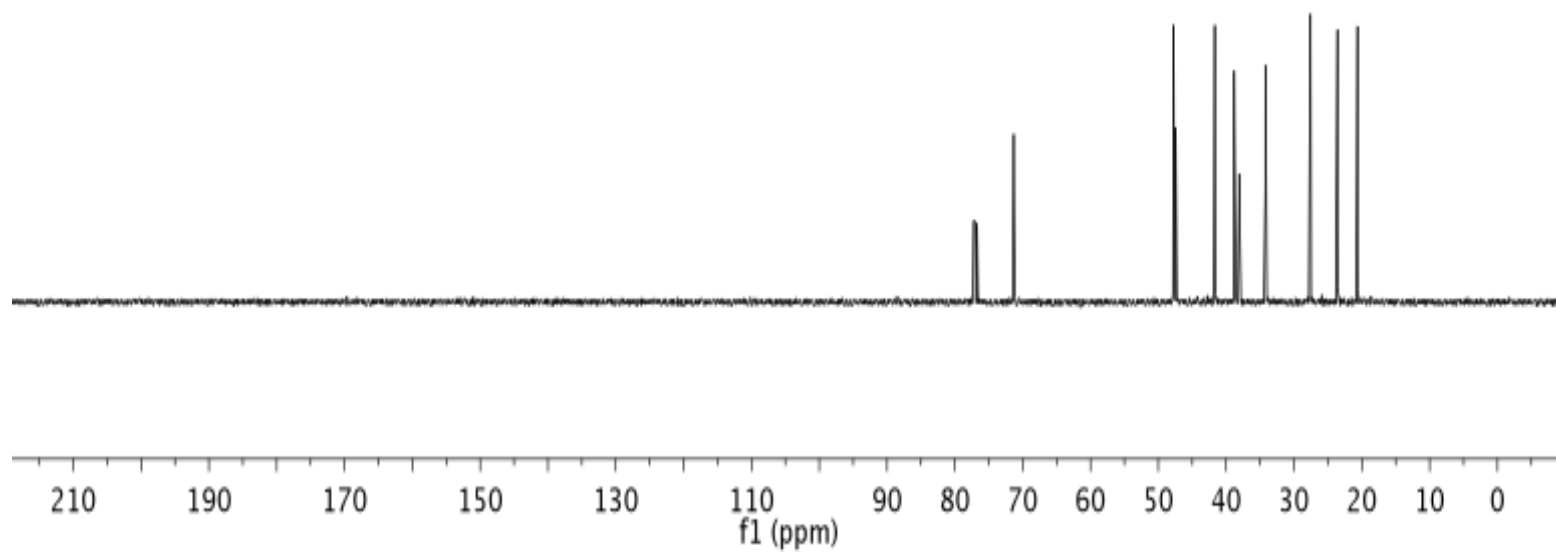

$^{13}\text{C}$  NMR (128.5 MHz,  $\text{CDCl}_3$ ) Spectrum of 3,6,6-Trimethylbicyclo[3.1.1]heptan-2-ol (4f)



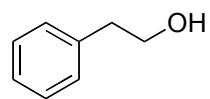

(4g)

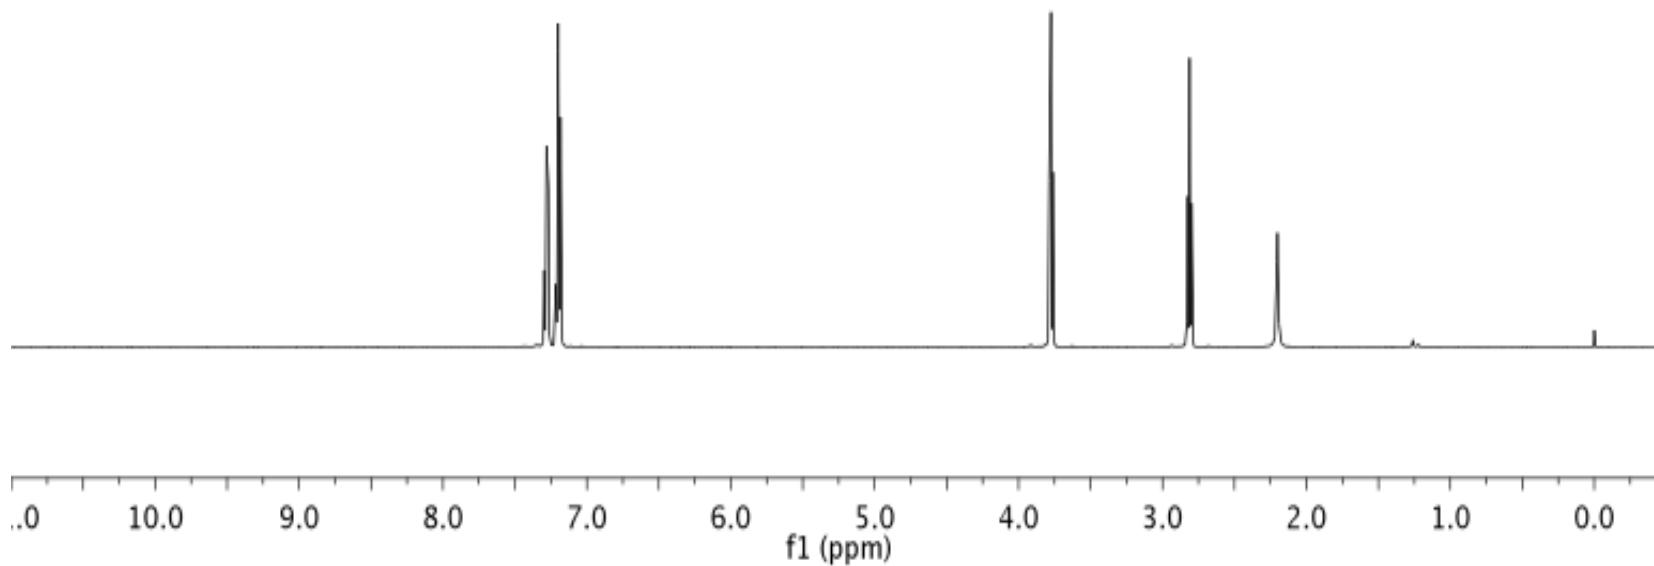

$^1\text{H}$  NMR (500 MHz,  $\text{CDCl}_3$ ) Spectrum of 2-Phenylethanol (4g)

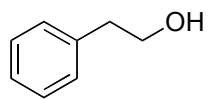

(4g)

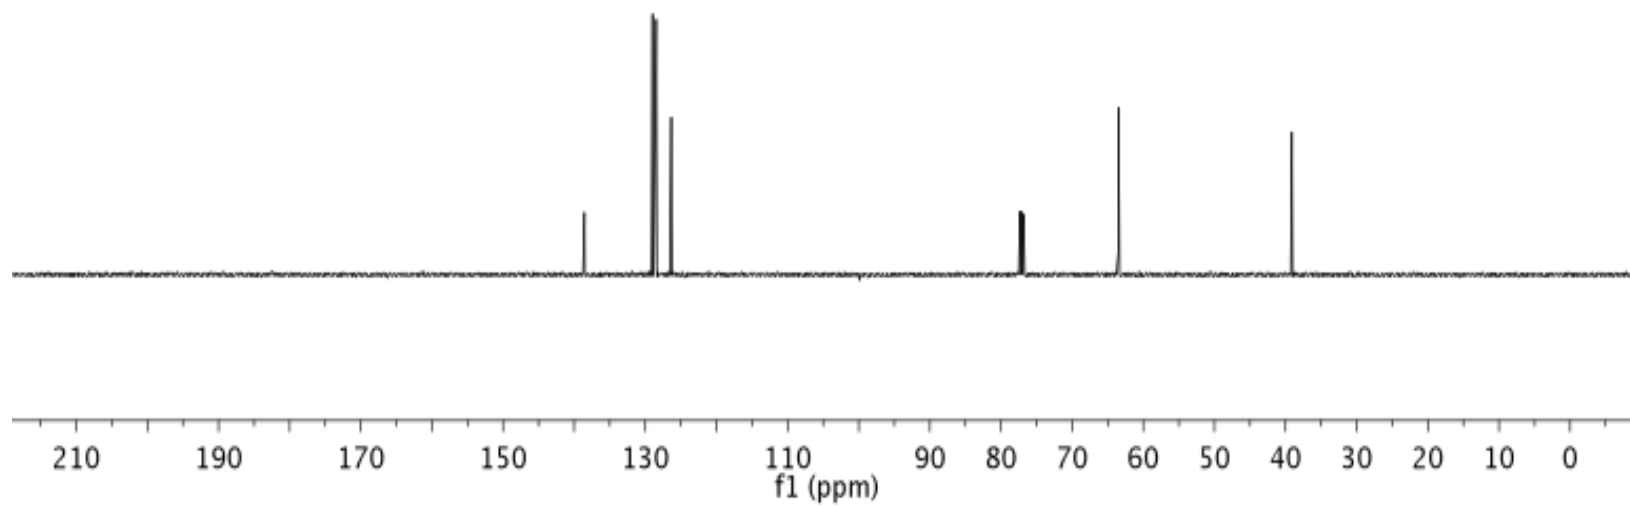

<sup>13</sup>C NMR (128.5 MHz, CDCl<sub>3</sub>) Spectrum of 2-Phenylethanol (4g)

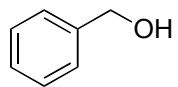

(4h)

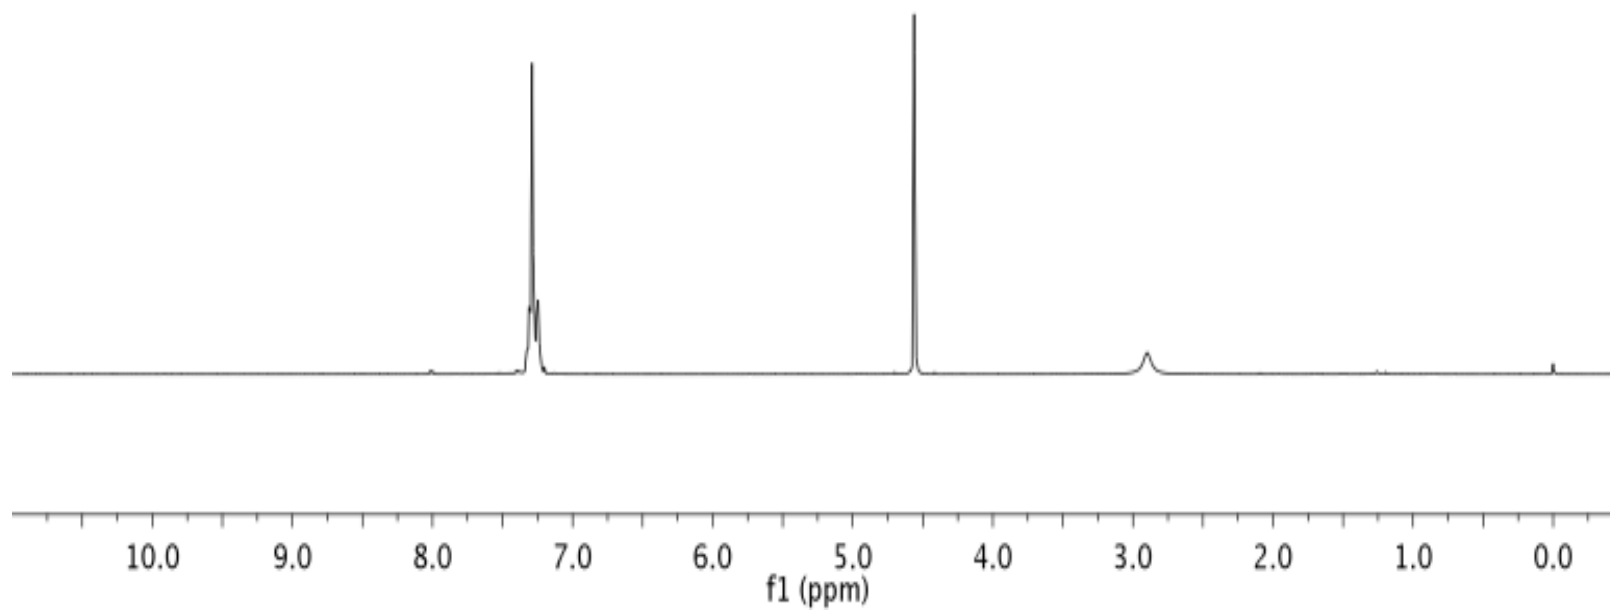

<sup>1</sup>H NMR (500 MHz, CDCl<sub>3</sub>) Spectrum of Phenylmethanol (4h)

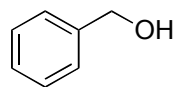

(4h)

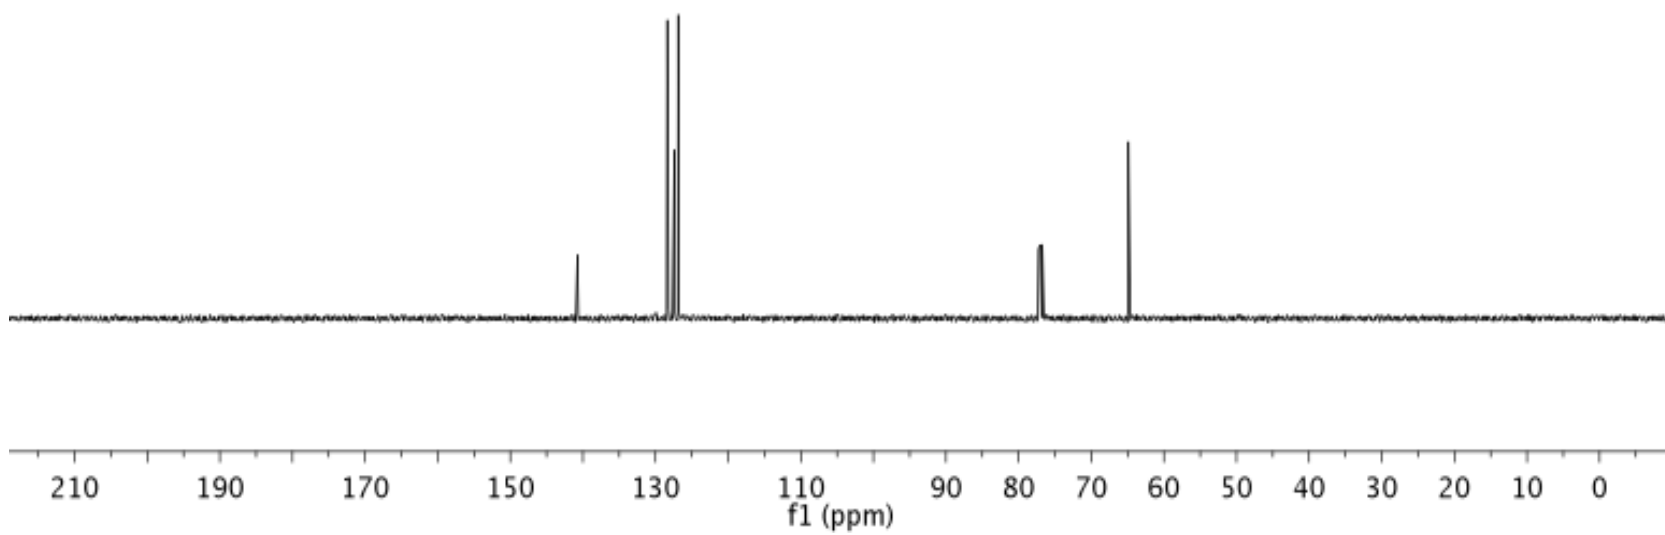

$^{13}\text{C}$  NMR (128.5 MHz,  $\text{CDCl}_3$ ) Spectrum of Phenylmethanol (4h)

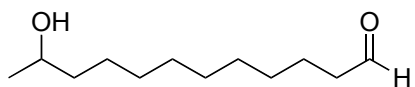

(4i)

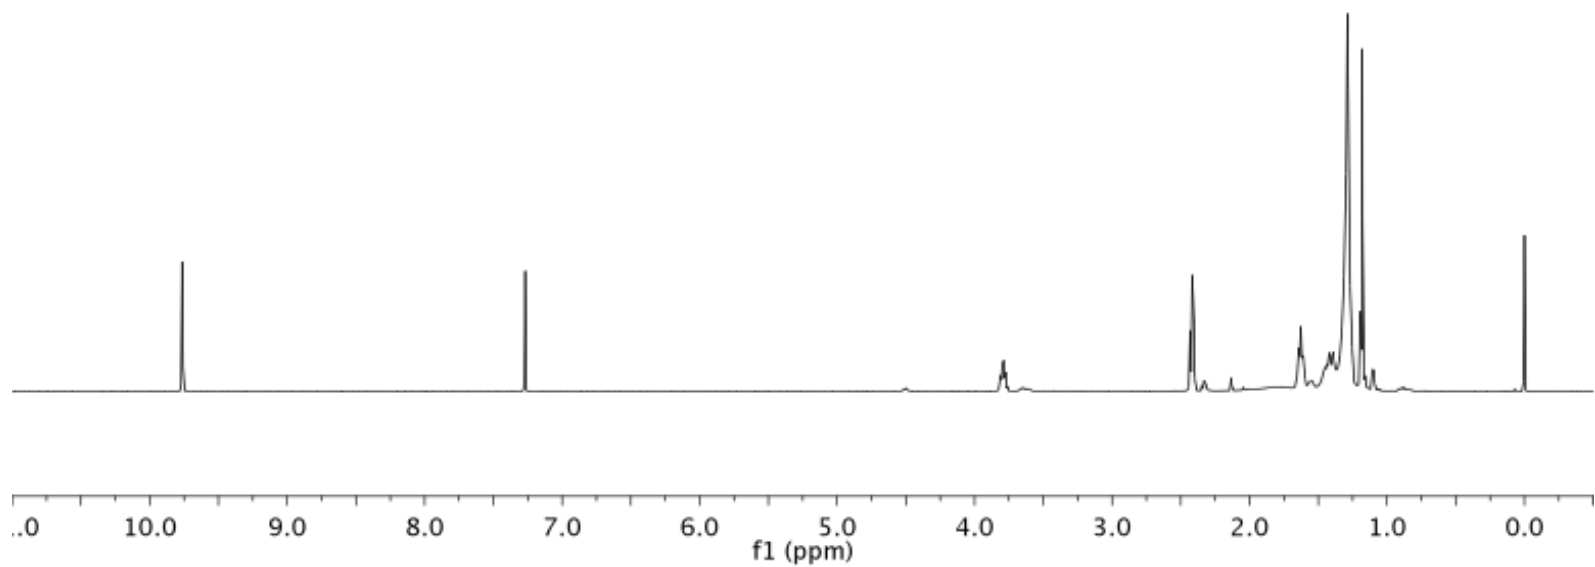

<sup>1</sup>H NMR (500 MHz, CDCl<sub>3</sub>) Spectrum of 11-Hydroxydodecanal (4i)

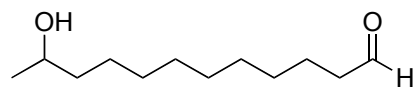

(4i)

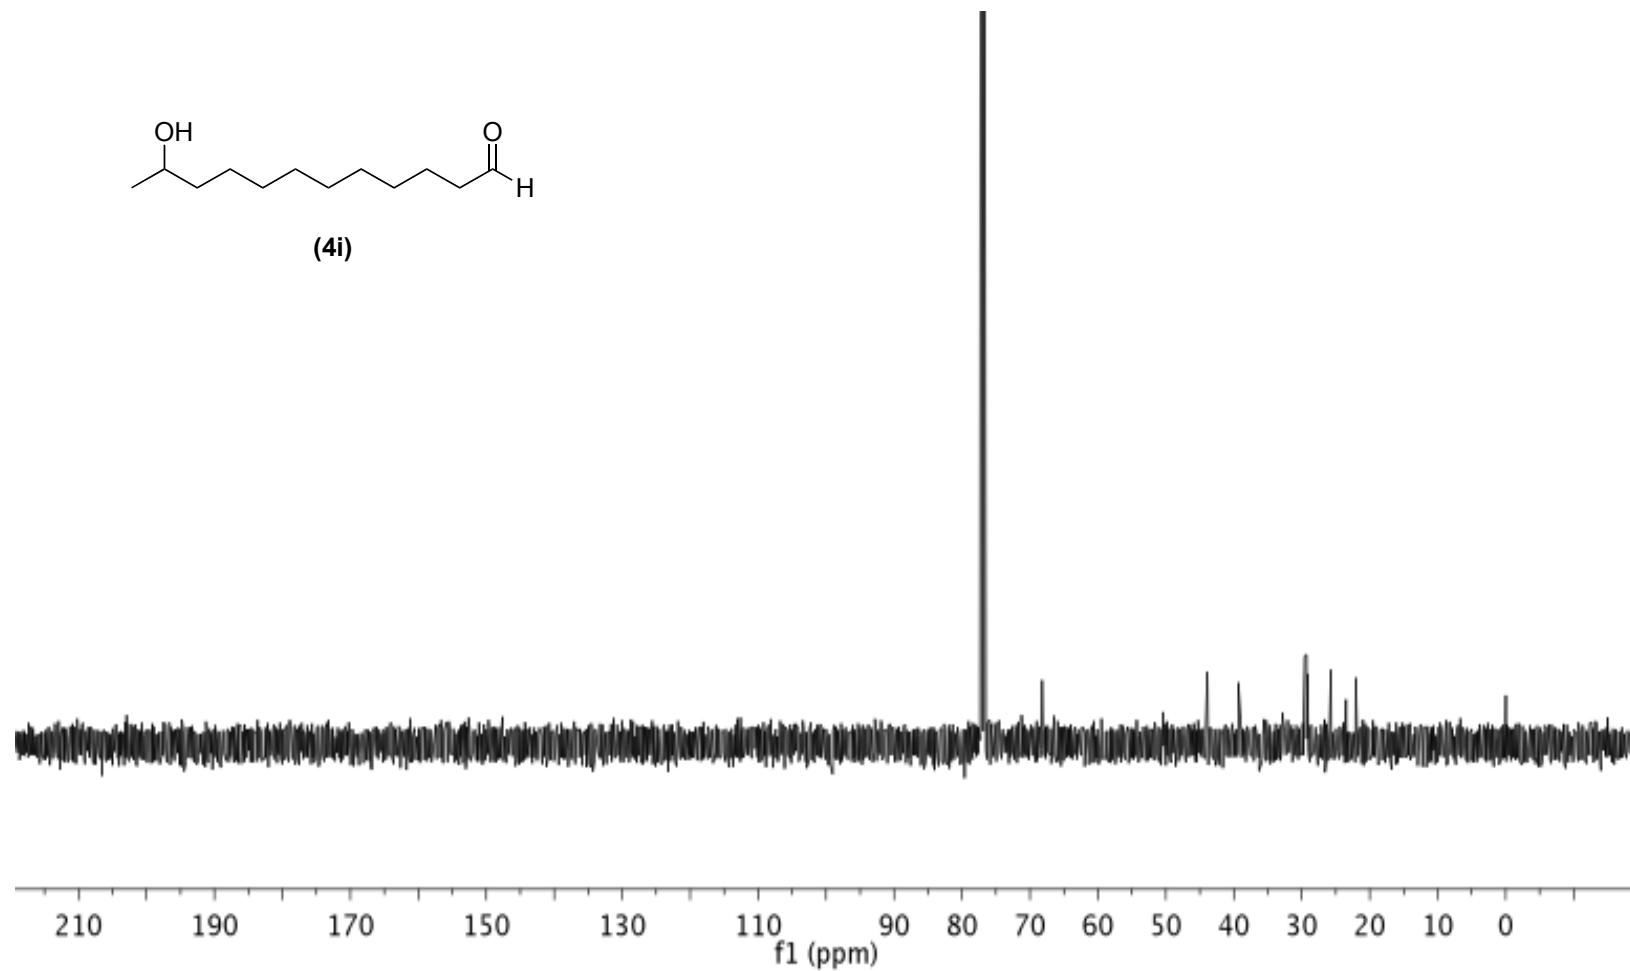

<sup>13</sup>C NMR (128.5 MHz, CDCl<sub>3</sub>) Spectrum of 11-Hydroxydodecanal (4i)

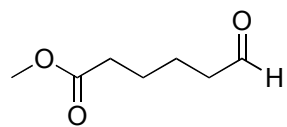

(4j)

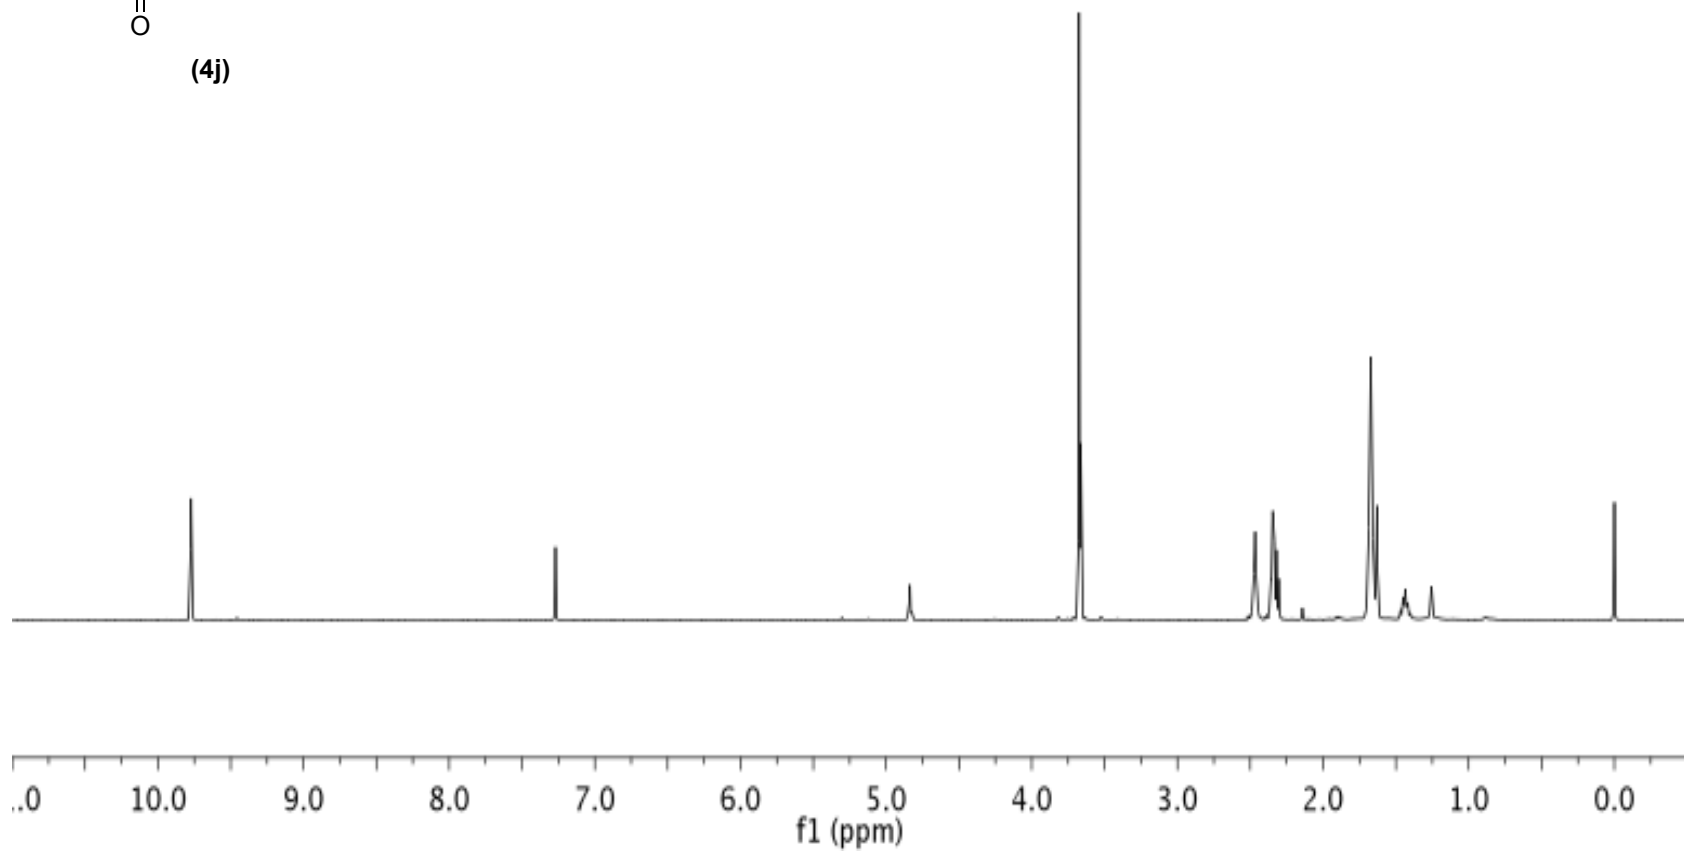

<sup>1</sup>H NMR (500 MHz, CDCl<sub>3</sub>) Spectrum of Methyl 6-Oxohexanoate (4j)

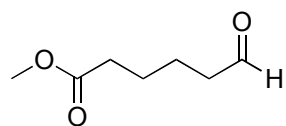

(4j)

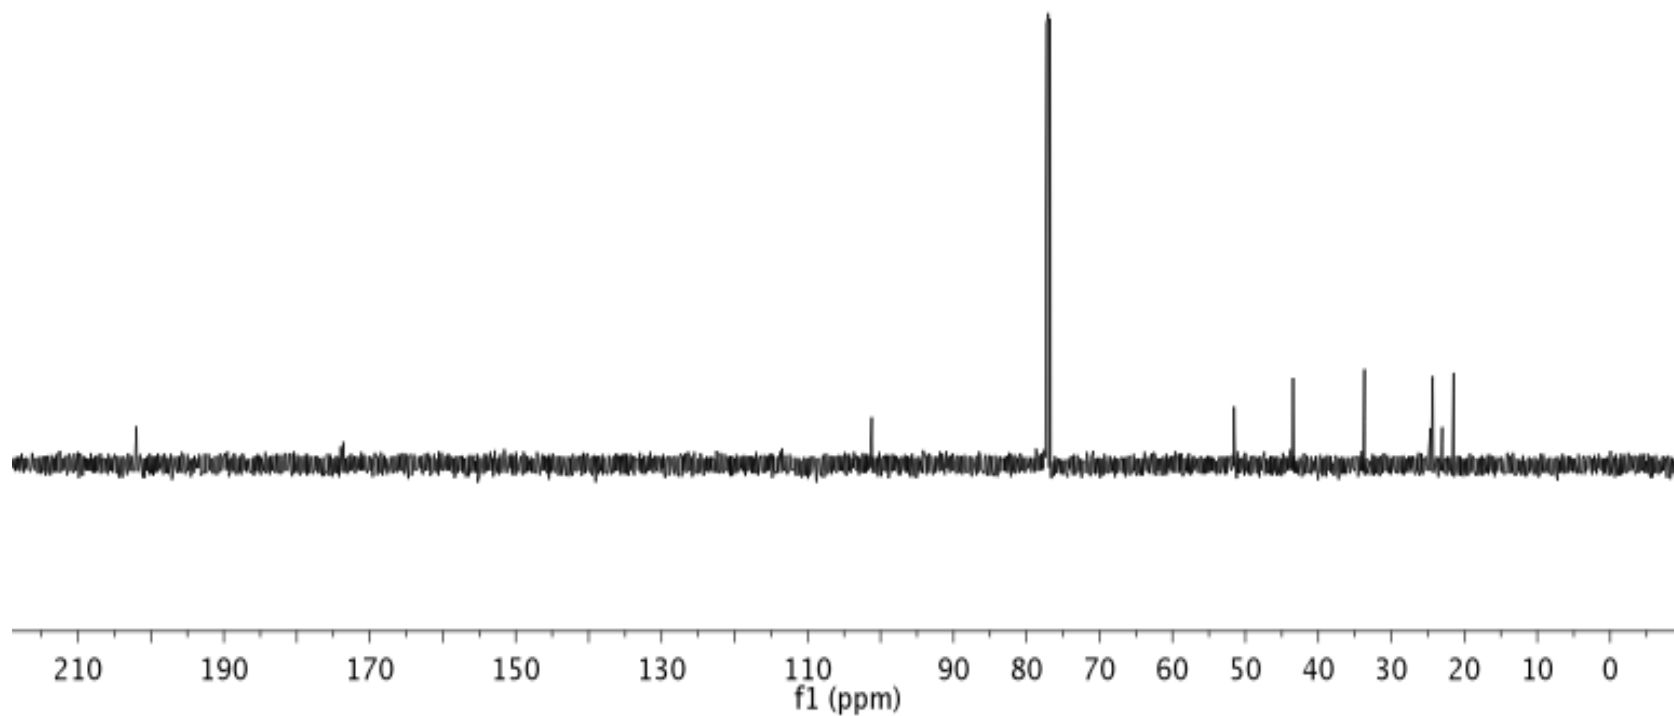

$^{13}\text{C}$  NMR (128.5 MHz,  $\text{CDCl}_3$ ) Spectrum of methyl 6-oxohexanoate (4j)



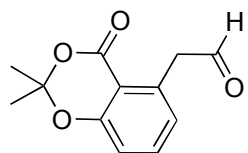

(4k)

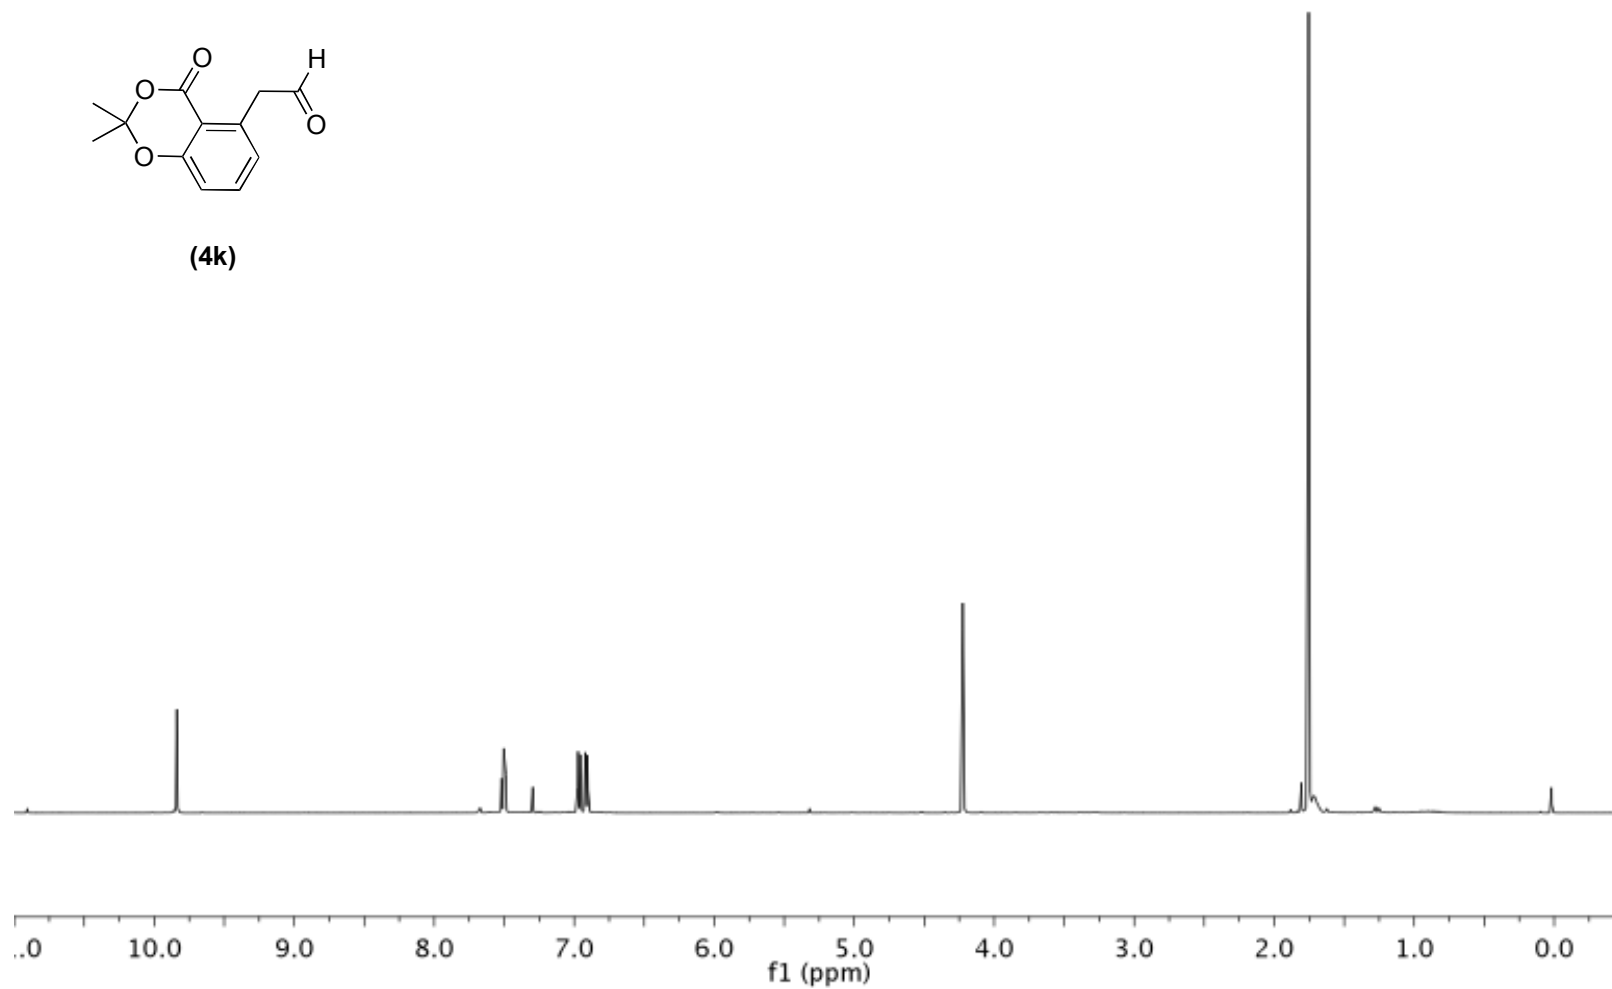

<sup>1</sup>H NMR (500 MHz, CDCl<sub>3</sub>) Spectrum of 2-(2,2-Dimethyl-4-oxo-4H-benzo[d][1,3]dioxin-5-yl)acetaldehyde (4k)



(4k)

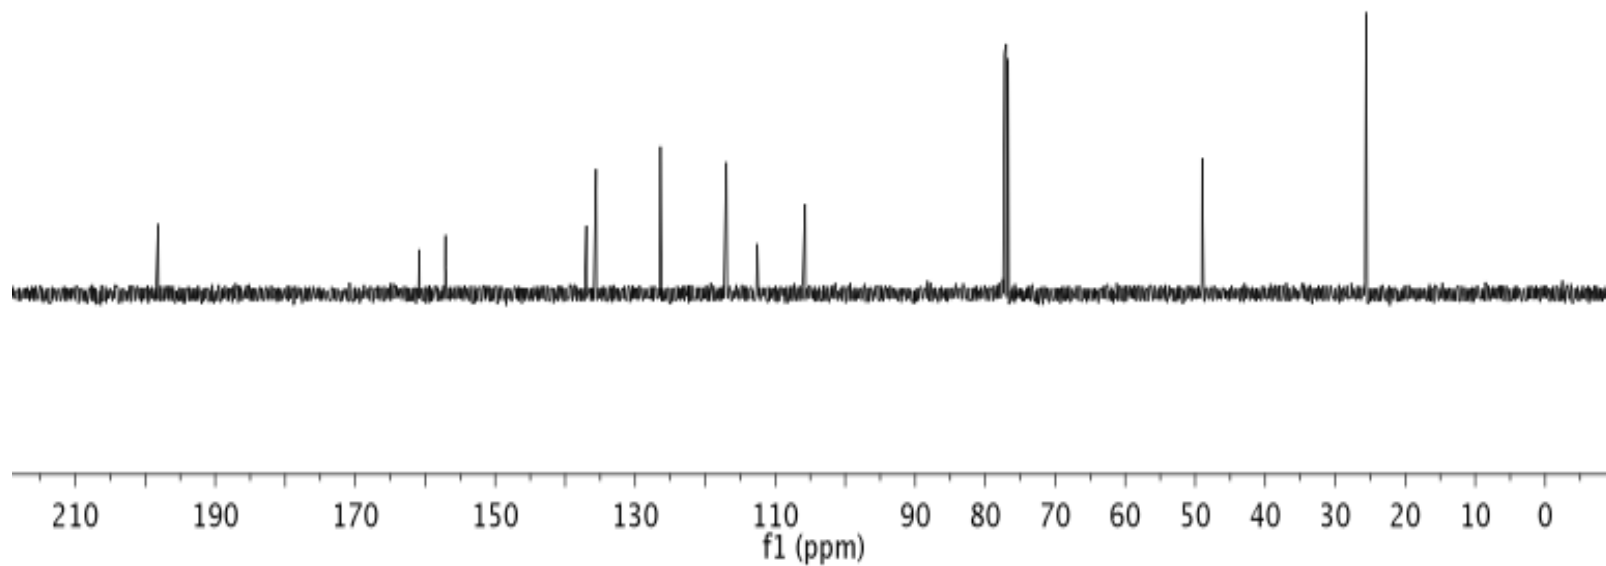

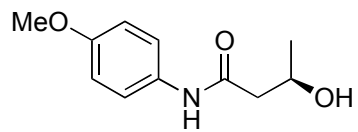

(5)

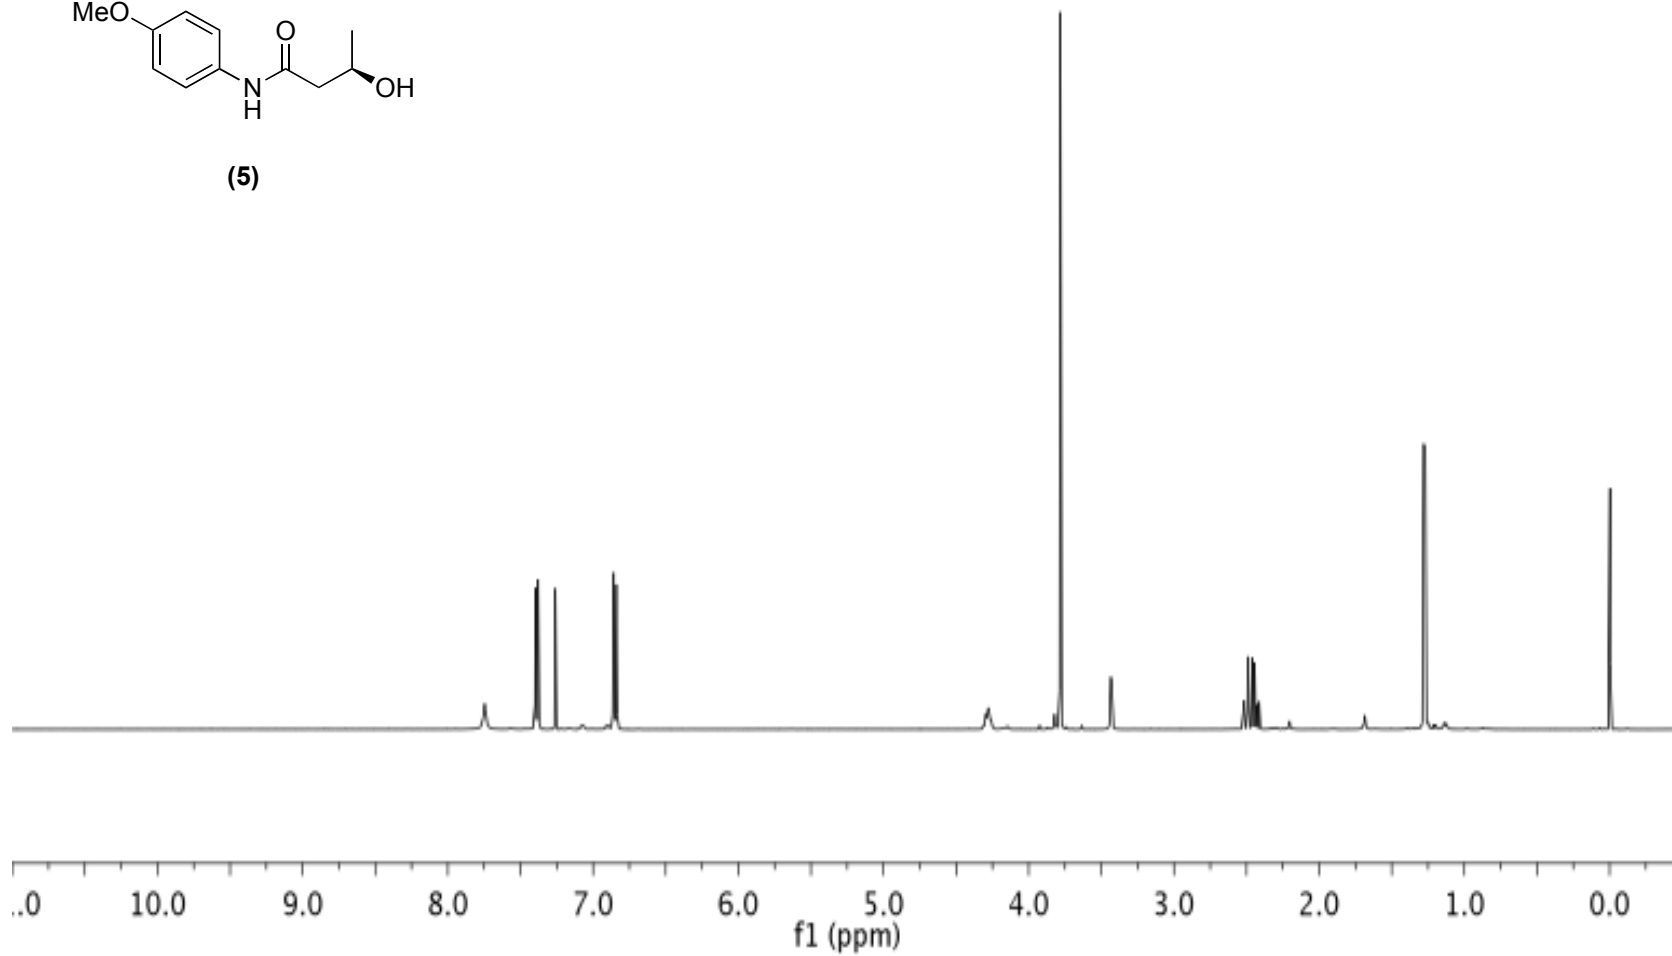

$^1\text{H}$  NMR (500 MHz,  $\text{CDCl}_3$ ) Spectrum of (R)-3-Hydroxy-N-(4-methoxyphenyl)butanamide (5)

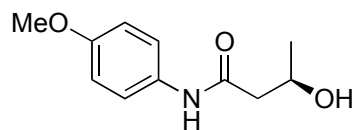

(5)

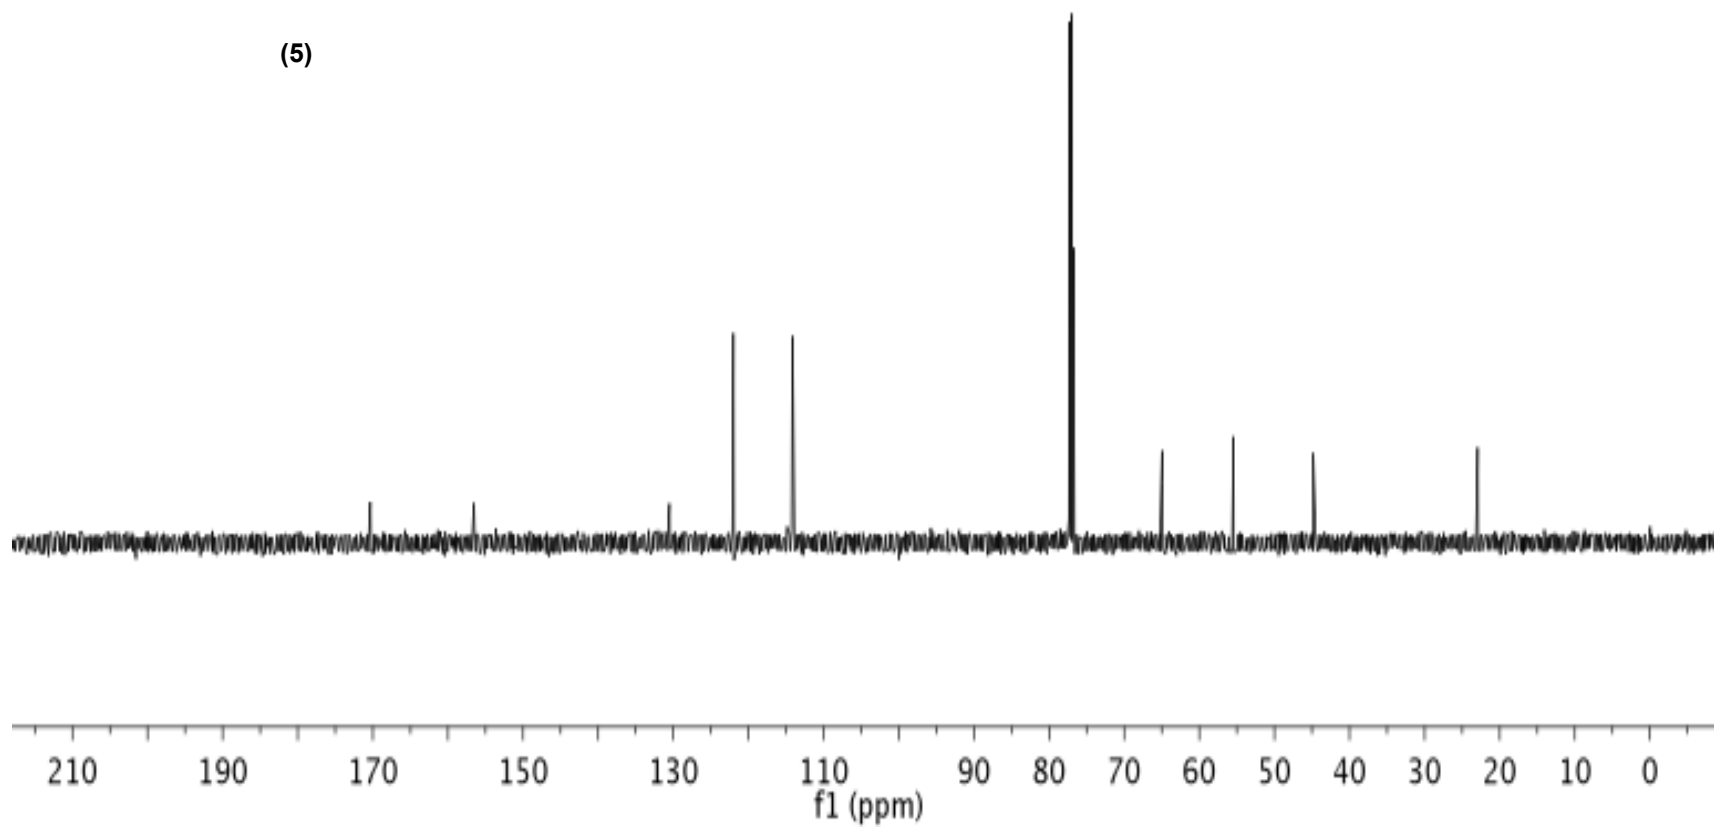

<sup>13</sup>C NMR (128.5 MHz, CDCl<sub>3</sub>) Spectrum of (*R*)-3-Hydroxy-*N*-(4-methoxyphenyl)butanamide (5)
